# Supplementary material
Source: HighWire-hosted journal article supplement (http://molpharm.aspetjournals.org/highwire/filestream/83973/field_highwire_adjunct_files/1/Supp_table_1.xlsx)
Supplement: Supp_table_1.xlsx [file Supp_table_1.xlsx]

## Sheet: Chemokine_receptor_SNPs
Receptor	Position	GPCRdb	Segment	Variant	Mutation Type	Allele Frequency	Allele Count	Allele Number	Homozygotes	SIFT score	PolyPhen score	Functional annotation
ackr1_human	3		N-term	N => S	missense	8.252e-06	1	121176	0	0.06	0.987	PTM (Phosphorylation)
ackr1_human	8		N-term	A => V	missense	2.633e-05	3	113958	0	nan	0.001	PTM (Phosphorylation)
ackr1_human	9		N-term	E => K	missense	8.724e-06	1	114630	0	nan	0.318
ackr1_human	16		N-term	N => S	missense	8.466e-06	1	118122	0	0.17	0.889	PTM (Phosphorylation)
ackr1_human	23		N-term	E => K	missense	2.491e-05	3	120444	0	0.63	0.123
ackr1_human	25		N-term	V => I	missense	8.272e-06	1	120896	0	0.4	0.0	PTM (Phosphorylation)
ackr1_human	37		N-term	P => Q	missense	8.24e-06	1	121356	0	0.55	0.23
ackr1_human	39		N-term	G => E	missense	3.296e-05	4	121364	0	0.27	0.001	PTM (Phosphorylation)
ackr1_human	42		N-term	G => D	missense	0.5235	63498	121294	18927	0.86	0.0	PTM (Phosphorylation)
ackr1_human	45		N-term	L => V	missense	8.239e-06	1	121370	0	0.48	0.136	PTM (Proteolytic Cleavage)
ackr1_human	47		N-term	A => T	missense	8.239e-06	1	121370	0	0.03	0.8	PTM (Phosphorylation)
ackr1_human	48		N-term	A => V	missense	8.239e-06	1	121368	0	0.02	0.988	PTM (Phosphorylation)
ackr1_human	49		N-term	A => V	missense	3.296e-05	4	121368	0	0.0	0.999	PTM (Phosphorylation)
ackr1_human	54		N-term	C => F	missense	8.24e-06	1	121358	0	0.01	0.999	PTM (Phosphorylation)
ackr1_human	59	1.33x33	TM1	D => N	missense	8.242e-06	1	121332	0	0.38	0.023	PTM (Proteolytic Cleavage)
ackr1_human	65	1.39x39	TM1	F => L	missense	8.242e-06	1	121336	0	0.28	0.672	PTM (Phosphorylation)
ackr1_human	67	1.41x41	TM1	L => F	missense	0.01054	1279	121328	57	0.04	0.17	PTM (Phosphorylation)
ackr1_human	72	1.46x46	TM1	G => D	missense	8.242e-06	1	121334	0	0.0	1.0	PTM (Proteolytic Cleavage)
ackr1_human	74	1.48x48	TM1	L => Q	missense	8.242e-06	1	121336	0	0.0	1.0	PTM (Phosphorylation)
ackr1_human	77	1.51x51	TM1	S => G	missense	8.242e-06	1	121334	0	1.0	0.0	PTM (N-linked Glycosylation)
ackr1_human	77	1.51x51	TM1	S => N	missense	8.242e-06	1	121332	0	0.01	0.131	PTM (N-linked Glycosylation)
ackr1_human	79	1.53x53	TM1	V => A	missense	1.648e-05	2	121336	0	0.03	0.138
ackr1_human	85	1.59x59	TM1	R => T	missense	8.243e-06	1	121316	0	0.06	0.987	PTM (Phosphorylation)
ackr1_human	86	1.60x60	TM1	P => S	missense	1.649e-05	2	121318	0	0.06	1.0	PTM (Proteolytic Cleavage)
ackr1_human	88		ICL1	F => L	missense	3.297e-05	4	121318	0	0.09	0.971
ackr1_human	89		ICL1	R => C	missense	0.01072	1301	121308	11	0.16	0.828	PTM (Phosphorylation)
ackr1_human	89		ICL1	R => H	missense	9.892e-05	12	121316	0	1.0	0.003	PTM (Phosphorylation)
ackr1_human	91		ICL1	Q => K	missense	8.243e-06	1	121318	0	0.07	0.255
ackr1_human	94	2.38x38	TM2	P => L	missense	8.243e-06	1	121312	0	0.01	0.91
ackr1_human	94	2.38x38	TM2	P => R	missense	8.243e-06	1	121312	0	0.08	0.398
ackr1_human	96	2.40x40	TM2	W => C	missense	8.244e-06	1	121300	0	0.01	0.879	PTM (Phosphorylation)
ackr1_human	100	2.44x44	TM2	A => T	missense	0.1267	15365	121282	1239	0.14	0.259
ackr1_human	100	2.44x44	TM2	A => V	missense	2.473e-05	3	121296	0	0.61	0.101
ackr1_human	104	2.48x48	TM2	V => M	missense	8.245e-06	1	121288	0	0.03	0.993	PTM (Phosphorylation)
ackr1_human	104	2.48x48	TM2	V => A	missense	8.245e-06	1	121286	0	0.05	0.355	PTM (Phosphorylation)
ackr1_human	105	2.49x49	TM2	G => D	missense	5.772e-05	7	121272	0	0.0	1.0	PTM (Phosphorylation)
ackr1_human	111	2.55x55	TM2	I => F	missense	8.249e-06	1	121226	0	0.06	0.908
ackr1_human	111	2.55x55	TM2	I => M	missense	8.249e-06	1	121222	0	0.06	0.937
ackr1_human	112	2.56x56	TM2	V => M	missense	8.249e-06	1	121220	0	0.15	0.983	PTM (Phosphorylation)
ackr1_human	115	2.59x59	TM2	V => I	missense	8.254e-06	1	121154	0	1.0	0.003
ackr1_human	115	2.59x59	TM2	V => F	missense	8.254e-06	1	121154	0	0.18	0.313
ackr1_human	119	2.63x63	TM2	G => R	missense	8.259e-06	1	121080	0	0.0	1.0	PTM (Phosphorylation)
ackr1_human	122	2.66x66	TM2	S => R	missense	1.653e-05	2	121014	0	0.37	0.361	PTM (Phosphorylation)
ackr1_human	123		ECL1	T => I	missense	8.264e-06	1	121006	0	0.02	0.843
ackr1_human	124		ECL1	R => C	missense	8.269e-06	1	120940	0	0.18	0.663	SodiumPocket MicroSwitch PTM (Phosphorylation)
ackr1_human	124		ECL1	R => L	missense	5.785e-05	7	121000	0	0.67	0.148	SodiumPocket MicroSwitch PTM (Phosphorylation)
ackr1_human	126		ECL1	S => F	missense	8.264e-05	10	121000	0	0.0	0.528	PTM (Phosphorylation)
ackr1_human	127		ECL1	A => S	missense	2.48e-05	3	120956	0	0.46	0.149	PTM (Phosphorylation)
ackr1_human	132	3.28x28	TM3	G => D	missense	9.102e-05	11	120850	0	0.0	0.106	PTM (Ubiquitylation)
ackr1_human	137	3.33x33	TM3	Y => H	missense	8.28e-06	1	120776	0	0.12	0.498	PTM (Phosphorylation)
ackr1_human	140	3.36x36	TM3	A => V	missense	8.288e-06	1	120652	0	0.05	0.999	PTM (Phosphorylation)
ackr1_human	144	3.40x40	TM3	A => P	missense	8.296e-06	1	120546	0	0.01	0.996	PTM (Acetylation)
ackr1_human	151	3.47x47	TM3	A => T	missense	8.309e-06	1	120350	0	0.0	0.94	PTM (Phosphorylation)
ackr1_human	152	3.48x48	TM3	S => F	missense	0.002061	248	120358	1	0.04	0.782	PTM (Phosphorylation)
ackr1_human	152	3.48x48	TM3	S => Y	missense	0.0002493	30	120358	0	0.01	0.844	PTM (Phosphorylation)
ackr1_human	153	3.49x49	TM3	L => M	missense	1.662e-05	2	120356	0	0.03	1.0	PTM (Phosphorylation)
ackr1_human	153	3.49x49	TM3	L => V	missense	8.309e-06	1	120356	0	0.0	0.999	PTM (Phosphorylation)
ackr1_human	158	3.54x54	TM3	G => C	missense	8.309e-06	1	120356	0	0.07	0.983	PTM (Phosphorylation) GP (contact)
ackr1_human	159	3.55x55	TM3	A => T	missense	1.662e-05	2	120368	0	0.49	0.039	PTM (Phosphorylation) GP (contact)
ackr1_human	160	3.56x56	TM3	G => D	missense	8.306e-06	1	120394	0	0.22	0.011	PTM (Phosphorylation) GP (contact)
ackr1_human	161		ICL2	Q => R	missense	3.322e-05	4	120402	0	0.42	0.005	PTM (Phosphorylation)
ackr1_human	161		ICL2	Q => L	missense	8.306e-06	1	120402	0	0.18	0.005	PTM (Phosphorylation)
ackr1_human	170	4.46x46	TM4	T => I	missense	1.66e-05	2	120498	0	0.02	0.35	PTM (Phosphorylation)
ackr1_human	174	4.50x50	TM4	W => L	missense	0.0001078	13	120538	0	0.0	0.999	PTM (Phosphorylation)
ackr1_human	175	4.51x51	TM4	G => R	missense	8.303e-06	1	120444	0	0.06	0.943	PTM (Phosphorylation)
ackr1_human	177	4.53x53	TM4	A => V	missense	8.314e-06	1	120272	0	0.0	0.628	PTM (Phosphorylation)
ackr1_human	178	4.54x54	TM4	A => S	missense	8.31e-06	1	120344	0	0.21	0.546	PTM (Phosphorylation)
ackr1_human	179	4.55x55	TM4	L => I	missense	8.312e-06	1	120312	0	0.01	0.904	PTM (Disulfide bond)
ackr1_human	181	4.57x57	TM4	T => K	missense	8.309e-06	1	120352	0	0.01	0.366
ackr1_human	186	4.62x63	TM4	L => V	missense	8.294e-06	1	120566	0	0.01	0.998
ackr1_human	187	4.63x64	TM4	A => T	missense	8.289e-06	1	120646	0	0.13	0.059	PTM (Phosphorylation)
ackr1_human	188	4.64x65	TM4	S => N	missense	8.286e-06	1	120680	0	0.02	0.818	PTM (Phosphorylation)
ackr1_human	192		ECL2	G => S	missense	8.279e-06	1	120782	0	0.76	0.003
ackr1_human	197	45.52x52	ECL2	L => P	missense	3.306e-05	4	120974	0	0.1	0.001
ackr1_human	198		ECL2	I => M	missense	8.263e-06	1	121026	0	0.14	0.004	PTM (N-linked Glycosylation)
ackr1_human	201	5.33x33	TM5	T => M	missense	1.652e-05	2	121076	0	0.06	0.002	PTM (Ubiquitylation)
ackr1_human	202	5.34x34	TM5	E => K	missense	8.257e-06	1	121110	0	0.31	0.327	PTM (Phosphorylation)
ackr1_human	207	5.39x39	TM5	Q => E	missense	8.251e-06	1	121198	0	0.27	0.441	SodiumPocket MicroSwitch
ackr1_human	209	5.41x41	TM5	T => A	missense	1.649e-05	2	121254	0	0.54	0.107	PTM (Phosphorylation)
ackr1_human	219	5.51x51	TM5	V => I	missense	0.0001236	15	121378	0	0.72	0.023	PTM (Phosphorylation)
ackr1_human	220	5.52x52	TM5	L => W	missense	8.238e-06	1	121382	0	0.0	0.992	PTM (Phosphorylation)
ackr1_human	220	5.52x52	TM5	L => F	missense	1.648e-05	2	121382	0	0.01	0.967	PTM (Phosphorylation)
ackr1_human	221	5.53x53	TM5	L => W	missense	1.648e-05	2	121384	0	0.02	0.992	PTM (Phosphorylation)
ackr1_human	222	5.54x54	TM5	P => L	missense	8.238e-06	1	121388	0	0.0	0.999	PTM (Phosphorylation)
ackr1_human	227	5.59x59	TM5	G => R	missense	8.237e-06	1	121398	0	0.06	0.995	PTM (Phosphorylation)
ackr1_human	227	5.59x59	TM5	G => E	missense	6.59e-05	8	121398	0	0.08	0.994	PTM (Phosphorylation)
ackr1_human	230	5.62x62	TM5	G => R	missense	8.237e-06	1	121402	0	0.02	0.995	PTM (Ubiquitylation)
ackr1_human	234		ICL3	A => S	missense	8.237e-06	1	121408	0	0.17	0.329	PTM (Phosphorylation)
ackr1_human	235		ICL3	L => S	missense	8.237e-05	10	121406	0	0.03	0.933	PTM (Ubiquitylation)
ackr1_human	237		ICL3	M => I	missense	8.237e-06	1	121402	0	0.06	0.245	PTM (Phosphorylation)
ackr1_human	239	6.34x34	TM6	P => S	missense	1.647e-05	2	121402	0	0.33	0.969	PTM (Phosphorylation)
ackr1_human	240	6.35x35	TM6	G => V	missense	1.647e-05	2	121400	0	0.24	0.804	PTM (Phosphorylation)
ackr1_human	243	6.38x38	TM6	M => I	missense	8.238e-06	1	121392	0	0.08	0.004	PTM (Phosphorylation)
ackr1_human	250	6.45x45	TM6	F => L	missense	8.238e-06	1	121392	0	0.0	0.997	PTM (Phosphorylation)
ackr1_human	254	6.49x49	TM6	W => C	missense	1.648e-05	2	121392	0	0.03	0.028	PTM (Acetylation)
ackr1_human	255	6.50x50	TM6	P => S	missense	8.238e-06	1	121392	0	0.03	0.951	PTM (Phosphorylation)
ackr1_human	266	6.61x61	TM6	V => M	missense	2.471e-05	3	121396	0	0.01	1.0	PTM (Phosphorylation)
ackr1_human	275	7.24x23	TM7	T => A	missense	8.237e-06	1	121402	0	0.04	0.311	PTM (Phosphorylation)
ackr1_human	278	7.27x26	TM7	A => T	missense	2.471e-05	3	121402	0	0.47	0.159
ackr1_human	280	7.29x28	TM7	Q => E	missense	8.237e-06	1	121404	0	0.36	0.157	PTM (Sumoylation)
ackr1_human	283	7.32x31	TM7	D => G	missense	2.471e-05	3	121404	0	0.0	0.999	PTM (Phosphorylation)
ackr1_human	288	7.37x36	TM7	L => V	missense	8.237e-06	1	121408	0	0.08	0.952	PTM (Phosphorylation)
ackr1_human	291	7.40x39	TM7	A => D	missense	8.237e-06	1	121410	0	0.0	0.967	PTM (Phosphorylation)
ackr1_human	293	7.42x41	TM7	A => T	missense	8.237e-06	1	121410	0	0.06	0.107	PTM (Retinal protein)
ackr1_human	295	7.44x43	TM7	L => F	missense	8.237e-06	1	121410	0	0.02	0.028	PTM (Phosphorylation)
ackr1_human	296	7.45x45	TM7	H => Y	missense	8.237e-06	1	121410	0	0.0	0.999	PTM (Retinal protein)
ackr1_human	298	7.47x47	TM7	V => L	missense	8.237e-06	1	121398	0	0.09	0.744	PTM (Phosphorylation)
ackr1_human	298	7.47x47	TM7	V => G	missense	8.237e-06	1	121400	0	0.0	0.814	PTM (Phosphorylation)
ackr1_human	299	7.48x48	TM7	A => T	missense	2.471e-05	3	121398	0	0.03	0.999	PTM (Phosphorylation)
ackr1_human	300	7.49x49	TM7	T => M	missense	2.471e-05	3	121390	0	0.08	0.118
ackr1_human	301	7.50x50	TM7	P => S	missense	1.648e-05	2	121390	0	0.0	0.999	PTM (Phosphorylation)
ackr1_human	313	8.52x52	H8	R => C	missense	0.0001072	13	121214	0	0.0	0.939	PTM (Phosphorylation)
ackr1_human	314	8.53x53	H8	T => N	missense	8.255e-06	1	121132	0	0.12	0.023	PTM (Phosphorylation)
ackr1_human	317	8.56x56	H8	P => L	missense	8.264e-06	1	121000	0	0.08	0.027	PTM (Phosphorylation)
ackr1_human	317	8.56x56	H8	P => H	missense	8.264e-06	1	121000	0	0.0	0.946	PTM (Phosphorylation)
ackr1_human	318		C-term	S => C	missense	8.265e-06	1	120994	0	0.0	0.86	PTM (Phosphorylation)
ackr1_human	320		C-term	P => S	missense	8.273e-06	1	120880	0	0.27	0.876	PTM (Phosphorylation)
ackr1_human	326		C-term	S => A	missense	6.652e-05	8	120260	1	0.2	0.846	PTM (Phosphorylation)
ackr1_human	326		C-term	S => F	missense	0.001929	232	120244	1	0.04	0.134	PTM (Phosphorylation)
ackr1_human	330		C-term	D => G	missense	1.676e-05	2	119302	0	0.05	0.022	PTM (Phosphorylation)
ackr1_human	330		C-term	D => E	missense	8.386e-06	1	119240	0	0.09	0.038	PTM (Phosphorylation)
ackr1_human	331		C-term	T => N	missense	8.406e-06	1	118960	0	0.22	0.006	PTM (Phosphorylation)
ackr1_human	331		C-term	T => I	missense	8.406e-06	1	118960	0	0.12	0.018	PTM (Phosphorylation)
ackr1_human	3		N-term	N => MetfsTer12	frameshift	8.252e-06	1	121188	0	None	None	PTM (Phosphorylation)
ackr1_human	62	1.36x36	TM1	L => CysfsTer16	frameshift	8.242e-06	1	121336	0	None	None	PTM (Phosphorylation)
ackr1_human	95	2.39x39	TM2	G => Ter	stop gained	8.243e-06	1	121308	0	None	None
ackr1_human	143	3.39x39	TM3	Q => LeufsTer181	frameshift	8.29e-06	1	120622	0	None	None	PTM (Phosphorylation)
ackr1_human	151	3.47x47	TM3	A => Ter	stop gained	8.31e-06	1	120338	0	None	None	PTM (Phosphorylation)
ackr1_human	221	5.53x53	TM5	L => SerfsTer13	frameshift	1.648e-05	2	121378	0	None	None	PTM (Phosphorylation)
ackr1_human	227	5.59x59	TM5	G => PhefsTer7	frameshift	8.238e-06	1	121394	0	None	None	PTM (Phosphorylation)
ackr1_human	235		ICL3	L => Ter	stop gained	8.237e-06	1	121406	0	None	None	PTM (Ubiquitylation)
ackr1_human	255	6.50x50	TM6	P => Ter	stop gained	8.238e-06	1	121384	0	None	None	PTM (Phosphorylation)
ackr1_human	287	7.36x35	TM7	N => ArgfsTer2	frameshift	3.295e-05	4	121406	0	None	None	PTM (Phosphorylation)
ackr1_human	308	8.47x47	H8	C => TyrfsTer?	frameshift	8.24e-06	1	121362	0	None	None	PTM (Palmitoylation) GP (contact)
ackr1_human	314	8.53x53	H8	T => ProfsTer?	frameshift	8.246e-06	1	121278	0	None	None	PTM (Phosphorylation)
ackr1_human	317	8.56x56	H8	P => HisfsTer10	frameshift	1.65e-05	2	121192	0	None	None	PTM (Phosphorylation)
ackr1_human	327		C-term	S => Ter	stop gained	8.308e-06	1	120360	0	None	None	PTM (Phosphorylation)
ackr2_human	3		N-term	A => T	missense	8.845e-06	1	113058	0	1.0	0.001	PTM (Phosphorylation)
ackr2_human	6		N-term	S => P	missense	8.741e-06	1	114408	0	0.11	0.091	PTM (Phosphorylation)
ackr2_human	7		N-term	P => L	missense	8.707e-06	1	114852	0	0.02	0.372	PTM (Phosphorylation)
ackr2_human	18		N-term	E => G	missense	8.316e-06	1	120254	0	0.1	0.007	PTM (Phosphorylation)
ackr2_human	19		N-term	N => K	missense	8.299e-06	1	120502	0	0.01	0.654	PTM (Phosphorylation)
ackr2_human	26		N-term	D => E	missense	1.65e-05	2	121244	0	0.95	0.002	PTM (Sulfation)
ackr2_human	32		N-term	A => G	missense	3.296e-05	4	121366	0	0.36	0.07	PTM (Phosphorylation)
ackr2_human	33		N-term	F => L	missense	8.239e-06	1	121370	0	0.03	0.071	PTM (Phosphorylation)
ackr2_human	33		N-term	F => I	missense	8.239e-06	1	121370	0	0.09	0.01	PTM (Phosphorylation)
ackr2_human	37		N-term	R => S	missense	2.471e-05	3	121390	0	0.13	0.017
ackr2_human	41	1.27x27	TM1	V => A	missense	0.05066	6150	121398	188	0.0	0.963	PTM (Phosphorylation)
ackr2_human	51	1.37x37	TM1	V => I	missense	8.237e-06	1	121400	0	0.4	0.004	PTM (Phosphorylation)
ackr2_human	53	1.39x39	TM1	Y => F	missense	8.237e-06	1	121400	0	0.0	0.998	PTM (Phosphorylation)
ackr2_human	54	1.40x40	TM1	S => R	missense	8.237e-06	1	121400	0	0.01	0.634	PTM (Phosphorylation)
ackr2_human	61	1.47x47	TM1	L => F	missense	1.647e-05	2	121404	0	0.02	0.209	PTM (Acetylation)
ackr2_human	63	1.49x49	TM1	G => R	missense	2.471e-05	3	121402	0	0.02	0.994	PTM (Phosphorylation)
ackr2_human	69	1.55x55	TM1	M => I	missense	2.471e-05	3	121408	0	0.74	0.0	PTM (Proteolytic Cleavage)
ackr2_human	71	1.57x57	TM1	L => S	missense	8.237e-06	1	121406	0	0.0	0.998	PTM (Methylation)
ackr2_human	72	1.58x58	TM1	L => F	missense	1.647e-05	2	121404	0	0.01	0.966	PTM (Proteolytic Cleavage)
ackr2_human	72	1.58x58	TM1	L => P	missense	8.237e-06	1	121408	0	0.0	0.983	PTM (Proteolytic Cleavage)
ackr2_human	73	1.59x59	TM1	R => L	missense	8.237e-06	1	121410	0	0.5	0.011	PTM (Phosphorylation)
ackr2_human	76	12.49x49	ICL1	P => T	missense	8.237e-06	1	121404	0	0.02	0.885	PTM (Proteolytic Cleavage)
ackr2_human	76	12.49x49	ICL1	P => L	missense	2.471e-05	3	121410	0	0.05	0.913	PTM (Proteolytic Cleavage)
ackr2_human	77	12.50x50	ICL1	R => H	missense	8.236e-06	1	121412	0	0.06	0.064	PTM (N-linked Glycosylation)
ackr2_human	78	12.51x51	ICL1	R => G	missense	8.236e-06	1	121412	0	0.03	0.872	PTM (N-linked Glycosylation)
ackr2_human	79	2.37x37	TM2	R => W	missense	8.236e-06	1	121412	0	0.0	0.94
ackr2_human	84	2.42x42	TM2	Y => C	missense	2.471e-05	3	121412	0	0.0	0.999	PTM (Phosphorylation)
ackr2_human	87	2.45x45	TM2	N => K	missense	7.413e-05	9	121412	0	0.01	1.0
ackr2_human	90	2.48x48	TM2	I => T	missense	8.236e-06	1	121412	0	0.0	0.608	PTM (Disulfide bond)
ackr2_human	92	2.50x50	TM2	N => S	missense	8.236e-06	1	121412	0	0.01	0.951	PTM (Proteolytic Cleavage)
ackr2_human	93	2.51x51	TM2	L => I	missense	0.0001894	23	121412	0	0.03	0.984
ackr2_human	101	2.59x59	TM2	F => L	missense	8.237e-06	1	121410	0	0.0	1.0	PTM (Phosphorylation)
ackr2_human	113	3.21x21	TM3	G => R	missense	1.647e-05	2	121402	0	0.02	0.999	PTM (Phosphorylation)
ackr2_human	115	3.23x23	TM3	F => S	missense	2.471e-05	3	121404	0	0.03	0.345
ackr2_human	122	3.30x30	TM3	T => A	missense	8.237e-06	1	121406	0	0.73	0.039	PTM (Phosphorylation)
ackr2_human	124	3.32x32	TM3	Y => S	missense	7.413e-05	9	121404	0	0.0	0.991	SodiumPocket MicroSwitch PTM (Phosphorylation)
ackr2_human	125	3.33x33	TM3	T => S	missense	8.237e-06	1	121402	0	0.12	0.3	PTM (Phosphorylation)
ackr2_human	129	3.37x37	TM3	Y => C	missense	8.237e-06	1	121400	0	0.0	0.993	PTM (Phosphorylation)
ackr2_human	131	3.39x39	TM3	G => D	missense	5.766e-05	7	121396	0	0.0	0.998	PTM (Phosphorylation)
ackr2_human	131	3.39x39	TM3	G => V	missense	1.648e-05	2	121396	0	0.0	0.999	PTM (Phosphorylation)
ackr2_human	132	3.40x40	TM3	I => F	missense	8.238e-06	1	121396	0	0.0	0.863	PTM (Ubiquitylation)
ackr2_human	136	3.44x44	TM3	S => G	missense	8.239e-06	1	121374	0	0.13	0.004	PTM (Phosphorylation)
ackr2_human	136	3.44x44	TM3	S => R	missense	1.648e-05	2	121374	0	0.0	0.85	PTM (Phosphorylation)
ackr2_human	138	3.46x46	TM3	M => V	missense	8.24e-06	1	121366	0	0.02	0.151	PTM (Phosphorylation)
ackr2_human	147	3.55x55	TM3	V => I	missense	1.649e-05	2	121320	0	0.02	0.906	PTM (Phosphorylation) GP (contact)
ackr2_human	148	3.56x56	TM3	H => P	missense	8.243e-06	1	121308	0	0.0	0.966	PTM (Phosphorylation) GP (contact)
ackr2_human	151	34.52x52	ICL2	P => S	missense	8.246e-06	1	121278	0	1.0	0.095	PTM (Phosphorylation) GP (contact)
ackr2_human	152	34.53x53	ICL2	Y => C	missense	4.123e-05	5	121280	0	0.18	0.004	PTM (Phosphorylation) GP (contact)
ackr2_human	158	4.39x39	TM4	R => W	missense	2.475e-05	3	121236	0	0.22	0.067	PTM (Phosphorylation)
ackr2_human	158	4.39x39	TM4	R => Q	missense	8.249e-05	10	121230	0	0.41	0.028	PTM (Phosphorylation)
ackr2_human	166	4.47x47	TM4	T => A	missense	8.248e-06	1	121248	0	1.0	0.001
ackr2_human	170	4.51x51	TM4	A => V	missense	8.248e-06	1	121246	0	0.02	0.015	PTM (Phosphorylation)
ackr2_human	172	4.53x53	TM4	S => C	missense	0.0007504	91	121264	0	0.0	0.914
ackr2_human	172	4.53x53	TM4	S => F	missense	1.649e-05	2	121264	0	0.0	0.887
ackr2_human	174	4.55x55	TM4	A => T	missense	8.247e-06	1	121256	0	0.07	0.529	PTM (Phosphorylation)
ackr2_human	175	4.56x56	TM4	V => F	missense	8.247e-06	1	121260	0	0.01	0.677	PTM (Phosphorylation)
ackr2_human	176	4.57x57	TM4	S => A	missense	8.246e-06	1	121268	0	0.02	0.999
ackr2_human	176	4.57x57	TM4	S => F	missense	8.246e-06	1	121272	0	0.0	1.0
ackr2_human	176	4.57x57	TM4	S => C	missense	2.474e-05	3	121272	0	0.0	1.0
ackr2_human	177	4.58x59	TM4	I => V	missense	8.246e-06	1	121278	0	0.43	0.058	PTM (Phosphorylation)
ackr2_human	178	4.59x60	TM4	P => A	missense	8.246e-06	1	121276	0	0.0	1.0	PTM (Phosphorylation)
ackr2_human	185		ECL2	T => A	missense	8.246e-06	1	121276	0	0.19	0.015
ackr2_human	186		ECL2	H => N	missense	8.246e-06	1	121276	0	0.08	0.026
ackr2_human	190		ECL2	K => R	missense	1.649e-05	2	121282	0	0.23	0.004
ackr2_human	191		ECL2	G => R	missense	8.246e-06	1	121274	0	0.05	0.879	PTM (N-linked Glycosylation)
ackr2_human	197	45.52x52	ECL2	A => S	missense	8.246e-06	1	121264	0	0.49	0.581
ackr2_human	200		ECL2	G => S	missense	1.649e-05	2	121270	0	0.06	0.382	PTM (Phosphorylation)
ackr2_human	201		ECL2	G => R	missense	9.071e-05	11	121268	0	0.1	0.792	PTM (Ubiquitylation)
ackr2_human	201		ECL2	G => W	missense	1.649e-05	2	121268	0	0.02	0.965	PTM (Ubiquitylation)
ackr2_human	201		ECL2	G => E	missense	1.649e-05	2	121278	0	0.38	0.094	PTM (Ubiquitylation)
ackr2_human	202		ECL2	H => Y	missense	4.124e-05	5	121244	0	0.01	0.915	PTM (Phosphorylation)
ackr2_human	205	5.33x34	TM5	I => V	missense	1.649e-05	2	121286	0	1.0	0.003	PTM (Phosphorylation)
ackr2_human	209	5.37x38	TM5	F => Y	missense	8.245e-06	1	121284	0	0.37	0.006	PTM (Phosphorylation)
ackr2_human	210	5.38x39	TM5	L => P	missense	8.246e-06	1	121278	0	0.0	0.998
ackr2_human	210	5.38x39	TM5	L => H	missense	8.246e-06	1	121278	0	0.0	0.998
ackr2_human	211	5.39x40	TM5	R => C	missense	1.649e-05	2	121266	0	0.02	0.998	PTM (Phosphorylation)
ackr2_human	212	5.40x41	TM5	F => S	missense	0.0002638	32	121304	0	0.04	0.08	PTM (Phosphorylation)
ackr2_human	216	5.44x45	TM5	L => P	missense	8.243e-06	1	121316	0	0.01	0.912	PTM (Phosphorylation)
ackr2_human	218	5.46x461	TM5	G => A	missense	0.002983	362	121338	5	0.05	0.999	PTM (Phosphorylation)
ackr2_human	218	5.46x461	TM5	G => E	missense	8.241e-06	1	121338	0	0.0	0.999	PTM (Phosphorylation)
ackr2_human	223	5.51x51	TM5	L => V	missense	4.12e-05	5	121354	0	0.02	0.825	PTM (Phosphorylation)
ackr2_human	223	5.51x51	TM5	L => F	missense	8.24e-06	1	121354	0	0.83	0.09	PTM (Phosphorylation)
ackr2_human	226	5.54x54	TM5	M => V	missense	1.648e-05	2	121368	0	0.0	0.998	PTM (Phosphorylation)
ackr2_human	230	5.58x58	TM5	Y => H	missense	8.238e-06	1	121382	0	0.04	1.0	PTM (Ubiquitylation)
ackr2_human	231	5.59x59	TM5	S => F	missense	9.886e-05	12	121388	0	0.0	0.941	PTM (Acetylation)
ackr2_human	232	5.60x60	TM5	R => G	missense	8.238e-06	1	121384	0	0.0	0.997	PTM (Phosphorylation)
ackr2_human	232	5.60x60	TM5	R => H	missense	2.471e-05	3	121390	0	0.02	0.999	PTM (Phosphorylation)
ackr2_human	233	5.61x61	TM5	I => T	missense	0.0001236	15	121388	0	0.0	0.97	PTM (Phosphorylation) GP (contact)
ackr2_human	237	5.65x65	TM5	L => W	missense	8.238e-06	1	121386	0	0.0	1.0	PTM (Phosphorylation) GP (contact)
ackr2_human	243		ICL3	A => V	missense	8.238e-06	1	121390	0	0.03	0.003	PTM (Phosphorylation)
ackr2_human	247	6.32x32	TM6	R => W	missense	8.238e-06	1	121392	0	0.0	0.991	PTM (Phosphorylation) GP (contact)
ackr2_human	248	6.33x33	TM6	A => T	missense	1.647e-05	2	121398	0	0.02	0.936	PTM (Phosphorylation) GP (contact)
ackr2_human	251	6.36x36	TM6	I => T	missense	4.942e-05	6	121402	0	0.01	0.011	PTM (Phosphorylation) GP (contact)
ackr2_human	254	6.39x39	TM6	A => T	missense	8.237e-06	1	121402	0	0.7	0.071	PTM (Acetylation)
ackr2_human	254	6.39x39	TM6	A => D	missense	8.237e-06	1	121404	0	0.02	0.649	PTM (Acetylation)
ackr2_human	255	6.40x40	TM6	L => M	missense	8.237e-06	1	121402	0	0.0	1.0	PTM (Phosphorylation) GP (contact)
ackr2_human	257	6.42x42	TM6	V => M	missense	1.647e-05	2	121404	0	0.13	0.301	PTM (Phosphorylation)
ackr2_human	258	6.43x43	TM6	A => V	missense	8.237e-06	1	121406	0	1.0	0.025	PTM (Phosphorylation)
ackr2_human	260	6.45x45	TM6	F => L	missense	1.647e-05	2	121408	0	0.0	1.0	PTM (Phosphorylation)
ackr2_human	262	6.47x47	TM6	L => V	missense	8.237e-06	1	121410	0	0.0	0.917	PTM (Phosphorylation)
ackr2_human	263	6.48x48	TM6	W => C	missense	8.237e-06	1	121410	0	0.0	1.0	PTM (Phosphorylation)
ackr2_human	264	6.49x49	TM6	F => Y	missense	8.237e-06	1	121410	0	0.05	0.937	PTM (Phosphorylation)
ackr2_human	267	6.52x52	TM6	N => H	missense	8.237e-06	1	121410	0	0.0	1.0	PTM (Phosphorylation)
ackr2_human	267	6.52x52	TM6	N => S	missense	4.942e-05	6	121412	0	0.01	1.0	PTM (Phosphorylation)
ackr2_human	273	6.58x58	TM6	H => Y	missense	1.647e-05	2	121412	0	0.05	0.094	PTM (Phosphorylation)
ackr2_human	273	6.58x58	TM6	H => P	missense	0.0001977	24	121412	0	0.0	0.966	PTM (Phosphorylation)
ackr2_human	273	6.58x58	TM6	H => L	missense	1.647e-05	2	121412	0	0.03	0.212	PTM (Phosphorylation)
ackr2_human	274	6.59x59	TM6	T => R	missense	8.236e-06	1	121412	0	0.0	0.257
ackr2_human	274	6.59x59	TM6	T => M	missense	8.236e-06	1	121412	0	0.0	0.463
ackr2_human	276	6.61x61	TM6	L => F	missense	8.236e-06	1	121412	0	0.17	0.829
ackr2_human	280		ECL3	V => L	missense	8.236e-06	1	121412	0	0.21	0.225	PTM (Sumoylation)
ackr2_human	282		ECL3	G => W	missense	8.237e-06	1	121410	0	0.1	0.211	PTM (Ubiquitylation)
ackr2_human	283	7.24x23	TM7	N => H	missense	8.237e-06	1	121410	0	0.02	0.549	PTM (Phosphorylation)
ackr2_human	284	7.25x24	TM7	C => Y	missense	8.237e-06	1	121410	0	0.0	1.0
ackr2_human	285	7.26x25	TM7	E => D	missense	8.237e-06	1	121410	0	0.01	0.403	PTM (Phosphorylation)
ackr2_human	289	7.30x29	TM7	H => Q	missense	8.237e-06	1	121410	0	0.63	0.018	PTM (Phosphorylation)
ackr2_human	291	7.32x31	TM7	D => E	missense	8.237e-06	1	121408	0	0.0	1.0	PTM (Phosphorylation)
ackr2_human	293	7.34x33	TM7	A => T	missense	0.0001894	23	121408	0	0.09	0.316	PTM (Retinal protein)
ackr2_human	293	7.34x33	TM7	A => S	missense	8.237e-06	1	121408	0	0.01	0.897	PTM (Retinal protein)
ackr2_human	294	7.35x34	TM7	L => P	missense	2.471e-05	3	121406	0	0.0	0.963	PTM (Phosphorylation)
ackr2_human	297	7.38x37	TM7	T => S	missense	2.471e-05	3	121406	0	0.01	0.979	PTM (Phosphorylation)
ackr2_human	309	7.50x50	TM7	P => A	missense	1.648e-05	2	121384	0	0.0	1.0	PTM (Phosphorylation)
ackr2_human	311	7.52x52	TM7	L => V	missense	0.001491	181	121390	0	0.0	0.811	PTM (Phosphorylation)
ackr2_human	315	7.56x56	TM7	S => C	missense	2.472e-05	3	121380	0	0.07	0.015	PTM (Phosphorylation) GP (contact)
ackr2_human	315	7.56x56	TM7	S => F	missense	8.239e-06	1	121380	0	0.07	0.037	PTM (Phosphorylation) GP (contact)
ackr2_human	316	8.47x47	H8	S => I	missense	0.0001483	18	121376	0	0.04	0.035	PTM (Phosphorylation) GP (contact)
ackr2_human	317	8.48x48	H8	H => Y	missense	0.0001483	18	121378	0	0.01	0.167	PTM (Phosphorylation) GP (contact)
ackr2_human	318	8.49x49	H8	R => C	missense	4.943e-05	6	121374	0	0.03	0.064	PTM (Phosphorylation) GP (contact)
ackr2_human	319	8.50x50	H8	F => V	missense	8.239e-06	1	121380	0	0.0	0.928	PTM (Phosphorylation)
ackr2_human	320	8.51x51	H8	R => C	missense	3.295e-05	4	121380	0	0.01	0.139	PTM (Phosphorylation) GP (contact)
ackr2_human	320	8.51x51	H8	R => H	missense	0.001755	213	121378	3	0.0	0.961	PTM (Phosphorylation) GP (contact)
ackr2_human	330		C-term	V => M	missense	8.239e-06	1	121374	0	0.07	0.049	PTM (Phosphorylation)
ackr2_human	331		C-term	L => R	missense	8.239e-06	1	121378	0	0.0	0.935	PTM (Phosphorylation)
ackr2_human	337		C-term	P => L	missense	8.24e-06	1	121356	0	0.02	0.314	PTM (Phosphorylation)
ackr2_human	341		C-term	Q => R	missense	8.239e-06	1	121378	0	0.1	0.004	PTM (Phosphorylation)
ackr2_human	345		C-term	S => F	missense	8.238e-06	1	121382	0	0.01	0.526	PTM (Phosphorylation)
ackr2_human	352		C-term	I => L	missense	8.238e-06	1	121382	0	0.65	0.003	PTM (Phosphorylation)
ackr2_human	353		C-term	L => P	missense	8.239e-06	1	121376	0	0.08	0.649	PTM (Phosphorylation)
ackr2_human	361		C-term	G => V	missense	9.069e-05	11	121286	0	0.04	0.051	PTM (Palmitoylation)
ackr2_human	362		C-term	M => R	missense	8.248e-06	1	121244	0	0.0	0.548	PTM (Phosphorylation)
ackr2_human	366		C-term	G => R	missense	8.257e-06	1	121112	0	nan	0.015	PTM (Phosphorylation)
ackr2_human	367		C-term	E => K	missense	1.652e-05	2	121050	0	nan	0.006	PTM (Phosphorylation)
ackr2_human	369		C-term	Q => P	missense	8.274e-06	1	120856	0	nan	0.007	PTM (Acetylation)
ackr2_human	373		C-term	Y => S	missense	0.4218	50741	120302	11715	nan	0.0	PTM (Phosphorylation)
ackr2_human	373		C-term	Y => F	missense	0.008786	1057	120302	10	nan	0.0	PTM (Phosphorylation)
ackr2_human	376		C-term	K => E	missense	8.483e-06	1	117876	0	nan	0.001	PTM (Phosphorylation)
ackr2_human	376		C-term	K => M	missense	8.492e-06	1	117762	0	nan	0.013	PTM (Phosphorylation)
ackr2_human	378		C-term	D => E	missense	1.709e-05	2	117038	0	nan	0.0	PTM (Phosphorylation)
ackr2_human	381		C-term	N => K	missense	8.648e-06	1	115628	0	nan	0.0
ackr2_human	30		N-term	E => Ter	stop gained	8.242e-06	1	121334	0	None	None	PTM (N-linked Glycosylation)
ackr2_human	79	2.37x37	TM2	R => LeufsTer3	frameshift	8.236e-06	1	121412	0	None	None
ackr2_human	105	2.63x63	TM2	S => GlyfsTer21	frameshift	8.237e-06	1	121406	0	None	None	PTM (Phosphorylation)
ackr2_human	114	3.22x22	TM3	S => ValfsTer7	frameshift	8.237e-06	1	121404	0	None	None	PTM (Phosphorylation)
ackr2_human	136	3.44x44	TM3	S => ArgfsTer41	frameshift	8.239e-06	1	121374	0	None	None	PTM (Phosphorylation)
ackr2_human	193		ECL2	W => CysfsTer94	frameshift	8.246e-06	1	121274	0	None	None	PTM (Phosphorylation)
ackr2_human	206	5.34x35	TM5	W => Ter	stop gained	8.246e-06	1	121272	0	None	None	PTM (Phosphorylation)
ackr2_human	226	5.54x54	TM5	M => ThrfsTer12	frameshift	8.239e-06	1	121368	0	None	None	PTM (Phosphorylation)
ackr2_human	266	6.51x51	TM6	Y => Ter	stop gained	1.647e-05	2	121410	0	None	None	PTM (Phosphorylation)
ackr2_human	284	7.25x24	TM7	C => ValfsTer7	frameshift	8.237e-06	1	121410	0	None	None
ackr2_human	299	7.40x39	TM7	S => HisfsTer50	frameshift	0.0003295	40	121406	0	None	None	PTM (Phosphorylation)
ackr2_human	312	7.53x53	TM7	Y => LeufsTer38	frameshift	8.238e-06	1	121382	0	None	None	PTM (Retinal protein)
ackr2_human	313	7.54x54	TM7	A => GlyfsTer37	frameshift	8.238e-06	1	121386	0	None	None	PTM (Phosphorylation)
ackr2_human	337		C-term	P => LeufsTer21	frameshift	0.0009722	118	121376	0	None	None	PTM (Phosphorylation)
ackr2_human	341		C-term	Q => Ter	stop gained	8.239e-06	1	121378	0	None	None	PTM (Phosphorylation)
ackr2_human	369		C-term	Q => Ter	stop gained	8.274e-06	1	120854	0	None	None	PTM (Acetylation)
ackr3_human	4		N-term	H => Y	missense	2.502e-05	3	119910	0	nan	0.023	PTM (Phosphorylation)
ackr3_human	4		N-term	H => P	missense	1.666e-05	2	120068	0	nan	0.0	PTM (Phosphorylation)
ackr3_human	4		N-term	H => Q	missense	8.324e-06	1	120130	0	nan	0.023	PTM (Phosphorylation)
ackr3_human	7		N-term	D => N	missense	1.657e-05	2	120670	0	nan	0.856	PTM (Phosphorylation)
ackr3_human	10		N-term	E => K	missense	8.26e-06	1	121060	0	0.02	0.606	PTM (Phosphorylation)
ackr3_human	10		N-term	E => A	missense	8.258e-06	1	121088	0	0.02	0.601	PTM (Phosphorylation)
ackr3_human	11		N-term	P => A	missense	8.258e-06	1	121092	0	0.69	0.013	PTM (N-linked Glycosylation)
ackr3_human	12		N-term	G => R	missense	5.778e-05	7	121154	1	0.44	0.177	PTM (Phosphorylation)
ackr3_human	15		N-term	S => L	missense	0.0003053	37	121204	1	0.01	0.124	PTM (Phosphorylation)
ackr3_human	16		N-term	D => G	missense	8.249e-06	1	121234	0	0.02	0.342	PTM (Phosphorylation)
ackr3_human	17		N-term	I => V	missense	8.247e-06	1	121250	0	0.51	0.001	PTM (Phosphorylation)
ackr3_human	22		N-term	N => S	missense	8.252e-06	1	121176	0	0.28	0.014	PTM (Sulfation)
ackr3_human	25		N-term	D => G	missense	3.304e-05	4	121056	0	0.04	0.16	PTM (Phosphorylation)
ackr3_human	28		N-term	V => M	missense	1.654e-05	2	120890	0	0.22	0.002	PTM (Sulfation)
ackr3_human	31		N-term	T => M	missense	4.146e-05	5	120584	0	0.02	0.011	PTM (Phosphorylation)
ackr3_human	39		N-term	N => K	missense	8.351e-06	1	119748	0	0.02	0.112	PTM (Phosphorylation)
ackr3_human	41		N-term	S => T	missense	5.018e-05	6	119564	0	0.44	0.002	PTM (Phosphorylation)
ackr3_human	41		N-term	S => R	missense	8.373e-06	1	119430	0	0.4	0.011	PTM (Phosphorylation)
ackr3_human	42	1.30x30	TM1	V => I	missense	0.002846	340	119466	1	0.1	0.001	PTM (Phosphorylation)
ackr3_human	46	1.34x34	TM1	T => M	missense	2.525e-05	3	118832	0	0.02	0.437	PTM (O-GalNAc)
ackr3_human	56	1.44x44	TM1	V => I	missense	1.684e-05	2	118764	0	0.36	0.028	PTM (Phosphorylation)
ackr3_human	56	1.44x44	TM1	V => F	missense	8.42e-06	1	118764	0	0.11	0.169	PTM (Phosphorylation)
ackr3_human	58	1.46x46	TM1	G => S	missense	4.206e-05	5	118880	0	0.0	1.0	PTM (Phosphorylation)
ackr3_human	64	1.52x52	TM1	V => L	missense	0.0008081	97	120032	1	0.93	0.048	PTM (Proteolytic Cleavage)
ackr3_human	64	1.52x52	TM1	V => M	missense	4.166e-05	5	120032	0	0.1	0.462	PTM (Proteolytic Cleavage)
ackr3_human	68	1.56x56	TM1	V => M	missense	8.296e-06	1	120540	0	0.06	0.164	PTM (Phosphorylation)
ackr3_human	71	1.59x59	TM1	Q => H	missense	8.275e-06	1	120852	0	0.18	0.949	PTM (Methylation)
ackr3_human	77	2.37x37	TM2	Y => C	missense	4.125e-05	5	121200	0	0.17	0.201	PTM (N-linked Glycosylation)
ackr3_human	78	2.38x38	TM2	D => G	missense	8.25e-06	1	121212	0	0.07	0.015	PTM (N-linked Glycosylation)
ackr3_human	79	2.39x39	TM2	T => M	missense	3.299e-05	4	121232	0	0.06	0.102
ackr3_human	84	2.44x44	TM2	L => W	missense	8.242e-06	1	121328	0	0.0	0.954	PTM (Phosphorylation)
ackr3_human	91	2.51x51	TM2	L => M	missense	8.238e-06	1	121388	0	0.0	1.0
ackr3_human	97	2.57x57	TM2	I => V	missense	8.237e-06	1	121402	0	0.07	0.02
ackr3_human	97	2.57x57	TM2	I => T	missense	8.237e-06	1	121402	0	0.0	0.41
ackr3_human	105	2.65x65	TM2	V => M	missense	0.0001071	13	121406	0	0.31	0.884	PTM (Phosphorylation)
ackr3_human	113	3.21x21	TM3	G => S	missense	1.647e-05	2	121400	0	0.0	1.0	PTM (Phosphorylation)
ackr3_human	114	3.22x22	TM3	E => K	missense	1.647e-05	2	121398	0	0.19	0.802	PTM (Phosphorylation)
ackr3_human	116	3.24x24	TM3	T => M	missense	1.647e-05	2	121402	0	0.25	0.153
ackr3_human	124	3.32x32	TM3	F => L	missense	8.238e-06	1	121390	0	0.01	0.968	SodiumPocket MicroSwitch PTM (Phosphorylation)
ackr3_human	135	3.43x43	TM3	L => F	missense	1.648e-05	2	121384	0	0.04	0.424	PTM (Phosphorylation)
ackr3_human	136	3.44x44	TM3	T => M	missense	8.238e-06	1	121386	0	0.0	0.899	PTM (Phosphorylation)
ackr3_human	137	3.45x45	TM3	C => G	missense	3.295e-05	4	121384	0	0.03	0.99	PTM (Phosphorylation)
ackr3_human	138	3.46x46	TM3	M => V	missense	8.238e-06	1	121386	0	0.01	0.897	PTM (Phosphorylation)
ackr3_human	138	3.46x46	TM3	M => I	missense	8.238e-06	1	121386	0	0.05	0.93	PTM (Phosphorylation)
ackr3_human	141	3.49x49	TM3	D => E	missense	8.238e-06	1	121386	0	0.0	1.0	PTM (Phosphorylation)
ackr3_human	149		ICL2	F => S	missense	8.239e-06	1	121380	0	0.45	0.219	PTM (Phosphorylation)
ackr3_human	153		ICL2	P => S	missense	3.295e-05	4	121380	0	0.88	0.001	PTM (Phosphorylation)
ackr3_human	153		ICL2	P => R	missense	8.239e-06	1	121378	0	0.64	0.106	PTM (Phosphorylation)
ackr3_human	160	4.41x41	TM4	V => A	missense	8.238e-06	1	121386	0	0.65	0.002	PTM (Phosphorylation)
ackr3_human	161	4.42x42	TM4	R => C	missense	4.943e-05	6	121386	0	0.04	0.44	PTM (Phosphorylation)
ackr3_human	162	4.43x43	TM4	R => C	missense	2.471e-05	3	121384	0	0.05	0.159	PTM (Phosphorylation)
ackr3_human	162	4.43x43	TM4	R => H	missense	1.648e-05	2	121384	0	0.07	0.159	PTM (Phosphorylation)
ackr3_human	164	4.45x45	TM4	V => I	missense	1.648e-05	2	121390	0	1.0	0.02
ackr3_human	166	4.47x47	TM4	I => M	missense	8.238e-06	1	121388	0	0.11	0.478
ackr3_human	168	4.49x49	TM4	V => A	missense	0.0004366	53	121382	1	0.14	0.019	PTM (Phosphorylation)
ackr3_human	175	4.56x56	TM4	V => M	missense	0.0003131	38	121378	0	0.06	0.72	PTM (Phosphorylation)
ackr3_human	175	4.56x56	TM4	V => L	missense	8.239e-06	1	121378	0	0.33	0.037	PTM (Phosphorylation)
ackr3_human	184		ECL2	K => E	missense	8.24e-06	1	121362	0	0.15	0.145	PTM (Phosphorylation)
ackr3_human	186		ECL2	V => I	missense	0.0001978	24	121356	0	0.21	0.056
ackr3_human	187		ECL2	T => M	missense	3.296e-05	4	121356	0	0.06	0.87	PTM (Phosphorylation)
ackr3_human	189		ECL2	A => T	missense	1.648e-05	2	121356	0	0.69	0.114
ackr3_human	189		ECL2	A => P	missense	8.24e-06	1	121356	0	0.65	0.018
ackr3_human	189		ECL2	A => V	missense	4.12e-05	5	121360	0	0.36	0.188
ackr3_human	190		ECL2	S => T	missense	8.24e-06	1	121358	0	0.38	0.002
ackr3_human	191		ECL2	N => S	missense	8.24e-06	1	121358	0	0.65	0.01	PTM (N-linked Glycosylation)
ackr3_human	191		ECL2	N => K	missense	3.296e-05	4	121358	0	0.19	0.232	PTM (N-linked Glycosylation)
ackr3_human	192		ECL2	N => K	missense	8.24e-06	1	121360	0	0.03	0.61
ackr3_human	197	45.51x51	ECL2	R => W	missense	3.296e-05	4	121352	0	0.18	0.159
ackr3_human	197	45.51x51	ECL2	R => Q	missense	8.241e-06	1	121338	0	0.24	0.875
ackr3_human	198	45.52x52	ECL2	S => Y	missense	8.241e-06	1	121350	0	0.09	0.722	PTM (N-linked Glycosylation)
ackr3_human	199		ECL2	F => S	missense	9.889e-05	12	121346	0	0.37	0.063	PTM (Phosphorylation)
ackr3_human	202		ECL2	E => Q	missense	8.241e-06	1	121340	0	0.52	0.443	PTM (Phosphorylation)
ackr3_human	211	5.37x38	TM5	G => S	missense	2.473e-05	3	121326	0	0.11	0.166	PTM (Phosphorylation)
ackr3_human	217	5.43x44	TM5	V => I	missense	8.244e-06	1	121306	0	0.89	0.09	PTM (Phosphorylation)
ackr3_human	220	5.46x461	TM5	G => D	missense	8.243e-06	1	121316	0	0.0	1.0	PTM (Phosphorylation)
ackr3_human	226	5.52x52	TM5	S => F	missense	8.243e-06	1	121318	0	0.0	0.608	PTM (Phosphorylation)
ackr3_human	227	5.53x53	TM5	I => V	missense	8.243e-06	1	121320	0	0.61	0.019	PTM (Phosphorylation)
ackr3_human	229	5.55x55	TM5	A => T	missense	0.0001978	24	121310	0	0.14	0.29	PTM (Phosphorylation)
ackr3_human	230	5.56x56	TM5	V => I	missense	0.004649	564	121314	12	0.32	0.029	PTM (Ubiquitylation)
ackr3_human	238	5.64x64	TM5	A => V	missense	8.242e-06	1	121330	0	0.11	0.367	PTM (Phosphorylation) GP (contact)
ackr3_human	240	5.66x66	TM5	S => L	missense	8.242e-06	1	121330	0	0.23	0.105	PTM (Phosphorylation) GP (contact)
ackr3_human	241	5.67x67	TM5	A => V	missense	3.297e-05	4	121330	0	0.44	0.151	PTM (Phosphorylation) GP (contact)
ackr3_human	243		ICL3	S => G	missense	8.241e-06	1	121342	0	0.48	0.001	PTM (Phosphorylation)
ackr3_human	248	6.31x31	TM6	H => Q	missense	1.648e-05	2	121356	0	0.41	0.001	PTM (Phosphorylation)
ackr3_human	251	6.34x34	TM6	R => W	missense	4.944e-05	6	121356	0	0.0	0.973	PTM (Phosphorylation)
ackr3_human	251	6.34x34	TM6	R => Q	missense	0.0001895	23	121352	0	0.05	0.292	PTM (Phosphorylation)
ackr3_human	270	6.53x53	TM6	V => M	missense	8.238e-06	1	121390	0	0.05	0.276	PTM (Phosphorylation)
ackr3_human	271	6.54x54	TM6	A => V	missense	1.648e-05	2	121390	0	1.0	0.004	PTM (Acetylation)
ackr3_human	278	6.61x61	TM6	S => C	missense	2.472e-05	3	121382	0	0.14	0.967
ackr3_human	283		ECL3	I => V	missense	2.472e-05	3	121382	0	0.51	0.003	PTM (Phosphorylation)
ackr3_human	284		ECL3	P => T	missense	1.648e-05	2	121386	0	0.04	0.911
ackr3_human	284		ECL3	P => L	missense	8.239e-06	1	121376	0	0.02	0.956
ackr3_human	288	7.26x25	TM7	R => W	missense	0.0001565	19	121376	0	0.03	0.004	PTM (Phosphorylation)
ackr3_human	288	7.26x25	TM7	R => G	missense	8.239e-06	1	121376	0	0.42	0.003	PTM (Phosphorylation)
ackr3_human	288	7.26x25	TM7	R => Q	missense	1.648e-05	2	121378	0	0.68	0.002	PTM (Phosphorylation)
ackr3_human	292	7.30x29	TM7	A => T	missense	1.648e-05	2	121384	0	0.13	0.18	PTM (Phosphorylation)
ackr3_human	293	7.31x30	TM7	L => F	missense	8.239e-06	1	121378	0	0.01	0.656	PTM (Retinal protein)
ackr3_human	295	7.33x32	TM7	T => M	missense	1.648e-05	2	121376	0	0.1	0.623	PTM (Phosphorylation)
ackr3_human	296	7.34x33	TM7	A => T	missense	1.648e-05	2	121382	0	0.07	0.58	PTM (Retinal protein)
ackr3_human	298	7.36x35	TM7	H => Y	missense	0.00229	278	121386	1	0.0	1.0	PTM (Phosphorylation)
ackr3_human	304	7.42x41	TM7	S => L	missense	8.238e-06	1	121382	0	0.0	0.99	PTM (Phosphorylation)
ackr3_human	306	7.44x43	TM7	V => L	missense	8.238e-06	1	121384	0	0.81	0.019	PTM (Phosphorylation)
ackr3_human	310	7.48x48	TM7	V => I	missense	8.239e-06	1	121374	0	0.3	0.016	PTM (Phosphorylation)
ackr3_human	318	7.56x56	TM7	I => V	missense	8.239e-06	1	121372	0	0.27	0.005	PTM (Phosphorylation) GP (contact)
ackr3_human	320	8.48x48	H8	R => C	missense	8.24e-06	1	121364	0	0.0	0.932	PTM (Phosphorylation) GP (contact)
ackr3_human	321	8.49x49	H8	N => K	missense	8.24e-06	1	121366	0	0.14	0.008	PTM (Phosphorylation) GP (contact)
ackr3_human	325	8.53x53	H8	E => Q	missense	8.24e-06	1	121360	0	0.13	0.116	PTM (Phosphorylation)
ackr3_human	331	8.59x59	H8	I => V	missense	8.24e-06	1	121362	0	0.46	0.062	PTM (Phosphorylation)
ackr3_human	333	8.61x61	H8	K => R	missense	8.24e-06	1	121358	0	0.2	0.024	PTM (Phosphorylation)
ackr3_human	335		C-term	S => L	missense	8.241e-06	1	121338	0	0.02	0.982	PTM (Phosphorylation)
ackr3_human	336		C-term	A => V	missense	0.0004038	49	121338	0	0.15	0.344	PTM (Phosphorylation)
ackr3_human	340		C-term	L => F	missense	2.473e-05	3	121312	0	0.03	0.992	SodiumPocket MicroSwitch PTM (Retinal protein)
ackr3_human	352		C-term	T => M	missense	4.135e-05	5	120922	0	0.05	0.041	PTM (Phosphorylation)
ackr3_human	355		C-term	S => A	missense	1.658e-05	2	120652	0	0.05	0.077	PTM (Phosphorylation)
ackr3_human	356		C-term	A => T	missense	3.319e-05	4	120510	0	0.24	0.193	PTM (Phosphorylation)
ackr3_human	114	3.22x22	TM3	E => Ter	stop gained	8.237e-06	1	121398	0	None	None	PTM (Phosphorylation)
ackr4_human	10		N-term	D => N	missense	2.192e-05	2	91230	0	0.01	0.411	PTM (Phosphorylation)
ackr4_human	10		N-term	D => H	missense	1.096e-05	1	91230	0	0.0	0.043	PTM (Phosphorylation)
ackr4_human	10		N-term	D => V	missense	1.092e-05	1	91614	0	0.0	0.589	PTM (Phosphorylation)
ackr4_human	23		N-term	D => Y	missense	3.55e-05	4	112674	0	0.0	0.979
ackr4_human	30		N-term	I => T	missense	8.434e-06	1	118572	0	0.02	0.118	PTM (N-linked Glycosylation)
ackr4_human	33		N-term	K => N	missense	8.36e-06	1	119612	0	0.0	0.788	PTM (Phosphorylation)
ackr4_human	47	1.38x38	TM1	F => L	missense	0.0001569	19	121062	0	0.12	0.01	PTM (Phosphorylation)
ackr4_human	53	1.44x44	TM1	V => I	missense	8.257e-05	10	121114	0	0.45	0.004	PTM (Phosphorylation)
ackr4_human	108	3.21x21	TM3	G => E	missense	8.353e-06	1	119716	0	0.0	1.0	PTM (Acetylation)
ackr4_human	128	3.41x41	TM3	Q => H	missense	8.252e-06	1	121178	0	0.02	0.041	PTM (Phosphorylation)
ackr4_human	133	3.46x46	TM3	I => V	missense	8.248e-06	1	121238	0	0.12	0.779	SodiumPocket MicroSwitch PTM (Phosphorylation)
ackr4_human	137	3.50x50	TM3	R => S	missense	8.246e-06	1	121276	0	0.02	0.999	PTM (Phosphorylation) GP (contact)
ackr4_human	139	3.52x52	TM3	V => M	missense	8.245e-06	1	121280	0	0.22	0.116	PTM (Phosphorylation)
ackr4_human	145		ICL2	P => S	missense	4.948e-05	6	121262	0	0.63	0.032	PTM (Phosphorylation)
ackr4_human	148		ICL2	S => L	missense	8.251e-06	1	121202	0	0.28	0.079	PTM (Phosphorylation)
ackr4_human	150	4.38x38	TM4	V => M	missense	3.302e-05	4	121142	0	0.14	0.424	PTM (Phosphorylation)
ackr4_human	150	4.38x38	TM4	V => E	missense	0.001462	177	121104	0	0.98	0.175	PTM (Phosphorylation)
ackr4_human	152	4.40x40	TM4	K => I	missense	2.482e-05	3	120862	0	0.06	0.887	PTM (Phosphorylation)
ackr4_human	152	4.40x40	TM4	K => N	missense	4.141e-05	5	120756	0	0.01	0.734	PTM (Phosphorylation)
ackr4_human	159	4.47x47	TM4	F => L	missense	6.024e-05	7	116204	0	1.0	0.002	PTM (Phosphorylation)
ackr4_human	13		N-term	Y => Ter	stop gained	1.036e-05	1	96520	0	None	None	PTM (Phosphorylation)
ackr4_human	24		N-term	Y => Ter	stop gained	1.743e-05	2	114714	0	None	None
ackr4_human	123	3.36x36	TM3	F => CysfsTer20	frameshift	2.48e-05	3	120962	0	None	None
ackr4_human	138	3.51x51	TM3	Y => Ter	stop gained	1.649e-05	2	121276	0	None	None	PTM (Phosphorylation)
ackr4_human	176	4.64x65	TM4	Y => LeufsTer5	frameshift	1.109e-05	1	90184	0	None	None
ackr4_human	211	5.49x49	TM5	V => TyrfsTer18	frameshift	0.0001085	13	119816	0	None	None	PTM (Phosphorylation)
ackr4_human	215	5.53x53	TM5	I => LeufsTer14	frameshift	5.828e-05	7	120108	0	None	None	SodiumPocket MicroSwitch PTM (Phosphorylation)
ackr4_human	294	7.44x43	TM7	F => SerfsTer43	frameshift	8.239e-06	1	121370	0	None	None	PTM (Phosphorylation)
ackr4_human	303	7.53x53	TM7	Y => CysfsTer34	frameshift	1.656e-05	2	120790	0	None	None	PTM (Phosphorylation)
ccr1_human	348		C-term	E => A	missense	8.357e-06	1	119656	0	0.0	0.998	PTM (Phosphorylation)
ccr1_human	345		C-term	S => P	missense	7.474e-05	9	120420	0	0.01	0.183	PTM (Phosphorylation)
ccr1_human	344		C-term	P => A	missense	8.294e-06	1	120572	0	0.08	0.637	SodiumPocket MicroSwitch PTM (Phosphorylation)
ccr1_human	342		C-term	T => I	missense	8.279e-06	1	120794	0	0.49	0.003	PTM (Phosphorylation)
ccr1_human	335		C-term	R => K	missense	8.253e-06	1	121164	0	1.0	0.009	PTM (Phosphorylation)
ccr1_human	335		C-term	R => W	missense	8.252e-06	1	121184	0	0.01	0.847	PTM (Phosphorylation)
ccr1_human	333		C-term	V => M	missense	2.475e-05	3	121214	0	0.13	0.28	PTM (Phosphorylation)
ccr1_human	319		C-term	R => H	missense	0.0009644	117	121316	1	1.0	0.001	PTM (Phosphorylation)
ccr1_human	319		C-term	R => C	missense	4.946e-05	6	121310	0	0.1	0.35	PTM (Phosphorylation)
ccr1_human	319		C-term	R => G	missense	1.649e-05	2	121310	0	0.05	0.039	PTM (Phosphorylation)
ccr1_human	313	8.55x55	H8	R => Q	missense	9.067e-05	11	121322	0	0.3	0.018	PTM (Phosphorylation)
ccr1_human	313	8.55x55	H8	R => W	missense	8.242e-06	1	121326	0	0.21	0.007	PTM (Phosphorylation)
ccr1_human	312	8.54x54	H8	L => P	missense	8.243e-06	1	121322	0	0.0	0.999	PTM (Retinal protein)
ccr1_human	309	8.51x51	H8	R => Q	missense	1.649e-05	2	121300	0	0.14	0.041	PTM (Phosphorylation) GP (contact)
ccr1_human	309	8.51x51	H8	R => W	missense	1.649e-05	2	121314	0	0.0	0.091	PTM (Phosphorylation) GP (contact)
ccr1_human	308	8.50x50	H8	F => Y	missense	1.649e-05	2	121316	0	0.02	0.279	PTM (Palmitoylation)
ccr1_human	304	7.56x56	TM7	V => I	missense	2.473e-05	3	121310	0	0.05	0.018	PTM (Phosphorylation) GP (contact)
ccr1_human	302	7.54x54	TM7	A => T	missense	2.473e-05	3	121324	0	0.01	0.273	PTM (Phosphorylation)
ccr1_human	299	7.51x51	TM7	V => A	missense	1.649e-05	2	121316	0	0.0	0.827	PTM (Phosphorylation)
ccr1_human	299	7.51x51	TM7	V => M	missense	1.649e-05	2	121314	0	0.01	0.968	PTM (Phosphorylation)
ccr1_human	291	7.43x42	TM7	Y => H	missense	0.003009	365	121296	6	0.11	0.089	PTM (Phosphorylation)
ccr1_human	290	7.42x41	TM7	A => T	missense	0.0004948	60	121258	0	0.04	0.527	PTM (Phosphorylation)
ccr1_human	287	7.39x38	TM7	E => K	missense	1.649e-05	2	121266	0	0.04	0.874	PTM (Phosphorylation)
ccr1_human	286	7.38x37	TM7	T => M	missense	8.246e-06	1	121266	0	0.0	1.0	PTM (Methylation)
ccr1_human	286	7.38x37	TM7	T => A	missense	2.474e-05	3	121274	0	0.07	0.999	PTM (Methylation)
ccr1_human	272	7.24x23	TM7	E => D	missense	8.251e-06	1	121198	0	1.0	0.004	PTM (Phosphorylation)
ccr1_human	271		ECL3	H => R	missense	1.65e-05	2	121186	0	0.17	0.002	PTM (Acetylation)
ccr1_human	266	6.62x62	TM6	D => N	missense	8.258e-06	1	121102	0	0.43	0.026	PTM (Phosphorylation)
ccr1_human	253	6.49x49	TM6	T => I	missense	8.271e-06	1	120902	0	0.02	0.532	PTM (Phosphorylation)
ccr1_human	253	6.49x49	TM6	T => S	missense	8.271e-06	1	120902	0	0.01	0.883	PTM (Phosphorylation)
ccr1_human	245	6.41x41	TM6	M => T	missense	8.263e-06	1	121016	0	0.07	0.067	PTM (Phosphorylation)
ccr1_human	245	6.41x41	TM6	M => K	missense	8.263e-06	1	121016	0	0.0	0.82	PTM (Phosphorylation)
ccr1_human	238	6.34x34	TM6	V => I	missense	8.249e-06	1	121224	0	0.45	0.143	PTM (Phosphorylation)
ccr1_human	232		ICL3	E => K	missense	8.244e-06	1	121302	0	0.37	0.083	PTM (Phosphorylation)
ccr1_human	230		ICL3	P => Q	missense	6.594e-05	8	121322	0	0.16	0.934	PTM (Ubiquitylation)
ccr1_human	221	5.60x60	TM5	G => E	missense	8.239e-06	1	121376	0	0.17	0.075	PTM (Phosphorylation)
ccr1_human	214	5.53x53	TM5	V => L	missense	8.238e-06	1	121382	0	0.03	0.544	PTM (Phosphorylation)
ccr1_human	200	5.39x40	TM5	A => V	missense	8.239e-06	1	121378	0	0.23	1.0	PTM (Phosphorylation)
ccr1_human	197	5.36x37	TM5	L => P	missense	8.238e-06	1	121382	0	0.19	0.275
ccr1_human	193	5.32x33	TM5	R => Q	missense	8.239e-06	1	121376	0	0.52	0.011	PTM (Phosphorylation)
ccr1_human	190		ECL2	E => K	missense	8.239e-06	1	121378	0	0.35	0.036
ccr1_human	189		ECL2	H => Y	missense	8.238e-06	1	121386	0	0.76	0.006
ccr1_human	188		ECL2	P => S	missense	8.238e-06	1	121386	0	0.09	0.987	PTM (Phosphorylation)
ccr1_human	185	45.52x52	ECL2	L => F	missense	9.062e-05	11	121380	0	0.19	0.144
ccr1_human	181		ECL2	H => Y	missense	8.238e-06	1	121392	0	1.0	0.002
ccr1_human	176		ECL2	W => C	missense	8.238e-06	1	121394	0	0.03	0.866
ccr1_human	172	4.64x65	TM4	S => P	missense	8.238e-06	1	121392	0	0.19	0.023
ccr1_human	167	4.59x60	TM4	P => T	missense	8.238e-06	1	121392	0	0.01	1.0	PTM (Ubiquitylation)
ccr1_human	161	4.53x53	TM4	A => D	missense	8.238e-06	1	121394	0	0.0	0.987	PTM (Phosphorylation)
ccr1_human	159	4.51x51	TM4	A => V	missense	0.001442	175	121386	0	1.0	0.003	PTM (Phosphorylation)
ccr1_human	157	4.49x49	TM4	I => T	missense	8.238e-06	1	121386	0	1.0	0.001	PTM (Phosphorylation)
ccr1_human	155	4.47x47	TM4	I => T	missense	1.648e-05	2	121382	0	0.13	0.529	PTM (Phosphorylation)
ccr1_human	148	4.40x40	TM4	T => N	missense	1.648e-05	2	121380	0	0.02	0.851	PTM (Phosphorylation)
ccr1_human	147	4.39x39	TM4	V => I	missense	1.648e-05	2	121378	0	0.11	0.096	PTM (Phosphorylation)
ccr1_human	145	34.57x57	ICL2	R => W	missense	2.472e-05	3	121376	1	0.02	0.529	PTM (Phosphorylation) GP (contact)
ccr1_human	143	34.55x55	ICL2	R => W	missense	8.238e-06	1	121384	0	0.0	0.991	PTM (Phosphorylation) GP (contact)
ccr1_human	139	34.51x51	ICL2	V => M	missense	8.238e-06	1	121384	0	0.0	0.56	PTM (Phosphorylation) GP (contact)
ccr1_human	138	34.50x50	ICL2	A => T	missense	1.648e-05	2	121386	0	0.01	0.297	PTM (Phosphorylation) GP (contact)
ccr1_human	133	3.52x52	TM3	L => V	missense	8.238e-06	1	121390	0	0.02	0.724	SodiumPocket MicroSwitch PTM (Phosphorylation)
ccr1_human	129	3.48x48	TM3	I => T	missense	8.238e-06	1	121388	0	0.0	0.762	PTM (Phosphorylation)
ccr1_human	129	3.48x48	TM3	I => V	missense	8.238e-06	1	121384	0	0.18	0.039	PTM (Phosphorylation)
ccr1_human	118	3.37x37	TM3	Y => H	missense	1.648e-05	2	121390	0	0.02	0.998	PTM (Phosphorylation)
ccr1_human	110	3.29x29	TM3	S => F	missense	2.471e-05	3	121406	0	0.03	0.052	PTM (Disulfide bond)
ccr1_human	109	3.28x28	TM3	L => V	missense	8.237e-06	1	121406	0	0.12	0.606
ccr1_human	100	23.51x51	ECL1	V => A	missense	9.06e-05	11	121408	0	0.11	0.015
ccr1_human	100	23.51x51	ECL1	V => I	missense	8.237e-06	1	121408	0	0.47	0.007
ccr1_human	94	2.64x64	TM2	K => R	missense	1.647e-05	2	121406	0	0.31	0.023
ccr1_human	94	2.64x64	TM2	K => Q	missense	0.0006672	81	121406	0	0.31	0.027
ccr1_human	92	2.62x62	TM2	D => N	missense	3.295e-05	4	121404	0	0.2	0.015	PTM (Proteolytic Cleavage)
ccr1_human	86	2.56x56	TM2	T => M	missense	6.59e-05	8	121396	0	0.0	0.998	PTM (Proteolytic Cleavage)
ccr1_human	77	2.47x47	TM2	A => T	missense	8.239e-06	1	121374	0	0.02	1.0	PTM (N-linked Glycosylation)
ccr1_human	70	2.40x40	TM2	S => N	missense	0.0008157	99	121364	1	0.34	0.023	PTM (Proteolytic Cleavage)
ccr1_human	64	12.49x49	ICL1	R => S	missense	0.0005026	61	121366	0	0.02	1.0	PTM (Proteolytic Cleavage)
ccr1_human	62	1.60x60	TM1	Y => C	missense	8.24e-06	1	121366	0	0.34	0.968	PTM (Phosphorylation)
ccr1_human	61	1.59x59	TM1	Q => K	missense	4.12e-05	5	121368	0	1.0	0.015	PTM (Acetylation)
ccr1_human	58	1.56x56	TM1	V => I	missense	2.472e-05	3	121366	0	0.91	0.507	PTM (Phosphorylation)
ccr1_human	53	1.51x51	TM1	I => N	missense	8.24e-06	1	121360	0	0.02	0.446	PTM (Phosphorylation)
ccr1_human	52	1.50x50	TM1	N => K	missense	8.24e-06	1	121360	0	0.0	0.989	PTM (Phosphorylation)
ccr1_human	39	1.37x37	TM1	P => S	missense	8.252e-06	1	121184	0	0.02	0.548	PTM (Phosphorylation)
ccr1_human	31	1.29x29	TM1	A => V	missense	2.486e-05	3	120690	0	0.24	0.08	PTM (Phosphorylation)
ccr1_human	31	1.29x29	TM1	A => D	missense	8.286e-06	1	120690	0	0.57	0.03	PTM (Phosphorylation)
ccr1_human	30	1.28x28	TM1	R => G	missense	2.488e-05	3	120592	0	0.03	0.804	PTM (N-linked Glycosylation)
ccr1_human	29	1.27x27	TM1	E => K	missense	8.306e-06	1	120400	0	0.01	0.08	PTM (Phosphorylation)
ccr1_human	23		N-term	P => L	missense	8.409e-06	1	118924	0	0.08	0.192
ccr1_human	13		N-term	T => N	missense	8.629e-06	1	115882	0	0.02	0.0	PTM (Phosphorylation)
ccr1_human	12		N-term	T => M	missense	5.197e-05	6	115454	0	0.23	0.0	PTM (Phosphorylation)
ccr1_human	9		N-term	D => Y	missense	8.73e-06	1	114548	0	0.07	0.0
ccr1_human	3		N-term	T => I	missense	8.857e-06	1	112900	0	0.34	0.0	PTM (Phosphorylation)
ccr1_human	158	4.50x50	TM4	W => GlyfsTer44	frameshift	8.239e-06	1	121380	0	None	None	PTM (Phosphorylation)
ccr10_human	358		C-term	L => P	missense	1.898e-05	2	105356	0	nan	0.062	SodiumPocket MicroSwitch PTM (Phosphorylation)
ccr10_human	357		C-term	S => T	missense	0.001083	114	105252	2	nan	0.097	PTM (Phosphorylation)
ccr10_human	357		C-term	S => G	missense	9.5e-06	1	105262	0	0.01	0.097	PTM (Phosphorylation)
ccr10_human	355		C-term	T => N	missense	8.57e-05	9	105022	0	0.02	0.991	PTM (Phosphorylation)
ccr10_human	355		C-term	T => P	missense	9.522e-06	1	105022	0	0.01	0.991	PTM (Phosphorylation)
ccr10_human	350		C-term	S => L	missense	3.835e-05	4	104316	0	0.02	0.977	PTM (Phosphorylation)
ccr10_human	349		C-term	C => R	missense	9.625e-06	1	103894	0	0.02	0.991	PTM (Phosphorylation)
ccr10_human	342		C-term	R => C	missense	1.007e-05	1	99280	0	0.06	0.72	PTM (Phosphorylation)
ccr10_human	340		C-term	C => Y	missense	2.032e-05	2	98438	0	0.0	0.991	SodiumPocket MicroSwitch PTM (Retinal protein)
ccr10_human	339		C-term	G => S	missense	2.047e-05	2	97686	0	0.41	0.0	PTM (Phosphorylation)
ccr10_human	338		C-term	R => L	missense	1.027e-05	1	97418	0	0.28	0.011	PTM (Dephosphorylation)
ccr10_human	334	8.67x67	H8	P => L	missense	1.049e-05	1	95350	0	0.27	0.006	PTM (Phosphorylation)
ccr10_human	333	8.66x66	H8	G => R	missense	9.455e-05	9	95192	0	0.65	0.001	PTM (Phosphorylation)
ccr10_human	329	8.62x62	H8	S => G	missense	3.191e-05	3	94028	0	1.0	0.0	PTM (Phosphorylation)
ccr10_human	326	8.59x59	H8	R => Q	missense	8.547e-05	8	93604	0	0.15	0.001	PTM (Phosphorylation)
ccr10_human	326	8.59x59	H8	R => W	missense	0.01033	968	93714	26	0.0	0.425	PTM (Phosphorylation)
ccr10_human	318	8.51x51	H8	R => C	missense	2.105e-05	2	95020	0	0.0	0.993	PTM (Phosphorylation) GP (contact)
ccr10_human	312	7.55x55	TM7	F => L	missense	1.024e-05	1	97654	0	0.0	0.993	PTM (Retinal protein) GP (contact)
ccr10_human	308	7.51x51	TM7	V => I	missense	1.011e-05	1	98918	0	0.41	0.034	PTM (Palmitoylation)
ccr10_human	306	7.49x49	TM7	N => S	missense	1.005e-05	1	99458	0	0.0	0.999	PTM (Phosphorylation)
ccr10_human	299	7.42x41	TM7	A => G	missense	9.883e-06	1	101184	0	0.01	0.796	PTM (Phosphorylation)
ccr10_human	287	7.30x29	TM7	R => H	missense	1.989e-05	2	100552	0	0.02	0.118	PTM (Phosphorylation)
ccr10_human	284	7.27x26	TM7	A => D	missense	1.032e-05	1	96940	0	0.2	0.309
ccr10_human	282	7.25x24	TM7	C => F	missense	4.278e-05	4	93510	0	0.0	1.0	PTM (Ubiquitylation)
ccr10_human	281	7.24x23	TM7	S => R	missense	2.141e-05	2	93416	0	0.02	0.85	PTM (Phosphorylation)
ccr10_human	279		ECL3	E => K	missense	3.287e-05	3	91262	0	0.07	0.574	PTM (Methylation)
ccr10_human	267	6.55x55	TM6	L => M	missense	4.894e-05	4	81732	0	0.01	0.987	PTM (Phosphorylation)
ccr10_human	250	6.38x38	TM6	V => A	missense	3.942e-05	2	50736	0	0.01	0.872	PTM (Phosphorylation)
ccr10_human	233	5.64x64	TM5	T => M	missense	4.002e-05	1	24988	0	0.0	0.995	PTM (Phosphorylation) GP (contact)
ccr10_human	232	5.63x63	TM5	R => C	missense	3.975e-05	1	25158	0	0.0	0.999	PTM (Phosphorylation)
ccr10_human	222	5.53x53	TM5	V => I	missense	3.588e-05	1	27870	0	0.08	0.523	PTM (Phosphorylation)
ccr10_human	213	5.44x45	TM5	A => V	missense	0.0002397	8	33370	0	1.0	0.003	PTM (Phosphorylation)
ccr10_human	206	5.37x38	TM5	A => G	missense	0.0002018	8	39652	0	0.25	0.016	PTM (Phosphorylation)
ccr10_human	205	5.36x37	TM5	G => W	missense	2.392e-05	1	41806	0	0.01	1.0	PTM (Phosphorylation)
ccr10_human	202	5.33x34	TM5	T => R	missense	2.218e-05	1	45094	0	0.04	0.87	PTM (Phosphorylation)
ccr10_human	190		ECL2	R => H	missense	1.428e-05	1	70040	0	0.53	0.133
ccr10_human	185		ECL2	R => W	missense	1.192e-05	1	83920	0	0.01	0.994
ccr10_human	182		ECL2	D => Y	missense	1.083e-05	1	92338	0	0.09	0.949	PTM (Phosphorylation)
ccr10_human	165	4.49x49	TM4	V => M	missense	9.776e-06	1	102288	0	0.01	0.888	PTM (Phosphorylation)
ccr10_human	164	4.48x48	TM4	I => V	missense	9.796e-06	1	102082	0	0.78	0.001
ccr10_human	161	4.45x45	TM4	V => A	missense	1.005e-05	1	99528	0	0.56	0.003	PTM (Phosphorylation)
ccr10_human	157	4.41x41	TM4	R => C	missense	1.112e-05	1	89888	0	0.16	0.806	PTM (Phosphorylation)
ccr10_human	154	4.38x38	TM4	T => I	missense	1.227e-05	1	81490	0	0.09	0.069	PTM (Phosphorylation)
ccr10_human	149		ICL2	G => W	missense	3.007e-05	2	66516	0	0.19	0.917	PTM (Phosphorylation)
ccr10_human	148		ICL2	A => D	missense	1.524e-05	1	65622	0	0.04	0.487	PTM (Phosphorylation)
ccr10_human	142	3.54x54	TM3	I => F	missense	1.812e-05	1	55192	0	0.07	0.059	PTM (Phosphorylation) GP (contact)
ccr10_human	138	3.50x50	TM3	R => H	missense	2.122e-05	1	47116	0	0.0	1.0	PTM (Phosphorylation) GP (contact)
ccr10_human	127	3.39x39	TM3	G => D	missense	3.146e-05	1	31784	0	0.01	1.0	PTM (Phosphorylation)
ccr10_human	125	3.37x37	TM3	H => L	missense	3.399e-05	1	29424	0	0.04	0.472	PTM (Phosphorylation)
ccr10_human	112	3.24x24	TM3	T => I	missense	0.0004006	8	19968	0	0.33	0.237	PTM (Phosphorylation)
ccr10_human	85	2.47x47	TM2	A => T	missense	5.127e-05	1	19506	0	0.0	1.0	PTM (Phosphorylation)
ccr10_human	81	2.43x43	TM2	L => V	missense	5.095e-05	1	19628	0	0.0	0.999	PTM (Phosphorylation)
ccr10_human	74	2.36x36	TM2	R => C	missense	4.272e-05	1	23410	0	0.04	0.025	PTM (Phosphorylation)
ccr10_human	71	12.49x49	ICL1	R => C	missense	3.746e-05	1	26694	0	0.0	0.79	PTM (Methylation)
ccr10_human	53	1.44x44	TM1	A => T	missense	1.288e-05	1	77614	0	0.08	0.046	PTM (Phosphorylation)
ccr10_human	51	1.42x42	TM1	V => M	missense	4.726e-05	4	84636	0	0.01	0.878	PTM (Phosphorylation)
ccr10_human	41	1.32x32	TM1	R => Q	missense	9.484e-06	1	105446	0	0.04	0.742	PTM (Phosphorylation)
ccr10_human	36	1.27x27	TM1	V => I	missense	9.011e-06	1	110976	0	0.08	0.279	PTM (N-linked Glycosylation)
ccr10_human	27		N-term	L => P	missense	9.067e-06	1	110290	0	0.0	0.85	PTM (Phosphorylation)
ccr10_human	25		N-term	E => G	missense	4.556e-05	5	109744	0	0.53	0.0	PTM (Phosphorylation)
ccr10_human	23		N-term	S => L	missense	9.183e-06	1	108902	0	0.12	0.004
ccr10_human	20		N-term	D => E	missense	1.85e-05	2	108104	0	0.77	0.002	PTM (Phosphorylation)
ccr10_human	20		N-term	D => N	missense	1.856e-05	2	107780	0	0.13	0.031	PTM (Phosphorylation)
ccr10_human	17		N-term	D => N	missense	1.868e-05	2	107088	0	0.18	0.001	PTM (Phosphorylation)
ccr10_human	3		N-term	T => M	missense	0.0009901	118	119176	2	nan	0.997	PTM (Phosphorylation)
ccr10_human	360		C-term	W => Ter	stop gained	9.483e-06	1	105448	0	None	None	SodiumPocket MicroSwitch PTM (Phosphorylation)
ccr10_human	207	5.38x39	TM5	S => ArgfsTer162	frameshift	2.633e-05	1	37980	0	None	None	SodiumPocket MicroSwitch
ccr10_human	184		ECL2	Q => Ter	stop gained	1.159e-05	1	86272	0	None	None	PTM (Phosphorylation)
ccr10_human	156	4.40x40	TM4	G => ArgfsTer211	frameshift	1.091e-05	1	91666	0	None	None	PTM (Phosphorylation)
ccr10_human	144	3.56x56	TM3	R => Ter	stop gained	1.717e-05	1	58238	0	None	None	PTM (Acetylation) GP (contact)
ccr10_human	32		N-term	Y => LeufsTer337	frameshift	8.966e-06	1	111528	0	None	None	PTM (Phosphorylation)
ccr2_human	2		N-term	L => M	missense	8.372e-06	1	119442	0	nan	0.642	PTM (N-linked Glycosylation)
ccr2_human	2		N-term	L => P	missense	8.363e-06	1	119572	0	nan	0.006	PTM (N-linked Glycosylation)
ccr2_human	6		N-term	R => C	missense	1.666e-05	2	120084	0	nan	0.27	PTM (Phosphorylation)
ccr2_human	6		N-term	R => H	missense	3.329e-05	4	120152	0	0.78	0.0	PTM (Phosphorylation)
ccr2_human	7		N-term	S => P	missense	8.32e-06	1	120194	0	nan	0.042	PTM (Phosphorylation)
ccr2_human	8		N-term	R => Q	missense	8.315e-06	1	120258	0	nan	0.136	PTM (Phosphorylation)
ccr2_human	10		N-term	I => V	missense	8.311e-06	1	120318	0	1.0	0.001	PTM (Phosphorylation)
ccr2_human	11		N-term	R => G	missense	8.31e-06	1	120334	0	0.12	0.05	PTM (N-linked Glycosylation)
ccr2_human	15		N-term	E => K	missense	5.815e-05	7	120386	0	0.54	0.053	PTM (Phosphorylation)
ccr2_human	17		N-term	G => S	missense	8.305e-06	1	120406	0	0.74	0.003	PTM (Phosphorylation)
ccr2_human	21		N-term	T => A	missense	8.302e-06	1	120456	0	0.03	0.41	PTM (Sulfation)
ccr2_human	24		N-term	F => L	missense	2.49e-05	3	120486	0	0.05	0.009
ccr2_human	25		N-term	D => N	missense	8.3e-06	1	120484	0	0.06	0.103	PTM (Phosphorylation)
ccr2_human	25		N-term	D => E	missense	8.299e-06	1	120494	0	0.11	0.111	PTM (Phosphorylation)
ccr2_human	29		N-term	G => S	missense	8.292e-06	1	120600	0	1.0	0.003	PTM (Phosphorylation)
ccr2_human	41	1.31x31	TM1	G => R	missense	1.654e-05	2	120934	0	0.01	0.66	PTM (Phosphorylation)
ccr2_human	42	1.32x32	TM1	A => V	missense	2.48e-05	3	120948	0	0.05	0.103	PTM (Phosphorylation)
ccr2_human	44	1.34x34	TM1	L => V	missense	8.267e-05	10	120958	0	0.14	0.153
ccr2_human	47	1.37x37	TM1	P => S	missense	1.653e-05	2	120988	0	0.01	0.212	PTM (Phosphorylation)
ccr2_human	47	1.37x37	TM1	P => L	missense	6.613e-05	8	120976	0	0.09	0.035	PTM (Phosphorylation)
ccr2_human	48	1.38x38	TM1	L => F	missense	1.653e-05	2	121002	0	0.02	0.408	PTM (Phosphorylation)
ccr2_human	50	1.40x40	TM1	S => L	missense	2.479e-05	3	121016	0	0.01	0.716	PTM (Phosphorylation)
ccr2_human	55	1.45x45	TM1	F => L	missense	8.26e-06	1	121068	0	0.19	0.005	PTM (Proteolytic Cleavage)
ccr2_human	57	1.47x47	TM1	F => C	missense	8.259e-06	1	121084	0	0.0	0.88	PTM (Phosphorylation)
ccr2_human	61	1.51x51	TM1	M => R	missense	8.257e-06	1	121114	0	0.02	0.611	PTM (Acetylation)
ccr2_human	63	1.53x53	TM1	V => I	missense	8.256e-06	1	121118	0	0.0	0.99	PTM (Phosphorylation)
ccr2_human	64	1.54x54	TM1	V => I	missense	0.1267	15350	121140	1192	0.21	0.106	PTM (Proteolytic Cleavage)
ccr2_human	65	1.55x55	TM1	L => F	missense	4.126e-05	5	121180	0	0.01	0.517	PTM (Phosphorylation)
ccr2_human	69	1.59x59	TM1	N => D	missense	1.65e-05	2	121176	0	0.02	0.033	PTM (Proteolytic Cleavage)
ccr2_human	70	1.60x60	TM1	C => Y	missense	1.65e-05	2	121178	0	1.0	0.027	PTM (Proteolytic Cleavage)
ccr2_human	75	2.37x37	TM2	C => R	missense	8.252e-06	1	121176	0	0.03	0.0	PTM (Proteolytic Cleavage)
ccr2_human	87	2.49x49	TM2	S => T	missense	8.26e-06	1	121064	0	0.0	0.997
ccr2_human	90	2.52x52	TM2	L => P	missense	8.264e-06	1	121000	0	0.0	0.994	PTM (Disulfide bond)
ccr2_human	92	2.54x54	TM2	L => V	missense	8.266e-06	1	120980	0	0.49	0.074	PTM (Proteolytic Cleavage)
ccr2_human	93	2.55x55	TM2	I => T	missense	8.268e-06	1	120950	0	0.0	0.315
ccr2_human	95	2.57x57	TM2	L => V	missense	8.271e-06	1	120904	0	0.03	0.536
ccr2_human	95	2.57x57	TM2	L => P	missense	8.271e-06	1	120900	0	0.0	0.994
ccr2_human	102	2.64x64	TM2	A => T	missense	1.655e-05	2	120816	0	0.05	0.461
ccr2_human	104	2.66x66	TM2	N => K	missense	8.278e-06	1	120808	0	0.16	0.063	PTM (Phosphorylation)
ccr2_human	105	23.49x49	ECL1	E => K	missense	8.278e-06	1	120800	0	0.23	0.41	PTM (Phosphorylation)
ccr2_human	111	3.23x23	TM3	A => T	missense	8.279e-06	1	120790	0	0.17	0.117
ccr2_human	123	3.35x35	TM3	G => S	missense	8.272e-06	1	120896	0	0.01	0.918
ccr2_human	125	3.37x37	TM3	F => L	missense	8.269e-06	1	120936	0	0.01	0.902	PTM (Phosphorylation)
ccr2_human	126	3.38x38	TM3	G => A	missense	8.269e-06	1	120938	0	0.05	0.192	PTM (Phosphorylation)
ccr2_human	127	3.39x39	TM3	G => R	missense	1.653e-05	2	120978	0	0.01	0.996	PTM (Phosphorylation)
ccr2_human	127	3.39x39	TM3	G => V	missense	1.653e-05	2	121002	0	0.01	0.996	PTM (Phosphorylation)
ccr2_human	129	3.41x41	TM3	F => L	missense	8.261e-06	1	121054	0	0.04	0.253	PTM (Phosphorylation)
ccr2_human	130	3.42x42	TM3	F => L	missense	8.259e-06	1	121074	0	0.0	0.766	PTM (Phosphorylation)
ccr2_human	131	3.43x43	TM3	I => V	missense	8.259e-06	1	121084	0	0.01	0.812	PTM (Phosphorylation)
ccr2_human	132	3.44x44	TM3	I => M	missense	3.303e-05	4	121114	0	0.23	0.961	PTM (Ubiquitylation)
ccr2_human	137	3.49x49	TM3	D => N	missense	1.65e-05	2	121176	0	0.0	0.969	PTM (Phosphorylation)
ccr2_human	138	3.50x50	TM3	R => K	missense	8.251e-06	1	121200	0	0.0	0.912	PTM (Phosphorylation) GP (contact)
ccr2_human	141	3.53x53	TM3	A => V	missense	1.65e-05	2	121234	0	0.01	0.964	PTM (Phosphorylation) GP (contact)
ccr2_human	142	3.54x54	TM3	I => V	missense	8.248e-06	1	121236	0	0.07	0.447	PTM (Phosphorylation) GP (contact)
ccr2_human	145	34.50x50	ICL2	A => V	missense	1.65e-05	2	121230	0	0.04	0.913	PTM (Phosphorylation) GP (contact)
ccr2_human	153	4.38x38	TM4	T => M	missense	9.9e-05	12	121210	0	0.0	0.996	PTM (Phosphorylation)
ccr2_human	155	4.40x40	TM4	T => I	missense	1.65e-05	2	121204	0	0.01	0.806	PTM (Phosphorylation)
ccr2_human	159	4.44x44	TM4	V => L	missense	9.077e-05	11	121180	0	0.27	0.02	PTM (Phosphorylation)
ccr2_human	182		ECL2	Q => R	missense	8.292e-06	1	120592	0	0.02	0.178	PTM (Phosphorylation)
ccr2_human	183		ECL2	K => E	missense	8.293e-06	1	120580	0	0.8	0.013	PTM (N-linked Glycosylation)
ccr2_human	188		ECL2	Y => H	missense	3.32e-05	4	120470	0	0.38	0.02	PTM (Phosphorylation)
ccr2_human	189		ECL2	V => I	missense	8.302e-06	1	120450	0	0.12	0.01
ccr2_human	192	45.52x52	ECL2	P => L	missense	8.303e-06	1	120442	0	0.53	0.22
ccr2_human	196	5.32x33	TM5	R => Q	missense	5.813e-05	7	120430	0	0.49	0.003	PTM (Phosphorylation)
ccr2_human	205	5.41x42	TM5	M => T	missense	2.491e-05	3	120420	0	0.12	0.065	PTM (Phosphorylation)
ccr2_human	205	5.41x42	TM5	M => I	missense	8.304e-05	10	120422	0	0.01	0.425	PTM (Phosphorylation)
ccr2_human	210	5.46x461	TM5	G => R	missense	8.302e-06	1	120448	0	0.0	0.983
ccr2_human	212	5.48x48	TM5	V => F	missense	8.301e-06	1	120464	0	0.07	0.183	PTM (Phosphorylation)
ccr2_human	214	5.50x50	TM5	P => L	missense	8.3e-06	1	120482	0	0.0	1.0	PTM (Phosphorylation)
ccr2_human	223	5.59x59	TM5	S => L	missense	8.299e-06	1	120500	0	0.01	0.858	PTM (Phosphorylation)
ccr2_human	230	5.66x66	TM5	L => F	missense	1.66e-05	2	120502	0	0.07	0.17	PTM (Ubiquitylation) GP (contact)
ccr2_human	230	5.66x66	TM5	L => I	missense	8.299e-06	1	120502	0	0.03	0.395	PTM (Ubiquitylation) GP (contact)
ccr2_human	231	5.67x67	TM5	R => L	missense	8.298e-06	1	120516	0	0.0	0.478	PTM (Acetylation) GP (contact)
ccr2_human	231	5.67x67	TM5	R => Q	missense	4.149e-05	5	120516	0	0.08	0.358	PTM (Acetylation) GP (contact)
ccr2_human	233		ICL3	R => Q	missense	2.489e-05	3	120514	0	0.07	0.85	PTM (Phosphorylation)
ccr2_human	234		ICL3	N => K	missense	8.297e-06	1	120528	0	0.0	0.903	PTM (Phosphorylation)
ccr2_human	247	6.39x39	TM6	T => A	missense	8.293e-06	1	120590	0	0.6	0.006	PTM (Phosphorylation)
ccr2_human	249	6.41x41	TM6	M => K	missense	0.0004727	57	120594	0	0.0	0.962	PTM (Phosphorylation)
ccr2_human	249	6.41x41	TM6	M => T	missense	1.658e-05	2	120594	0	0.06	0.944	PTM (Phosphorylation)
ccr2_human	272	6.64x64	TM6	F => L	missense	8.281e-06	1	120762	0	0.54	0.033	PTM (Phosphorylation)
ccr2_human	273	6.65x65	TM6	G => S	missense	6.624e-05	8	120778	0	0.42	0.271	PTM (Phosphorylation)
ccr2_human	273	6.65x65	TM6	G => C	missense	1.656e-05	2	120778	0	0.18	0.981	PTM (Phosphorylation)
ccr2_human	273	6.65x65	TM6	G => V	missense	4.967e-05	6	120800	0	0.55	0.159	PTM (Phosphorylation)
ccr2_human	289	7.37x36	TM7	V => A	missense	8.27e-06	1	120912	0	0.11	0.6	PTM (Phosphorylation)
ccr2_human	292	7.40x39	TM7	T => A	missense	8.27e-06	1	120916	0	0.21	0.097	PTM (Phosphorylation)
ccr2_human	295	7.43x42	TM7	M => V	missense	8.27e-06	1	120914	0	0.1	0.081	PTM (Phosphorylation)
ccr2_human	295	7.43x42	TM7	M => R	missense	8.27e-06	1	120916	0	0.06	0.707	PTM (Phosphorylation)
ccr2_human	298	7.46x46	TM7	C => R	missense	8.27e-06	1	120918	0	0.0	0.997	PTM (Phosphorylation)
ccr2_human	302	7.50x50	TM7	P => L	missense	8.27e-06	1	120912	0	0.0	1.0	PTM (Phosphorylation)
ccr2_human	303	7.51x51	TM7	I => V	missense	8.27e-06	1	120916	0	1.0	0.116	PTM (Phosphorylation)
ccr2_human	303	7.51x51	TM7	I => N	missense	1.654e-05	2	120916	0	0.0	0.988	PTM (Phosphorylation)
ccr2_human	310	8.48x48	H8	E => K	missense	3.309e-05	4	120900	0	0.03	0.78	PTM (Phosphorylation) GP (contact)
ccr2_human	313	8.51x51	H8	R => K	missense	1.655e-05	2	120872	0	0.16	0.589	PTM (Phosphorylation) GP (contact)
ccr2_human	313	8.51x51	H8	R => T	missense	8.273e-06	1	120872	0	0.0	0.979	PTM (Phosphorylation) GP (contact)
ccr2_human	314	8.52x52	H8	S => G	missense	8.274e-06	1	120860	0	0.01	0.045	PTM (Phosphorylation)
ccr2_human	314	8.52x52	H8	S => N	missense	8.278e-05	10	120808	0	0.11	0.003	PTM (Phosphorylation)
ccr2_human	316	8.54x54	H8	F => L	missense	0.0004099	49	119538	0	1.0	0.0	PTM (Phosphorylation)
ccr2_human	319	8.57x57	H8	A => V	missense	8.344e-06	1	119840	0	0.35	0.011	PTM (Phosphorylation)
ccr2_human	321		C-term	G => C	missense	8.336e-06	1	119968	0	0.15	0.015	PTM (Phosphorylation)
ccr2_human	322		C-term	C => Y	missense	1.666e-05	2	120074	0	1.0	0.0	PTM (Phosphorylation)
ccr2_human	329		C-term	K => T	missense	2.495e-05	3	120222	0	0.38	0.021	PTM (Phosphorylation)
ccr2_human	331		C-term	V => L	missense	8.318e-06	1	120226	0	0.81	0.001	PTM (Phosphorylation)
ccr2_human	335		C-term	P => A	missense	1.663e-05	2	120236	0	0.54	0.004	PTM (Phosphorylation)
ccr2_human	338		C-term	R => K	missense	8.317e-06	1	120236	0	0.39	0.0	PTM (Dephosphorylation)
ccr2_human	339		C-term	P => Q	missense	3.327e-05	4	120234	0	0.29	0.023	PTM (Phosphorylation)
ccr2_human	346		C-term	T => P	missense	8.317e-06	1	120242	0	0.03	0.068	PTM (Phosphorylation)
ccr2_human	346		C-term	T => I	missense	8.317e-06	1	120234	0	0.05	0.003	PTM (Phosphorylation)
ccr2_human	348		C-term	Q => R	missense	1.663e-05	2	120240	0	0.34	0.004	PTM (Phosphorylation)
ccr2_human	350		C-term	L => F	missense	8.317e-06	1	120238	0	0.7	0.029	PTM (Phosphorylation)
ccr2_human	351		C-term	L => V	missense	2.495e-05	3	120240	0	1.0	0.002	PTM (Phosphorylation)
ccr2_human	352		C-term	D => N	missense	1.663e-05	2	120234	0	0.51	0.007	PTM (Phosphorylation)
ccr2_human	353		C-term	G => V	missense	8.317e-06	1	120236	0	0.06	0.0	PTM (Phosphorylation)
ccr2_human	354		C-term	R => H	missense	4.159e-05	5	120234	0	0.04	0.0	SodiumPocket MicroSwitch PTM (Phosphorylation)
ccr2_human	355		C-term	G => E	missense	0.001397	168	120230	2	0.6	0.0	PTM (Phosphorylation)
ccr2_human	356		C-term	K => T	missense	8.318e-06	1	120218	0	0.08	0.003	PTM (Phosphorylation)
ccr2_human	363		C-term	A => G	missense	8.325e-06	1	120126	0	nan	0.0	PTM (Phosphorylation)
ccr2_human	367		C-term	S => G	missense	8.332e-06	1	120016	0	nan	0.153	PTM (Phosphorylation)
ccr2_human	374		C-term	A => T	missense	8.371e-06	1	119464	0	nan	0.483	PTM (Phosphorylation)
ccr2_human	127	3.39x39	TM3	G => Ter	stop gained	1.653e-05	2	120978	0	None	None	PTM (Phosphorylation)
ccr2_human	223	5.59x59	TM5	S => Ter	stop gained	8.299e-06	1	120500	0	None	None	PTM (Phosphorylation)
ccr2_human	237	6.29x29	TM6	K => Ter	stop gained	8.296e-06	1	120540	0	None	None	PTM (Phosphorylation) GP (contact)
ccr2_human	321		C-term	G => Ter	stop gained	0.0001331	16	120220	0	None	None	PTM (Phosphorylation)
ccr2_human	369		C-term	Q => Ter	stop gained	8.339e-06	1	119920	0	None	None	PTM (Acetylation)
ccr3_human	3		N-term	T => A	missense	4.265e-05	5	117240	0	0.09	0.016	PTM (Phosphorylation)
ccr3_human	10		N-term	T => I	missense	8.318e-06	1	120220	0	0.4	0.086	PTM (Phosphorylation)
ccr3_human	11		N-term	F => I	missense	8.305e-06	1	120404	0	0.32	0.012	PTM (N-linked Glycosylation)
ccr3_human	11		N-term	F => S	missense	8.302e-06	1	120446	0	0.35	0.022	PTM (N-linked Glycosylation)
ccr3_human	12		N-term	G => D	missense	6.637e-05	8	120544	0	0.7	0.021	PTM (Phosphorylation)
ccr3_human	13		N-term	T => I	missense	1.658e-05	2	120654	0	0.02	0.031	PTM (Phosphorylation)
ccr3_human	15		N-term	S => P	missense	8.274e-06	1	120866	0	0.31	0.001	PTM (Phosphorylation)
ccr3_human	15		N-term	S => F	missense	5.791e-05	7	120882	0	0.61	0.002	PTM (Phosphorylation)
ccr3_human	18		N-term	D => G	missense	0.0001405	17	121028	1	0.27	0.208	PTM (Phosphorylation)
ccr3_human	20		N-term	V => M	missense	0.000157	19	121056	0	0.22	0.01	PTM (Phosphorylation)
ccr3_human	21		N-term	G => D	missense	6.608e-05	8	121060	0	0.18	0.138	PTM (Sulfation)
ccr3_human	25		N-term	E => V	missense	1.652e-05	2	121080	0	0.11	0.02	PTM (Phosphorylation)
ccr3_human	35	1.33x33	TM1	Q => E	missense	4.13e-05	5	121068	0	0.12	0.373	PTM (N-linked Glycosylation)
ccr3_human	35	1.33x33	TM1	Q => R	missense	8.259e-06	1	121086	0	0.42	0.029	PTM (N-linked Glycosylation)
ccr3_human	39	1.37x37	TM1	P => L	missense	0.00366	443	121046	1	0.05	0.157	PTM (Phosphorylation)
ccr3_human	46	1.44x44	TM1	T => S	missense	1.651e-05	2	121140	0	0.0	0.085	PTM (O-GalNAc)
ccr3_human	48	1.46x46	TM1	G => C	missense	8.253e-06	1	121168	0	0.0	0.994	PTM (Phosphorylation)
ccr3_human	52	1.50x50	TM1	N => S	missense	8.25e-06	1	121208	0	0.0	0.994	PTM (Phosphorylation)
ccr3_human	53	1.51x51	TM1	V => M	missense	8.249e-06	1	121220	0	0.53	0.196	PTM (Phosphorylation)
ccr3_human	54	1.52x52	TM1	V => M	missense	8.249e-06	1	121232	0	0.12	0.062	PTM (Phosphorylation)
ccr3_human	56	1.54x54	TM1	V => L	missense	2.474e-05	3	121274	0	0.06	0.168	PTM (Phosphorylation)
ccr3_human	58	1.56x56	TM1	I => N	missense	8.245e-06	1	121280	0	0.0	0.987	PTM (Phosphorylation)
ccr3_human	60	1.58x58	TM1	I => T	missense	8.244e-06	1	121306	0	0.38	0.015	PTM (Phosphorylation)
ccr3_human	62	1.60x60	TM1	Y => H	missense	8.242e-06	1	121326	0	0.12	0.346	PTM (Phosphorylation)
ccr3_human	63	12.48x48	ICL1	R => G	missense	8.242e-06	1	121326	0	0.0	0.049	PTM (Phosphorylation)
ccr3_human	64	12.49x49	ICL1	R => S	missense	8.241e-06	1	121342	0	0.0	0.938	PTM (Proteolytic Cleavage)
ccr3_human	75	2.45x45	TM2	N => S	missense	8.239e-06	1	121380	0	0.01	0.951	PTM (Proteolytic Cleavage)
ccr3_human	75	2.45x45	TM2	N => K	missense	8.238e-06	1	121386	0	0.0	0.997	PTM (Proteolytic Cleavage)
ccr3_human	79	2.49x49	TM2	S => L	missense	2.471e-05	3	121392	0	0.0	0.983
ccr3_human	82	2.52x52	TM2	L => F	missense	8.237e-06	1	121398	0	0.01	0.996	PTM (Proteolytic Cleavage)
ccr3_human	83	2.53x53	TM2	F => L	missense	1.648e-05	2	121396	0	0.03	0.521	PTM (Phosphorylation)
ccr3_human	85	2.55x55	TM2	V => I	missense	0.0005931	72	121392	1	0.13	0.003	PTM (Phosphorylation)
ccr3_human	86	2.56x56	TM2	T => I	missense	8.238e-06	1	121396	0	0.0	0.993	PTM (Proteolytic Cleavage)
ccr3_human	86	2.56x56	TM2	T => S	missense	2.471e-05	3	121396	0	0.51	0.858	PTM (Proteolytic Cleavage)
ccr3_human	88	2.58x58	TM2	P => Q	missense	8.238e-06	1	121394	0	0.0	0.997
ccr3_human	92	2.62x62	TM2	H => R	missense	8.238e-06	1	121394	0	0.0	0.821	PTM (Proteolytic Cleavage)
ccr3_human	102	3.21x21	TM3	G => D	missense	1.648e-05	2	121394	0	0.01	0.41
ccr3_human	105	3.24x24	TM3	M => I	missense	8.238e-06	1	121396	0	0.03	0.461	PTM (Phosphorylation)
ccr3_human	106	3.25x25	TM3	C => R	missense	8.238e-06	1	121396	0	0.0	1.0
ccr3_human	110	3.29x29	TM3	S => L	missense	8.238e-06	1	121392	0	0.0	0.562	PTM (Disulfide bond)
ccr3_human	119	3.38x38	TM3	S => R	missense	8.238e-06	1	121384	0	0.0	0.995	PTM (Phosphorylation)
ccr3_human	128	3.47x47	TM3	T => K	missense	8.239e-06	1	121372	0	0.0	1.0	PTM (Phosphorylation)
ccr3_human	130	3.49x49	TM3	D => N	missense	2.472e-05	3	121378	0	0.0	1.0	PTM (Phosphorylation)
ccr3_human	136	3.55x55	TM3	V => A	missense	8.239e-06	1	121372	0	0.0	1.0	PTM (Phosphorylation) GP (contact)
ccr3_human	138	34.50x50	ICL2	A => T	missense	2.472e-05	3	121372	0	0.01	0.828	PTM (Phosphorylation) GP (contact)
ccr3_human	139	34.51x51	ICL2	V => M	missense	0.000585	71	121370	0	0.0	0.925	PTM (Phosphorylation) GP (contact)
ccr3_human	139	34.51x51	ICL2	V => L	missense	8.239e-06	1	121370	0	0.0	0.828	PTM (Phosphorylation) GP (contact)
ccr3_human	143	34.55x55	ICL2	R => Q	missense	4.12e-05	5	121354	0	0.06	0.376	PTM (Phosphorylation) GP (contact)
ccr3_human	144	34.56x56	ICL2	A => V	missense	1.648e-05	2	121354	0	0.12	0.027	PTM (Acetylation) GP (contact)
ccr3_human	145	34.57x57	ICL2	R => W	missense	5.769e-05	7	121340	0	0.0	0.933	PTM (Phosphorylation) GP (contact)
ccr3_human	147	4.39x39	TM4	V => A	missense	0.000239	29	121346	0	0.06	0.902	PTM (Phosphorylation)
ccr3_human	148	4.40x40	TM4	T => I	missense	0.0002307	28	121344	0	0.02	0.461	PTM (Phosphorylation)
ccr3_human	153	4.45x45	TM4	T => I	missense	8.242e-06	1	121332	0	0.02	0.934	PTM (Phosphorylation)
ccr3_human	156	4.48x48	TM4	V => I	missense	1.649e-05	2	121320	0	0.53	0.024	PTM (Phosphorylation)
ccr3_human	159	4.51x51	TM4	G => D	missense	4.122e-05	5	121302	0	0.04	0.752	PTM (Phosphorylation)
ccr3_human	159	4.51x51	TM4	G => V	missense	8.244e-06	1	121302	0	1.0	0.009	PTM (Phosphorylation)
ccr3_human	162	4.54x54	TM4	V => G	missense	8.245e-06	1	121284	0	0.32	0.006	PTM (Phosphorylation)
ccr3_human	165	4.57x57	TM4	A => P	missense	8.249e-06	1	121232	0	0.0	0.975	PTM (Phosphorylation)
ccr3_human	172	4.64x65	TM4	Y => H	missense	8.258e-06	1	121102	0	0.79	0.001
ccr3_human	181		ECL2	T => I	missense	8.267e-06	1	120964	0	0.24	0.014
ccr3_human	185	45.52x52	ECL2	A => V	missense	4.135e-05	5	120916	0	0.27	0.014
ccr3_human	187		ECL2	Y => H	missense	8.271e-06	1	120904	0	0.0	0.992	PTM (Phosphorylation)
ccr3_human	188		ECL2	P => L	missense	2.482e-05	3	120886	0	0.03	0.999	PTM (Phosphorylation)
ccr3_human	189		ECL2	E => G	missense	8.272e-06	1	120894	0	0.45	0.005
ccr3_human	189		ECL2	E => D	missense	8.272e-06	1	120896	0	0.35	0.005
ccr3_human	190		ECL2	D => G	missense	8.272e-05	10	120894	0	0.48	0.02
ccr3_human	190		ECL2	D => V	missense	8.272e-06	1	120894	0	0.06	0.405
ccr3_human	196	5.35x36	TM5	R => K	missense	8.269e-06	1	120938	0	1.0	0.004	PTM (Phosphorylation)
ccr3_human	199	5.38x39	TM5	H => Q	missense	5.786e-05	7	120972	0	1.0	0.024	PTM (Phosphorylation)
ccr3_human	200	5.39x40	TM5	T => S	missense	8.266e-06	1	120982	0	0.26	0.103	PTM (Phosphorylation)
ccr3_human	202	5.41x42	TM5	R => S	missense	8.264e-06	1	121010	0	0.04	0.056	PTM (Phosphorylation)
ccr3_human	208	5.47x47	TM5	L => R	missense	0.0001239	15	121108	0	0.0	0.998	PTM (Phosphorylation)
ccr3_human	209	5.48x48	TM5	V => I	missense	4.128e-05	5	121116	0	0.48	0.006	PTM (Phosphorylation)
ccr3_human	209	5.48x48	TM5	V => F	missense	4.128e-05	5	121116	1	0.07	0.753	PTM (Phosphorylation)
ccr3_human	211	5.50x50	TM5	P => R	missense	1.651e-05	2	121136	0	0.0	1.0	PTM (Phosphorylation)
ccr3_human	212	5.51x51	TM5	L => V	missense	8.255e-06	1	121142	0	0.01	0.767	PTM (Phosphorylation)
ccr3_human	213	5.52x52	TM5	L => F	missense	2.476e-05	3	121146	0	0.05	0.97	PTM (Phosphorylation)
ccr3_human	214	5.53x53	TM5	V => I	missense	8.253e-06	1	121168	0	0.55	0.114	PTM (Phosphorylation)
ccr3_human	215	5.54x54	TM5	M => L	missense	2.476e-05	3	121176	0	0.02	0.364	SodiumPocket MicroSwitch PTM (Phosphorylation)
ccr3_human	221	5.60x60	TM5	G => R	missense	8.249e-06	1	121234	0	0.21	0.723	PTM (Phosphorylation)
ccr3_human	222	5.61x61	TM5	I => V	missense	0.0009898	120	121232	1	0.0	0.999	PTM (Phosphorylation) GP (contact)
ccr3_human	225	5.64x64	TM5	T => M	missense	8.249e-06	1	121234	0	0.01	0.325	PTM (Phosphorylation) GP (contact)
ccr3_human	228	5.67x67	TM5	R => G	missense	2.474e-05	3	121242	0	0.01	0.551	PTM (Phosphorylation) GP (contact)
ccr3_human	230		ICL3	P => S	missense	8.248e-06	1	121238	0	0.05	0.812	PTM (Ubiquitylation)
ccr3_human	230		ICL3	P => R	missense	8.249e-06	1	121234	0	1.0	0.443	PTM (Ubiquitylation)
ccr3_human	231		ICL3	S => N	missense	8.248e-06	1	121238	0	1.0	0.028	PTM (Acetylation)
ccr3_human	234	6.30x30	TM6	K => R	missense	8.246e-06	1	121270	0	0.19	0.951	PTM (Phosphorylation)
ccr3_human	239	6.35x35	TM6	R => W	missense	4.123e-05	5	121274	0	0.0	0.988	PTM (Phosphorylation)
ccr3_human	239	6.35x35	TM6	R => Q	missense	0.0001484	18	121274	0	0.01	0.503	PTM (Phosphorylation)
ccr3_human	240	6.36x36	TM6	L => F	missense	8.245e-06	1	121284	0	0.0	0.999	PTM (Phosphorylation) GP (contact)
ccr3_human	243	6.39x39	TM6	V => A	missense	8.244e-06	1	121296	0	0.61	0.361	PTM (Phosphorylation)
ccr3_human	244	6.40x40	TM6	I => M	missense	8.246e-06	1	121278	0	0.0	0.995	PTM (Phosphorylation) GP (contact)
ccr3_human	246	6.42x42	TM6	A => V	missense	2.473e-05	3	121294	0	0.5	0.002	PTM (Phosphorylation)
ccr3_human	250	6.46x46	TM6	I => N	missense	8.242e-06	1	121328	0	0.0	0.776	PTM (Phosphorylation)
ccr3_human	252	6.48x48	TM6	W => G	missense	8.242e-06	1	121330	0	0.0	0.999	PTM (Phosphorylation)
ccr3_human	256	6.52x52	TM6	N => D	missense	1.648e-05	2	121342	0	0.0	0.708	PTM (Phosphorylation)
ccr3_human	256	6.52x52	TM6	N => S	missense	8.241e-06	1	121346	0	0.04	0.732	PTM (Phosphorylation)
ccr3_human	258	6.54x54	TM6	A => V	missense	8.241e-06	1	121346	0	1.0	0.013	PTM (Phosphorylation)
ccr3_human	259	6.55x55	TM6	I => V	missense	8.241e-06	1	121348	0	0.23	0.001	PTM (Phosphorylation)
ccr3_human	262	6.58x58	TM6	S => F	missense	8.241e-06	1	121348	0	0.08	0.098	PTM (Phosphorylation)
ccr3_human	266	6.62x62	TM6	S => F	missense	8.242e-06	1	121332	0	0.02	0.361	PTM (Phosphorylation)
ccr3_human	267	6.63x63	TM6	I => N	missense	8.242e-06	1	121334	0	0.31	0.003	PTM (Phosphorylation)
ccr3_human	269	6.65x65	TM6	F => Y	missense	8.242e-06	1	121330	0	0.71	0.962	PTM (Phosphorylation)
ccr3_human	271		ECL3	N => S	missense	8.242e-06	1	121334	0	0.46	0.009	PTM (Acetylation)
ccr3_human	275	7.27x26	TM7	R => W	missense	0.0001814	22	121298	0	0.11	0.901	PTM (Phosphorylation)
ccr3_human	275	7.27x26	TM7	R => Q	missense	0.01063	1290	121308	15	0.83	0.011	PTM (Phosphorylation)
ccr3_human	277	7.29x28	TM7	K => N	missense	5.77e-05	7	121316	0	0.39	0.314	PTM (Phosphorylation)
ccr3_human	277	7.29x28	TM7	K => N	missense	8.243e-06	1	121316	0	0.39	0.314	PTM (Phosphorylation)
ccr3_human	278	7.30x29	TM7	H => L	missense	8.243e-06	1	121318	0	0.01	0.21
ccr3_human	283	7.35x34	TM7	M => L	missense	8.242e-06	1	121324	0	0.73	0.001	PTM (Phosphorylation)
ccr3_human	288	7.40x39	TM7	V => L	missense	8.243e-06	1	121314	0	0.01	0.709	PTM (Phosphorylation)
ccr3_human	293	7.45x45	TM7	H => R	missense	8.243e-06	1	121316	0	0.0	1.0	PTM (Retinal protein)
ccr3_human	293	7.45x45	TM7	H => Q	missense	8.244e-06	1	121302	0	0.0	1.0	PTM (Retinal protein)
ccr3_human	298	7.50x50	TM7	P => L	missense	6.596e-05	8	121292	0	0.0	1.0	PTM (Phosphorylation)
ccr3_human	298	7.50x50	TM7	P => R	missense	8.245e-06	1	121292	0	0.0	1.0	PTM (Phosphorylation)
ccr3_human	302	7.54x54	TM7	A => T	missense	1.649e-05	2	121286	0	0.01	0.977	PTM (Phosphorylation)
ccr3_human	304	7.56x56	TM7	V => F	missense	4.947e-05	6	121278	0	0.0	0.92	PTM (Phosphorylation) GP (contact)
ccr3_human	304	7.56x56	TM7	V => A	missense	8.244e-06	1	121294	0	0.15	0.086	PTM (Phosphorylation) GP (contact)
ccr3_human	309	8.51x51	H8	R => W	missense	2.474e-05	3	121270	0	0.0	0.316	PTM (Phosphorylation) GP (contact)
ccr3_human	309	8.51x51	H8	R => Q	missense	0.0001897	23	121276	0	0.14	0.191	PTM (Phosphorylation) GP (contact)
ccr3_human	313	8.55x55	H8	R => S	missense	8.246e-06	1	121278	0	0.43	0.095	PTM (Phosphorylation)
ccr3_human	313	8.55x55	H8	R => H	missense	2.474e-05	3	121280	0	0.55	0.03	PTM (Phosphorylation)
ccr3_human	324		C-term	L => P	missense	6.599e-05	8	121222	0	0.02	0.159	PTM (Phosphorylation)
ccr3_human	325		C-term	G => D	missense	0.0005198	63	121206	0	0.03	0.028	PTM (Phosphorylation)
ccr3_human	327		C-term	Y => S	missense	8.252e-06	1	121190	0	0.25	0.085	PTM (Phosphorylation)
ccr3_human	328		C-term	I => M	missense	8.252e-06	1	121178	0	0.04	0.054	PTM (Phosphorylation)
ccr3_human	336		C-term	L => V	missense	1.654e-05	2	120936	0	0.33	0.139	PTM (Phosphorylation)
ccr3_human	342		C-term	V => A	missense	8.306e-06	1	120400	0	0.21	0.049	PTM (Phosphorylation)
ccr3_human	343		C-term	S => F	missense	6.655e-05	8	120214	0	0.0	0.992	PTM (Phosphorylation)
ccr3_human	343		C-term	S => C	missense	8.318e-06	1	120214	0	0.0	0.992	PTM (Phosphorylation)
ccr3_human	345		C-term	S => P	missense	1.67e-05	2	119776	0	0.01	0.779	PTM (Phosphorylation)
ccr3_human	345		C-term	S => T	missense	8.349e-06	1	119776	0	0.0	0.994	PTM (Phosphorylation)
ccr3_human	349		C-term	P => L	missense	0.000382	45	117816	0	0.04	0.008	PTM (Phosphorylation)
ccr3_human	349		C-term	P => R	missense	1.698e-05	2	117816	0	0.09	0.229	PTM (Phosphorylation)
ccr3_human	351		C-term	L => P	missense	0.001036	121	116742	1	0.03	0.986	PTM (Phosphorylation)
ccr3_human	353		C-term	I => M	missense	8.683e-06	1	115164	0	0.11	0.037	PTM (Phosphorylation)
ccr3_human	354		C-term	V => L	missense	8.729e-06	1	114562	0	0.22	0.688	SodiumPocket MicroSwitch PTM (Phosphorylation)
ccr3_human	38	1.36x36	TM1	P => Ter	stop gained	8.267e-06	1	120970	0	None	None	PTM (Proteolytic Cleavage)
ccr3_human	87	2.57x57	TM2	L => Ter	stop gained	7.417e-05	9	121340	0	None	None
ccr3_human	134	3.53x53	TM3	A => Ter	stop gained	1.648e-05	2	121396	0	None	None	SodiumPocket MicroSwitch PTM (Methylation) GP (contact)
ccr3_human	164	4.56x56	TM4	A => Ter	stop gained	8.24e-06	1	121356	0	None	None
ccr3_human	194	5.33x34	TM5	S => LysfsTer27	frameshift	1.651e-05	2	121108	0	None	None	PTM (Phosphorylation)
ccr3_human	328		C-term	I => SerfsTer87	frameshift	8.245e-06	1	121284	0	None	None	PTM (Phosphorylation)
ccr4_human	3		N-term	P => S	missense	8.876e-06	1	112666	0	0.27	0.001	PTM (Phosphorylation)
ccr4_human	4		N-term	T => M	missense	8.797e-06	1	113670	0	0.0	0.609	PTM (Phosphorylation)
ccr4_human	5		N-term	D => G	missense	8.709e-06	1	114824	0	0.23	0.0	PTM (N-linked Glycosylation)
ccr4_human	6		N-term	I => T	missense	1.732e-05	2	115490	0	0.43	0.0	PTM (Phosphorylation)
ccr4_human	15		N-term	I => V	missense	9.947e-05	12	120644	0	0.52	0.0	PTM (Phosphorylation)
ccr4_human	20		N-term	Y => H	missense	8.25e-06	1	121210	0	0.06	0.83	PTM (Phosphorylation)
ccr4_human	21		N-term	L => Q	missense	8.246e-05	10	121270	0	0.31	0.005	PTM (Sulfation)
ccr4_human	23		N-term	E => K	missense	2.473e-05	3	121334	0	0.28	0.05
ccr4_human	24		N-term	S => G	missense	8.241e-06	1	121348	0	0.6	0.001
ccr4_human	25		N-term	I => F	missense	8.24e-06	1	121360	0	0.78	0.001	PTM (Phosphorylation)
ccr4_human	26		N-term	P => R	missense	8.239e-06	1	121370	0	0.05	0.779	PTM (Sulfation)
ccr4_human	35	1.28x28	TM1	K => Q	missense	2.471e-05	3	121404	0	0.08	0.543	PTM (N-linked Glycosylation)
ccr4_human	35	1.28x28	TM1	K => E	missense	8.237e-06	1	121404	0	0.01	0.341	PTM (N-linked Glycosylation)
ccr4_human	40	1.33x33	TM1	L => H	missense	8.237e-06	1	121408	0	0.48	0.004
ccr4_human	44	1.37x37	TM1	P => S	missense	3.295e-05	4	121412	0	0.01	0.421
ccr4_human	45	1.38x38	TM1	L => P	missense	8.236e-06	1	121412	0	0.0	0.959	PTM (Proteolytic Cleavage)
ccr4_human	49	1.42x42	TM1	V => A	missense	8.236e-06	1	121412	0	0.0	0.996	PTM (Phosphorylation)
ccr4_human	55	1.48x48	TM1	L => V	missense	8.237e-06	1	121410	0	1.0	0.002	PTM (Proteolytic Cleavage)
ccr4_human	57	1.50x50	TM1	N => S	missense	8.236e-06	1	121412	0	0.0	0.999	PTM (Phosphorylation)
ccr4_human	61	1.54x54	TM1	V => G	missense	8.237e-06	1	121410	0	0.0	0.987	PTM (Acetylation)
ccr4_human	69	12.49x49	ICL1	R => W	missense	8.237e-06	1	121408	0	0.0	1.0	PTM (Proteolytic Cleavage)
ccr4_human	69	12.49x49	ICL1	R => Q	missense	8.237e-06	1	121406	0	0.0	1.0	PTM (Proteolytic Cleavage)
ccr4_human	73	2.38x38	TM2	M => V	missense	8.236e-06	1	121412	0	0.02	0.996	PTM (Phosphorylation)
ccr4_human	79	2.44x44	TM2	L => F	missense	8.237e-06	1	121410	0	0.13	0.452
ccr4_human	83	2.48x48	TM2	I => V	missense	1.647e-05	2	121408	0	0.14	0.036	PTM (Phosphorylation)
ccr4_human	88	2.53x53	TM2	F => C	missense	8.237e-06	1	121408	0	0.0	1.0
ccr4_human	90	2.55x55	TM2	F => V	missense	8.237e-06	1	121406	0	0.11	0.034	PTM (Disulfide bond)
ccr4_human	98	2.63x63	TM2	Y => C	missense	1.647e-05	2	121404	0	0.0	0.994	PTM (Disulfide bond)
ccr4_human	100	2.65x65	TM2	A => G	missense	0.000313	38	121406	0	0.13	0.612
ccr4_human	104	23.51x51	ECL1	V => L	missense	8.237e-06	1	121408	0	0.06	0.036	PTM (Phosphorylation)
ccr4_human	106	3.21x21	TM3	G => E	missense	8.236e-06	1	121412	0	0.02	1.0
ccr4_human	111	3.26x26	TM3	K => R	missense	8.236e-06	1	121412	0	0.08	1.0
ccr4_human	112	3.27x27	TM3	M => I	missense	1.647e-05	2	121412	0	0.8	0.0	PTM (Phosphorylation)
ccr4_human	113	3.28x28	TM3	I => L	missense	8.236e-06	1	121412	0	1.0	0.022	PTM (Phosphorylation)
ccr4_human	119	3.34x34	TM3	V => L	missense	8.236e-06	1	121412	0	0.63	0.094	PTM (Phosphorylation)
ccr4_human	139	3.54x54	TM3	I => V	missense	8.237e-06	1	121408	0	0.08	0.309	PTM (Phosphorylation) GP (contact)
ccr4_human	140	3.55x55	TM3	V => L	missense	8.237e-06	1	121406	0	0.0	0.999	PTM (Phosphorylation) GP (contact)
ccr4_human	141	3.56x56	TM3	H => Q	missense	8.237e-06	1	121406	0	0.04	0.978	PTM (Phosphorylation) GP (contact)
ccr4_human	142	34.50x50	ICL2	A => T	missense	8.237e-06	1	121408	0	0.0	0.757	PTM (Phosphorylation) GP (contact)
ccr4_human	142	34.50x50	ICL2	A => V	missense	8.237e-06	1	121406	0	0.06	0.063	PTM (Phosphorylation) GP (contact)
ccr4_human	147	34.55x55	ICL2	R => W	missense	8.237e-06	1	121404	0	0.0	0.952	PTM (Phosphorylation) GP (contact)
ccr4_human	152	4.40x40	TM4	T => S	missense	8.237e-06	1	121398	0	0.09	0.04	PTM (Phosphorylation)
ccr4_human	154	4.42x42	TM4	G => A	missense	9.061e-05	11	121400	1	0.03	0.369	PTM (Phosphorylation)
ccr4_human	159	4.47x47	TM4	L => F	missense	1.648e-05	2	121392	0	0.1	0.076	PTM (Phosphorylation)
ccr4_human	168	4.56x56	TM4	A => S	missense	8.237e-06	1	121402	0	0.0	0.911	PTM (Phosphorylation)
ccr4_human	176	4.64x65	TM4	S => G	missense	7.413e-05	9	121408	0	0.31	0.654
ccr4_human	177		ECL2	T => I	missense	1.647e-05	2	121408	0	0.01	0.782	PTM (Phosphorylation)
ccr4_human	178		ECL2	C => S	missense	4.942e-05	6	121410	0	1.0	0.008	PTM (Phosphorylation)
ccr4_human	182		ECL2	R => C	missense	8.236e-06	1	121412	0	0.16	0.606	PTM (Phosphorylation)
ccr4_human	182		ECL2	R => H	missense	4.118e-05	5	121408	0	0.47	0.001	PTM (Phosphorylation)
ccr4_human	183		ECL2	N => S	missense	2.471e-05	3	121410	0	0.77	0.755	PTM (N-linked Glycosylation)
ccr4_human	184		ECL2	H => Y	missense	8.237e-06	1	121406	0	0.46	0.003	PTM (Phosphorylation)
ccr4_human	184		ECL2	H => R	missense	8.236e-06	1	121412	0	0.76	0.006	PTM (Phosphorylation)
ccr4_human	192		ECL2	S => C	missense	8.236e-06	1	121412	0	0.0	0.726
ccr4_human	196	5.32x33	TM5	T => M	missense	8.237e-06	1	121408	0	0.12	0.94	PTM (Phosphorylation)
ccr4_human	197	5.33x34	TM5	T => M	missense	1.647e-05	2	121406	0	0.14	0.081
ccr4_human	199	5.35x36	TM5	K => N	missense	8.237e-06	1	121406	0	0.04	0.799	PTM (Phosphorylation)
ccr4_human	200	5.36x37	TM5	V => I	missense	8.237e-06	1	121408	0	0.4	0.129	PTM (Phosphorylation)
ccr4_human	200	5.36x37	TM5	V => F	missense	8.237e-06	1	121408	0	0.69	0.176	PTM (Phosphorylation)
ccr4_human	207	5.43x44	TM5	N => D	missense	8.237e-06	1	121406	0	0.0	1.0	SodiumPocket MicroSwitch
ccr4_human	208	5.44x45	TM5	I => M	missense	2.471e-05	3	121404	0	0.01	0.661	PTM (Phosphorylation)
ccr4_human	210	5.46x461	TM5	G => R	missense	8.237e-06	1	121400	0	0.0	1.0
ccr4_human	215	5.51x51	TM5	L => F	missense	1.647e-05	2	121400	0	0.06	0.133	SodiumPocket MicroSwitch PTM (Phosphorylation)
ccr4_human	224	5.60x60	TM5	M => V	missense	8.237e-06	1	121404	0	0.04	0.079	PTM (Methylation)
ccr4_human	224	5.60x60	TM5	M => I	missense	8.237e-06	1	121404	0	0.02	0.079	PTM (Methylation)
ccr4_human	229	5.65x65	TM5	L => S	missense	8.238e-06	1	121394	0	0.0	1.0	PTM (Phosphorylation) GP (contact)
ccr4_human	230	5.66x66	TM5	Q => K	missense	8.237e-06	1	121398	0	0.06	0.004	PTM (Ubiquitylation) GP (contact)
ccr4_human	237	6.30x30	TM6	K => N	missense	2.472e-05	3	121380	0	0.0	0.825	PTM (Phosphorylation)
ccr4_human	240	6.33x33	TM6	A => V	missense	1.648e-05	2	121370	0	0.05	1.0	PTM (Phosphorylation) GP (contact)
ccr4_human	247	6.40x40	TM6	V => M	missense	8.24e-06	1	121356	0	0.0	1.0	PTM (Phosphorylation) GP (contact)
ccr4_human	248	6.41x41	TM6	V => M	missense	8.24e-06	1	121358	0	1.0	0.134	PTM (Phosphorylation)
ccr4_human	249	6.42x42	TM6	V => I	missense	1.648e-05	2	121356	0	1.0	0.004	PTM (Phosphorylation)
ccr4_human	252	6.45x45	TM6	L => F	missense	8.241e-06	1	121348	0	1.0	0.137	PTM (Phosphorylation)
ccr4_human	256	6.49x49	TM6	T => A	missense	8.242e-06	1	121330	0	0.36	0.036	PTM (Phosphorylation)
ccr4_human	258	6.51x51	TM6	Y => H	missense	8.242e-06	1	121334	0	0.05	1.0	PTM (Phosphorylation)
ccr4_human	260	6.53x53	TM6	I => V	missense	1.648e-05	2	121324	0	0.25	0.005	PTM (Phosphorylation)
ccr4_human	260	6.53x53	TM6	I => T	missense	8.243e-06	1	121318	0	0.0	0.287	PTM (Phosphorylation)
ccr4_human	266	6.59x59	TM6	T => S	missense	8.244e-06	1	121306	0	0.42	0.006	PTM (Phosphorylation)
ccr4_human	277	7.26x25	TM7	T => I	missense	8.246e-06	1	121276	0	0.04	0.15	PTM (Phosphorylation)
ccr4_human	281	7.30x29	TM7	Y => H	missense	2.474e-05	3	121282	0	0.29	0.001	PTM (Phosphorylation)
ccr4_human	284	7.33x32	TM7	Y => F	missense	8.246e-06	1	121268	0	0.26	0.02
ccr4_human	311	8.50x50	H8	F => S	missense	8.268e-06	1	120944	0	0.0	0.999	PTM (Phosphorylation)
ccr4_human	312	8.51x51	H8	R => H	missense	1.654e-05	2	120922	0	0.0	0.935	PTM (Retinal protein) GP (contact)
ccr4_human	315	8.54x54	H8	I => L	missense	8.282e-06	1	120746	0	1.0	0.001	PTM (Phosphorylation)
ccr4_human	315	8.54x54	H8	I => V	missense	8.282e-06	1	120746	0	0.06	0.004	PTM (Phosphorylation)
ccr4_human	315	8.54x54	H8	I => F	missense	8.282e-06	1	120746	0	0.0	0.145	PTM (Phosphorylation)
ccr4_human	315	8.54x54	H8	I => T	missense	8.286e-06	1	120688	0	0.02	0.094	PTM (Phosphorylation)
ccr4_human	324		C-term	G => S	missense	0.0008153	97	118972	0	0.28	0.103	PTM (Phosphorylation)
ccr4_human	324		C-term	G => R	missense	8.405e-06	1	118972	0	0.24	0.004	PTM (Phosphorylation)
ccr4_human	327		C-term	V => M	missense	2.538e-05	3	118196	0	0.22	0.002	PTM (Phosphorylation)
ccr4_human	327		C-term	V => G	missense	1.693e-05	2	118124	0	0.33	0.001	PTM (Phosphorylation)
ccr4_human	329		C-term	C => G	missense	5.953e-05	7	117582	0	0.11	0.698	PTM (Phosphorylation)
ccr4_human	329		C-term	C => F	missense	8.51e-06	1	117502	0	0.04	0.037	PTM (Phosphorylation)
ccr4_human	334		C-term	L => V	missense	2.582e-05	3	116182	0	0.79	0.002	PTM (Phosphorylation)
ccr4_human	337		C-term	I => F	missense	8.651e-06	1	115590	0	0.47	0.001	PTM (Phosphorylation)
ccr4_human	337		C-term	I => T	missense	8.664e-06	1	115414	0	0.74	0.0	PTM (Phosphorylation)
ccr4_human	342		C-term	T => S	missense	8.879e-06	1	112626	0	0.22	0.003	PTM (Phosphorylation)
ccr4_human	342		C-term	T => N	missense	8.887e-06	1	112520	0	0.02	0.002	PTM (Phosphorylation)
ccr4_human	345		C-term	S => P	missense	2.681e-05	3	111916	0	0.0	0.945	PTM (Phosphorylation)
ccr4_human	345		C-term	S => L	missense	8.949e-06	1	111748	0	0.0	0.637	PTM (Phosphorylation)
ccr4_human	352		C-term	M => V	missense	9.057e-06	1	110412	0	0.11	0.0	PTM (Phosphorylation)
ccr4_human	352		C-term	M => L	missense	9.057e-06	1	110412	0	0.03	0.002	PTM (Phosphorylation)
ccr4_human	357		C-term	H => R	missense	9.111e-06	1	109754	0	0.05	0.001	PTM (Phosphorylation)
ccr4_human	45	1.38x38	TM1	L => HisfsTer30	frameshift	8.237e-06	1	121408	0	None	None	PTM (Proteolytic Cleavage)
ccr4_human	126	3.41x41	TM3	F => SerfsTer6	frameshift	8.236e-06	1	121412	0	None	None	PTM (Phosphorylation)
ccr4_human	234		ICL3	N => LysfsTer2	frameshift	8.238e-06	1	121394	0	None	None	PTM (Phosphorylation)
ccr4_human	321		C-term	T => ProfsTer46	frameshift	8.339e-06	1	119912	0	None	None	PTM (Phosphorylation)
ccr5_human	5		N-term	V => M	missense	8.958e-06	1	111632	0	0.16	0.004	PTM (N-linked Glycosylation)
ccr5_human	5		N-term	V => G	missense	8.956e-06	1	111652	0	0.36	0.001	PTM (N-linked Glycosylation)
ccr5_human	11		N-term	D => G	missense	1.763e-05	2	113430	0	0.05	0.013	PTM (N-linked Glycosylation)
ccr5_human	12		N-term	I => V	missense	8.79e-06	1	113760	0	0.13	0.002	PTM (Phosphorylation)
ccr5_human	12		N-term	I => T	missense	8.783e-06	1	113860	0	0.18	0.004	PTM (Phosphorylation)
ccr5_human	13		N-term	N => D	missense	8.759e-06	1	114168	0	1.0	0.0	PTM (Phosphorylation)
ccr5_human	15		N-term	Y => H	missense	6.09e-05	7	114950	0	0.5	0.0	PTM (Phosphorylation)
ccr5_human	15		N-term	Y => C	missense	8.69e-06	1	115076	0	0.16	0.037	PTM (Phosphorylation)
ccr5_human	17		N-term	S => L	missense	3.447e-05	4	116046	0	0.17	0.014	PTM (Phosphorylation)
ccr5_human	17		N-term	S => W	missense	2.585e-05	3	116046	0	0.05	0.858	PTM (Phosphorylation)
ccr5_human	18		N-term	E => K	missense	6.848e-05	8	116818	0	0.56	0.104	PTM (Phosphorylation)
ccr5_human	20		N-term	C => S	missense	0.0004234	50	118092	0	0.01	0.994	PTM (Phosphorylation)
ccr5_human	22	1.24x24	TM1	K => T	missense	1.678e-05	2	119202	0	0.03	0.613	PTM (Sulfation)
ccr5_human	25	1.27x27	TM1	V => E	missense	1.666e-05	2	120016	0	0.13	0.103	PTM (Phosphorylation)
ccr5_human	26	1.28x28	TM1	K => R	missense	0.0001164	14	120262	0	0.58	0.003	PTM (Sulfation)
ccr5_human	29	1.31x31	TM1	A => T	missense	8.268e-06	1	120952	0	0.05	0.167	PTM (Phosphorylation)
ccr5_human	29	1.31x31	TM1	A => S	missense	2.48e-05	3	120952	0	0.09	0.023	PTM (Phosphorylation)
ccr5_human	31	1.33x33	TM1	R => H	missense	0.0001072	13	121246	0	0.6	0.001	PTM (Phosphorylation)
ccr5_human	32	1.34x34	TM1	L => F	missense	8.244e-06	1	121296	0	1.0	0.016	PTM (Phosphorylation)
ccr5_human	35	1.37x37	TM1	P => S	missense	8.241e-06	1	121350	0	0.02	0.178	PTM (N-linked Glycosylation)
ccr5_human	35	1.37x37	TM1	P => L	missense	1.648e-05	2	121346	0	0.07	0.117	PTM (N-linked Glycosylation)
ccr5_human	39	1.41x41	TM1	L => P	missense	1.648e-05	2	121390	0	0.0	0.946	PTM (Phosphorylation)
ccr5_human	46	1.48x48	TM1	V => M	missense	0.0002142	26	121400	0	0.07	0.482	PTM (O-GalNAc)
ccr5_human	48	1.50x50	TM1	N => S	missense	4.942e-05	6	121404	0	0.0	0.996	PTM (Phosphorylation)
ccr5_human	49	1.51x51	TM1	M => K	missense	8.237e-06	1	121406	0	0.03	0.148	PTM (Phosphorylation)
ccr5_human	49	1.51x51	TM1	M => I	missense	8.237e-06	1	121400	0	1.0	0.002	PTM (Phosphorylation)
ccr5_human	54	1.56x56	TM1	I => T	missense	8.237e-06	1	121408	0	0.13	0.077	PTM (Phosphorylation)
ccr5_human	55	1.57x57	TM1	L => Q	missense	0.01273	1545	121408	11	0.0	1.0	PTM (Proteolytic Cleavage)
ccr5_human	55	1.57x57	TM1	L => R	missense	8.237e-06	1	121408	0	0.0	1.0	PTM (Proteolytic Cleavage)
ccr5_human	60	12.49x49	ICL1	R => S	missense	0.0007249	88	121400	0	0.02	0.297	PTM (Phosphorylation)
ccr5_human	63	2.37x37	TM2	S => C	missense	0.0008484	103	121404	1	0.01	0.275	PTM (Phosphorylation)
ccr5_human	64	2.38x38	TM2	M => I	missense	0.0001153	14	121398	0	0.01	0.694	PTM (Proteolytic Cleavage)
ccr5_human	68	2.42x42	TM2	Y => H	missense	3.295e-05	4	121408	0	0.0	0.996	PTM (Phosphorylation)
ccr5_human	68	2.42x42	TM2	Y => N	missense	8.237e-06	1	121408	0	0.0	0.996	PTM (Phosphorylation)
ccr5_human	68	2.42x42	TM2	Y => S	missense	2.471e-05	3	121400	0	0.0	0.995	PTM (Phosphorylation)
ccr5_human	69	2.43x43	TM2	L => V	missense	4.118e-05	5	121404	0	0.01	0.998	PTM (Proteolytic Cleavage)
ccr5_human	69	2.43x43	TM2	L => P	missense	8.237e-06	1	121404	0	0.0	1.0	PTM (Proteolytic Cleavage)
ccr5_human	71	2.45x45	TM2	N => S	missense	3.295e-05	4	121404	0	0.01	0.973	PTM (Methylation)
ccr5_human	72	2.46x46	TM2	L => P	missense	8.237e-06	1	121404	0	0.0	1.0	PTM (Proteolytic Cleavage)
ccr5_human	73	2.47x47	TM2	A => V	missense	0.0007578	92	121402	1	0.0	0.806	PTM (Phosphorylation)
ccr5_human	73	2.47x47	TM2	A => D	missense	8.237e-06	1	121402	0	0.0	0.977	PTM (Phosphorylation)
ccr5_human	84	2.58x58	TM2	P => S	missense	8.237e-06	1	121398	0	0.0	1.0	PTM (Phosphorylation)
ccr5_human	87	2.61x61	TM2	A => P	missense	8.238e-06	1	121392	0	0.02	0.992
ccr5_human	87	2.61x61	TM2	A => D	missense	8.238e-06	1	121390	0	0.01	0.989
ccr5_human	92	2.66x66	TM2	A => T	missense	8.238e-06	1	121394	0	0.17	0.003	PTM (Proteolytic Cleavage)
ccr5_human	93	23.49x49	ECL1	Q => E	missense	1.647e-05	2	121400	0	0.61	0.004
ccr5_human	94	23.50x50	ECL1	W => G	missense	8.237e-06	1	121404	0	0.0	1.0
ccr5_human	94	23.50x50	ECL1	W => R	missense	8.237e-06	1	121404	0	0.0	1.0
ccr5_human	95	23.51x51	ECL1	D => N	missense	8.237e-06	1	121404	0	0.02	0.009
ccr5_human	96	23.52x52	ECL1	F => L	missense	8.237e-06	1	121406	0	0.07	0.181	PTM (Phosphorylation)
ccr5_human	101	3.25x25	TM3	C => Y	missense	8.237e-06	1	121408	0	0.0	1.0	PTM (Phosphorylation)
ccr5_human	106	3.30x30	TM3	G => R	missense	0.0004283	52	121406	0	0.01	0.947
ccr5_human	107	3.31x31	TM3	L => F	missense	0.0002059	25	121406	0	0.37	0.077	PTM (Phosphorylation)
ccr5_human	108	3.32x32	TM3	Y => H	missense	8.237e-06	1	121404	0	0.03	0.998	PTM (Acetylation)
ccr5_human	108	3.32x32	TM3	Y => C	missense	1.647e-05	2	121404	0	0.04	0.999	PTM (Acetylation)
ccr5_human	109	3.33x33	TM3	F => L	missense	8.237e-06	1	121400	0	0.63	0.002
ccr5_human	110	3.34x34	TM3	I => L	missense	4.942e-05	6	121404	0	0.58	0.02	PTM (Disulfide bond)
ccr5_human	110	3.34x34	TM3	I => T	missense	1.647e-05	2	121400	0	0.39	0.02	PTM (Disulfide bond)
ccr5_human	111	3.35x35	TM3	G => S	missense	8.237e-06	1	121398	0	0.01	0.687
ccr5_human	113	3.37x37	TM3	F => L	missense	8.237e-06	1	121398	0	0.01	0.098	PTM (Phosphorylation)
ccr5_human	115	3.39x39	TM3	G => R	missense	8.237e-06	1	121404	0	0.01	0.99
ccr5_human	118	3.42x42	TM3	F => L	missense	8.237e-06	1	121406	0	0.01	0.155	PTM (Phosphorylation)
ccr5_human	120	3.44x44	TM3	I => L	missense	8.237e-06	1	121406	0	0.04	0.119	PTM (Phosphorylation)
ccr5_human	120	3.44x44	TM3	I => V	missense	8.237e-06	1	121406	0	0.15	0.074	PTM (Phosphorylation)
ccr5_human	120	3.44x44	TM3	I => T	missense	1.647e-05	2	121404	0	0.34	0.513	PTM (Phosphorylation)
ccr5_human	121	3.45x45	TM3	L => R	missense	0.0001153	14	121404	0	0.0	0.995	PTM (Phosphorylation)
ccr5_human	123	3.47x47	TM3	T => K	missense	8.237e-06	1	121402	0	0.0	0.928
ccr5_human	124	3.48x48	TM3	I => V	missense	8.237e-06	1	121408	0	0.18	0.03	SodiumPocket MicroSwitch PTM (Phosphorylation)
ccr5_human	125	3.49x49	TM3	D => N	missense	1.647e-05	2	121404	0	0.0	0.945	PTM (Phosphorylation)
ccr5_human	125	3.49x49	TM3	D => E	missense	8.237e-06	1	121400	0	0.02	0.996	PTM (Phosphorylation)
ccr5_human	128	3.52x52	TM3	L => M	missense	8.237e-06	1	121404	0	0.01	1.0	PTM (Phosphorylation)
ccr5_human	131	3.55x55	TM3	V => I	missense	9.061e-05	11	121402	0	0.0	1.0	PTM (Phosphorylation) GP (contact)
ccr5_human	131	3.55x55	TM3	V => F	missense	0.0001812	22	121402	0	0.0	1.0	PTM (Phosphorylation) GP (contact)
ccr5_human	137	34.54x54	ICL2	L => F	missense	8.237e-06	1	121404	0	0.02	0.905	PTM (Phosphorylation) GP (contact)
ccr5_human	141	4.38x38	TM4	T => M	missense	3.295e-05	4	121392	0	0.0	0.992	PTM (Phosphorylation)
ccr5_human	143	4.40x40	TM4	T => N	missense	8.238e-06	1	121390	0	0.02	0.033	PTM (Phosphorylation)
ccr5_human	144	4.41x41	TM4	F => I	missense	8.238e-06	1	121394	0	0.04	0.597	PTM (Acetylation)
ccr5_human	153	4.50x50	TM4	W => G	missense	8.238e-06	1	121384	0	0.01	0.558	PTM (Phosphorylation)
ccr5_human	153	4.50x50	TM4	W => C	missense	4.119e-05	5	121386	0	0.0	0.816	PTM (Phosphorylation)
ccr5_human	159	4.56x56	TM4	A => V	missense	8.24e-05	10	121352	0	0.13	0.072	PTM (Phosphorylation)
ccr5_human	159	4.56x56	TM4	A => E	missense	1.648e-05	2	121352	0	0.0	0.931	PTM (Phosphorylation)
ccr5_human	164	4.61x62	TM4	I => T	missense	8.242e-06	1	121326	0	0.04	0.078
ccr5_human	164	4.61x62	TM4	I => M	missense	1.648e-05	2	121330	0	0.05	0.41
ccr5_human	165	4.62x63	TM4	I => T	missense	3.297e-05	4	121330	0	0.02	0.864	PTM (Phosphorylation)
ccr5_human	169		ECL2	S => Y	missense	8.243e-06	1	121312	0	0.35	0.515
ccr5_human	172		ECL2	E => A	missense	6.595e-05	8	121302	0	0.02	0.208
ccr5_human	177		ECL2	T => S	missense	8.246e-06	1	121272	0	0.24	0.021	PTM (Phosphorylation)
ccr5_human	178	45.50x50	ECL2	C => R	missense	4.123e-05	5	121258	0	0.0	0.998	PTM (Phosphorylation)
ccr5_human	179	45.51x51	ECL2	S => N	missense	8.247e-06	1	121252	0	0.18	0.128	PTM (Disulfide bond)
ccr5_human	180	45.52x52	ECL2	S => F	missense	8.248e-06	1	121242	0	0.14	0.003
ccr5_human	182		ECL2	F => L	missense	3.322e-05	4	120414	0	0.08	0.098	PTM (Phosphorylation)
ccr5_human	185		ECL2	S => R	missense	8.908e-06	1	112262	0	0.18	0.005
ccr5_human	187	5.31x32	TM5	Y => C	missense	9.051e-06	1	110482	0	0.17	0.84	PTM (Phosphorylation)
ccr5_human	189	5.33x34	TM5	F => L	missense	8.887e-06	1	112528	0	0.74	0.02
ccr5_human	189	5.33x34	TM5	F => I	missense	8.887e-06	1	112528	0	0.49	0.287
ccr5_human	190	5.34x35	TM5	W => R	missense	1.84e-05	2	108706	0	0.0	1.0
ccr5_human	190	5.34x35	TM5	W => G	missense	9.199e-06	1	108706	0	0.0	1.0
ccr5_human	190	5.34x35	TM5	W => C	missense	1.813e-05	2	110322	0	0.0	1.0
ccr5_human	193	5.37x38	TM5	F => L	missense	9.06e-06	1	110370	0	0.15	0.019	PTM (Phosphorylation)
ccr5_human	206	5.50x50	TM5	P => L	missense	8.248e-06	1	121246	0	0.0	1.0	PTM (Phosphorylation)
ccr5_human	209	5.53x53	TM5	V => I	missense	8.246e-06	1	121270	0	0.61	0.047	PTM (Phosphorylation)
ccr5_human	210	5.54x54	TM5	M => I	missense	8.245e-06	1	121280	0	0.02	0.936
ccr5_human	216	5.60x60	TM5	G => V	missense	4.947e-05	6	121292	0	0.04	0.493	PTM (Phosphorylation)
ccr5_human	220	5.64x64	TM5	T => I	missense	8.246e-06	1	121272	0	0.26	0.764	PTM (Phosphorylation) GP (contact)
ccr5_human	222	5.66x66	TM5	L => P	missense	8.245e-06	1	121284	0	0.01	0.972	PTM (Phosphorylation) GP (contact)
ccr5_human	223	5.67x67	TM5	R => W	missense	0.0001155	14	121250	0	0.0	0.967	PTM (Phosphorylation) GP (contact)
ccr5_human	223	5.67x67	TM5	R => Q	missense	0.00503	610	121274	15	0.1	0.074	PTM (Phosphorylation) GP (contact)
ccr5_human	225		ICL3	R => Q	missense	5.773e-05	7	121252	0	0.06	0.407	PTM (Phosphorylation)
ccr5_human	232	6.32x32	TM6	R => G	missense	8.244e-06	1	121302	0	0.0	0.673	PTM (Phosphorylation) GP (contact)
ccr5_human	236	6.36x36	TM6	L => I	missense	8.243e-06	1	121310	0	0.03	0.927	PTM (Phosphorylation) GP (contact)
ccr5_human	239	6.39x39	TM6	T => N	missense	8.242e-06	1	121328	0	0.0	0.629	PTM (Phosphorylation)
ccr5_human	240	6.40x40	TM6	I => N	missense	8.241e-06	1	121340	0	0.0	0.988	PTM (Phosphorylation) GP (contact)
ccr5_human	243	6.43x43	TM6	V => A	missense	8.24e-06	1	121364	0	0.04	0.113	PTM (Phosphorylation)
ccr5_human	246	6.46x46	TM6	L => I	missense	8.239e-06	1	121370	0	0.29	0.045	PTM (Phosphorylation)
ccr5_human	247	6.47x47	TM6	F => S	missense	2.472e-05	3	121370	0	0.02	0.997	PTM (Phosphorylation)
ccr5_human	248	6.48x48	TM6	W => C	missense	8.239e-06	1	121380	0	0.0	0.997	PTM (Phosphorylation)
ccr5_human	253	6.53x53	TM6	I => T	missense	1.648e-05	2	121386	0	0.0	0.939	PTM (Phosphorylation)
ccr5_human	253	6.53x53	TM6	I => M	missense	8.238e-06	1	121386	0	0.0	0.954	PTM (Phosphorylation)
ccr5_human	254	6.54x54	TM6	V => I	missense	8.238e-06	1	121386	0	0.06	0.169	PTM (Acetylation)
ccr5_human	258	6.58x58	TM6	N => S	missense	8.238e-06	1	121390	0	1.0	0.004	PTM (Phosphorylation)
ccr5_human	269	7.25x24	TM7	C => Y	missense	4.12e-05	5	121352	0	0.0	0.986	PTM (Phosphorylation)
ccr5_human	272	7.28x27	TM7	S => P	missense	6.594e-05	8	121322	0	0.0	0.864	PTM (Phosphorylation)
ccr5_human	272	7.28x27	TM7	S => C	missense	1.649e-05	2	121316	0	0.0	0.159	PTM (Phosphorylation)
ccr5_human	275	7.31x30	TM7	L => W	missense	8.244e-06	1	121300	0	0.0	0.999	PTM (Phosphorylation)
ccr5_human	277	7.33x32	TM7	Q => H	missense	1.649e-05	2	121270	0	0.11	0.811	PTM (Phosphorylation)
ccr5_human	280	7.36x35	TM7	Q => P	missense	2.475e-05	3	121232	0	0.0	0.982	PTM (Sumoylation)
ccr5_human	280	7.36x35	TM7	Q => R	missense	8.249e-06	1	121232	0	0.02	0.93	PTM (Sumoylation)
ccr5_human	281	7.37x36	TM7	V => A	missense	3.3e-05	4	121226	0	0.1	0.248	PTM (Phosphorylation)
ccr5_human	285	7.41x40	TM7	L => V	missense	8.251e-06	1	121194	0	0.1	0.859	PTM (Phosphorylation)
ccr5_human	287	7.43x42	TM7	M => K	missense	8.251e-06	1	121194	0	0.01	0.098	PTM (Phosphorylation)
ccr5_human	288	7.44x43	TM7	T => A	missense	0.000429	52	121198	0	0.09	0.081	PTM (Phosphorylation)
ccr5_human	288	7.44x43	TM7	T => M	missense	6.604e-05	8	121138	0	0.05	0.298	PTM (Phosphorylation)
ccr5_human	289	7.45x45	TM7	H => D	missense	2.476e-05	3	121172	0	0.0	1.0	PTM (Phosphorylation)
ccr5_human	292	7.48x48	TM7	I => V	missense	8.251e-06	1	121192	0	0.83	0.019	PTM (Phosphorylation)
ccr5_human	292	7.48x48	TM7	I => S	missense	8.252e-06	1	121190	0	0.0	0.817	PTM (Phosphorylation)
ccr5_human	293	7.49x49	TM7	N => K	missense	8.254e-06	1	121152	0	0.0	0.989	PTM (Retinal protein)
ccr5_human	298	7.54x54	TM7	A => D	missense	8.265e-06	1	120996	0	0.0	0.997	PTM (Phosphorylation)
ccr5_human	301	8.47x47	H8	G => R	missense	8.25e-06	1	121212	0	0.0	0.72	PTM (Phosphorylation) GP (contact)
ccr5_human	318		C-term	K => E	missense	3.305e-05	4	121034	0	0.28	0.066	PTM (Phosphorylation)
ccr5_human	319		C-term	R => C	missense	0.0001405	17	120982	0	0.2	0.001	PTM (Phosphorylation)
ccr5_human	319		C-term	R => H	missense	4.134e-05	5	120954	0	0.79	0.001	PTM (Phosphorylation)
ccr5_human	320		C-term	F => V	missense	8.27e-06	1	120918	0	0.02	0.067	PTM (Phosphorylation)
ccr5_human	328		C-term	Q => R	missense	8.392e-06	1	119156	0	0.34	0.003	PTM (Phosphorylation)
ccr5_human	328		C-term	Q => H	missense	1.681e-05	2	118986	0	0.54	0.002	PTM (Phosphorylation)
ccr5_human	331		C-term	A => P	missense	8.495e-06	1	117714	0	0.26	0.003	PTM (Phosphorylation)
ccr5_human	333		C-term	E => K	missense	1.713e-05	2	116782	0	0.01	0.013	PTM (Phosphorylation)
ccr5_human	333		C-term	E => A	missense	1.713e-05	2	116752	0	0.01	0.14	PTM (Phosphorylation)
ccr5_human	334		C-term	R => G	missense	1.719e-05	2	116362	0	0.03	0.136	PTM (Phosphorylation)
ccr5_human	334		C-term	R => Q	missense	2.578e-05	3	116386	0	0.03	0.135	PTM (Phosphorylation)
ccr5_human	335		C-term	A => V	missense	0.003535	410	115988	12	0.88	0.001	PTM (Phosphorylation)
ccr5_human	335		C-term	A => G	missense	1.724e-05	2	115988	0	0.22	0.005	PTM (Phosphorylation)
ccr5_human	336		C-term	S => I	missense	6.91e-05	8	115770	0	0.0	0.216	PTM (Phosphorylation)
ccr5_human	339		C-term	Y => F	missense	0.001194	137	114706	2	0.17	0.033	PTM (Phosphorylation)
ccr5_human	339		C-term	Y => C	missense	8.718e-06	1	114706	0	0.02	0.053	PTM (Phosphorylation)
ccr5_human	341		C-term	R => Q	missense	1.761e-05	2	113582	0	0.48	0.004	PTM (Phosphorylation)
ccr5_human	342		C-term	S => A	missense	8.81e-06	1	113512	0	0.02	0.763	PTM (Phosphorylation)
ccr5_human	344		C-term	G => E	missense	7.114e-05	8	112462	0	0.01	0.972	SodiumPocket MicroSwitch PTM (Phosphorylation)
ccr5_human	344		C-term	G => V	missense	7.114e-05	8	112462	0	0.11	0.931	SodiumPocket MicroSwitch PTM (Phosphorylation)
ccr5_human	344		C-term	G => A	missense	1.778e-05	2	112462	0	0.21	0.162	SodiumPocket MicroSwitch PTM (Phosphorylation)
ccr5_human	348		C-term	I => M	missense	1.8e-05	2	111100	0	0.01	0.432	PTM (Phosphorylation)
ccr5_human	17		N-term	S => Ter	stop gained	0.0001551	18	116046	0	None	None	PTM (Phosphorylation)
ccr5_human	20		N-term	C => Ter	stop gained	8.443e-06	1	118448	0	None	None	PTM (Phosphorylation)
ccr5_human	23	1.25x25	TM1	I => AsnfsTer44	frameshift	8.431e-06	1	118612	0	None	None
ccr5_human	22	1.24x24	TM1	K => Ter	stop gained	8.396e-06	1	119108	0	None	None	PTM (Sulfation)
ccr5_human	50	1.52x52	TM1	L => ArgfsTer6	frameshift	1.647e-05	2	121404	0	None	None	PTM (Phosphorylation)
ccr5_human	86	2.60x60	TM2	W => Ter	stop gained	8.237e-06	1	121400	0	None	None	PTM (Proteolytic Cleavage)
ccr5_human	101	3.25x25	TM3	C => Ter	stop gained	0.0005848	71	121408	0	None	None	PTM (Phosphorylation)
ccr5_human	104	3.28x28	TM3	L => AspfsTer22	frameshift	8.237e-06	1	121408	0	None	None	PTM (Phosphorylation)
ccr5_human	184		ECL2	Y => Ter	stop gained	9.319e-06	1	107308	0	None	None	PTM (Phosphorylation)
ccr5_human	186	5.30x31	TM5	Q => Ter	stop gained	8.979e-06	1	111374	0	None	None
ccr5_human	225		ICL3	R => Ter	stop gained	0.0001815	22	121242	1	None	None	PTM (Phosphorylation)
ccr5_human	261	6.61x61	TM6	Q => Ter	stop gained	1.648e-05	2	121386	0	None	None	PTM (Phosphorylation)
ccr5_human	295	7.51x51	TM7	I => SerfsTer15	frameshift	4.951e-05	6	121194	0	None	None	PTM (Phosphorylation)
ccr5_human	299	7.55x55	TM7	F => LeufsTer11	frameshift	0.0008167	99	121220	0	None	None	PTM (Phosphorylation) GP (contact)
ccr5_human	341		C-term	R => Ter	stop gained	3.515e-05	4	113804	0	None	None	PTM (Phosphorylation)
ccr6_human	2		N-term	S => N	missense	8.277e-06	1	120824	0	nan	0.0	PTM (N-linked Glycosylation)
ccr6_human	3		N-term	G => R	missense	1.655e-05	2	120826	0	nan	0.012	PTM (Phosphorylation)
ccr6_human	3		N-term	G => W	missense	8.276e-06	1	120826	0	nan	0.001	PTM (Phosphorylation)
ccr6_human	3		N-term	G => E	missense	8.277e-06	1	120824	0	1.0	0.0	PTM (Phosphorylation)
ccr6_human	7		N-term	N => H	missense	8.378e-06	1	119364	0	0.03	0.754	PTM (Phosphorylation)
ccr6_human	11		N-term	V => A	missense	8.375e-06	1	119410	0	0.66	0.0	PTM (N-linked Glycosylation)
ccr6_human	13		N-term	D => N	missense	3.347e-05	4	119494	0	0.56	0.001	PTM (Phosphorylation)
ccr6_human	15		N-term	S => N	missense	8.356e-06	1	119668	0	0.59	0.0	PTM (Phosphorylation)
ccr6_human	21		N-term	S => L	missense	1.663e-05	2	120236	0	0.31	0.001	PTM (Sulfation)
ccr6_human	25		N-term	S => L	missense	8.292e-06	1	120596	0	0.25	0.001	PTM (Phosphorylation)
ccr6_human	34		N-term	L => S	missense	2.476e-05	3	121172	0	0.42	0.004	PTM (Phosphorylation)
ccr6_human	40		N-term	E => K	missense	4.123e-05	5	121264	0	0.15	0.101
ccr6_human	40		N-term	E => D	missense	1.649e-05	2	121262	0	0.35	0.002
ccr6_human	43	1.29x29	TM1	Q => P	missense	8.245e-06	1	121284	0	0.09	0.163	PTM (Phosphorylation)
ccr6_human	43	1.29x29	TM1	Q => L	missense	8.245e-06	1	121284	0	0.1	0.01	PTM (Phosphorylation)
ccr6_human	46	1.32x32	TM1	R => G	missense	1.649e-05	2	121262	0	0.26	0.002	PTM (O-GalNAc)
ccr6_human	50	1.36x36	TM1	P => S	missense	8.249e-06	1	121228	0	0.01	0.986	PTM (Phosphorylation)
ccr6_human	83	2.41x41	TM2	V => I	missense	4.353e-05	5	114870	0	0.18	0.055	PTM (Phosphorylation)
ccr6_human	83	2.41x41	TM2	V => F	missense	1.741e-05	2	114870	0	0.0	0.941	PTM (Phosphorylation)
ccr6_human	89	2.47x47	TM2	A => T	missense	0.0001932	22	113900	0	0.0	0.997	PTM (Phosphorylation)
ccr6_human	102	2.60x60	TM2	W => R	missense	8.809e-06	1	113520	0	0.04	0.87
ccr6_human	109		ECL1	G => S	missense	7.671e-05	9	117318	0	0.57	0.007
ccr6_human	110	23.49x49	ECL1	A => V	missense	1.705e-05	2	117286	0	0.13	0.046	PTM (Disulfide bond)
ccr6_human	115	3.22x22	TM3	N => T	missense	8.479e-06	1	117942	0	0.31	0.017
ccr6_human	115	3.22x22	TM3	N => S	missense	8.479e-06	1	117942	0	0.25	0.021
ccr6_human	117	3.24x24	TM3	T => M	missense	1.692e-05	2	118212	0	0.32	0.001	PTM (Phosphorylation)
ccr6_human	122	3.29x29	TM3	K => I	missense	8.367e-06	1	119522	0	0.0	0.222	PTM (Phosphorylation)
ccr6_human	123	3.30x30	TM3	G => A	missense	8.355e-06	1	119688	0	0.01	0.204
ccr6_human	132	3.39x39	TM3	G => R	missense	1.656e-05	2	120804	0	0.0	0.997	PTM (Ubiquitylation)
ccr6_human	135	3.42x42	TM3	L => F	missense	8.272e-06	1	120896	0	0.02	0.246	PTM (Phosphorylation)
ccr6_human	138	3.45x45	TM3	C => R	missense	8.268e-06	1	120946	0	0.0	0.994	PTM (Phosphorylation)
ccr6_human	143	3.50x50	TM3	R => Q	missense	8.266e-06	1	120982	0	0.0	0.989	PTM (Phosphorylation) GP (contact)
ccr6_human	146	3.53x53	TM3	A => T	missense	8.266e-06	1	120980	0	0.0	0.972	PTM (Phosphorylation) GP (contact)
ccr6_human	150	34.50x50	ICL2	A => V	missense	0.0002314	28	120984	0	0.04	0.844	PTM (Phosphorylation) GP (contact)
ccr6_human	155	34.55x55	ICL2	R => W	missense	2.48e-05	3	120966	0	0.11	0.083	PTM (Phosphorylation) GP (contact)
ccr6_human	155	34.55x55	ICL2	R => Q	missense	8.267e-06	1	120964	0	0.13	0.094	PTM (Phosphorylation) GP (contact)
ccr6_human	157	34.57x57	ICL2	R => Q	missense	3.307e-05	4	120946	0	0.0	0.718	PTM (Phosphorylation) GP (contact)
ccr6_human	159		ICL2	R => S	missense	1.653e-05	2	120958	0	0.03	0.219	PTM (Phosphorylation)
ccr6_human	162	4.40x40	TM4	P => S	missense	1.654e-05	2	120948	0	0.28	0.0	PTM (Phosphorylation)
ccr6_human	163	4.41x41	TM4	R => S	missense	3.307e-05	4	120940	0	0.06	0.078	PTM (Phosphorylation)
ccr6_human	163	4.41x41	TM4	R => C	missense	2.481e-05	3	120940	0	0.01	0.015	PTM (Phosphorylation)
ccr6_human	163	4.41x41	TM4	R => H	missense	0.0001323	16	120942	0	0.77	0.004	PTM (Phosphorylation)
ccr6_human	178	4.56x56	TM4	I => T	missense	1.655e-05	2	120882	0	0.02	0.081	PTM (Phosphorylation)
ccr6_human	180	4.58x58	TM4	S => T	missense	8.273e-06	1	120868	0	0.93	0.006
ccr6_human	186	4.64x64	TM4	N => S	missense	2.482e-05	3	120872	0	0.82	0.003
ccr6_human	192		ECL2	Q => R	missense	8.27e-06	1	120916	0	0.16	0.043
ccr6_human	192		ECL2	Q => H	missense	1.654e-05	2	120920	0	0.08	0.008
ccr6_human	196		ECL2	V => I	missense	4.133e-05	5	120970	0	0.29	0.008	PTM (Phosphorylation)
ccr6_human	196		ECL2	V => L	missense	8.267e-06	1	120970	0	0.05	0.026	PTM (Phosphorylation)
ccr6_human	200		ECL2	K => Q	missense	1.652e-05	2	121044	0	0.19	0.015	PTM (Phosphorylation)
ccr6_human	202		ECL2	Q => R	missense	8.259e-06	1	121084	0	0.43	0.001	PTM (Phosphorylation)
ccr6_human	205		ECL2	S => T	missense	8.255e-06	1	121146	0	0.34	0.035	PTM (Phosphorylation)
ccr6_human	209	5.33x34	TM5	R => T	missense	1.65e-05	2	121230	0	0.64	0.001	PTM (Phosphorylation)
ccr6_human	233	5.57x57	TM5	C => Y	missense	8.237e-06	1	121408	0	0.0	0.956	PTM (Phosphorylation)
ccr6_human	236	5.60x60	TM5	F => L	missense	9.06e-05	11	121410	0	0.31	0.006	PTM (Phosphorylation)
ccr6_human	254	6.35x35	TM6	R => C	missense	2.471e-05	3	121406	0	0.03	0.683	PTM (Acetylation)
ccr6_human	254	6.35x35	TM6	R => H	missense	3.295e-05	4	121410	0	0.02	0.984	PTM (Acetylation)
ccr6_human	257	6.38x38	TM6	I => L	missense	8.237e-06	1	121410	0	0.87	0.009	PTM (Phosphorylation)
ccr6_human	267	6.48x48	TM6	Q => R	missense	8.237e-06	1	121408	0	0.02	0.998	PTM (Phosphorylation)
ccr6_human	277	6.58x58	TM6	T => M	missense	8.237e-06	1	121410	0	0.08	0.75	PTM (Phosphorylation)
ccr6_human	283	6.64x64	TM6	K => R	missense	8.236e-06	1	121412	0	0.54	0.002	PTM (Phosphorylation)
ccr6_human	284	6.65x65	TM6	M => K	missense	8.236e-06	1	121412	0	0.24	0.014
ccr6_human	287	7.24x23	TM7	S => Y	missense	1.647e-05	2	121412	0	0.0	0.897	PTM (Phosphorylation)
ccr6_human	291	7.28x27	TM7	E => K	missense	3.295e-05	4	121412	0	0.08	0.067	PTM (Phosphorylation)
ccr6_human	294	7.31x30	TM7	I => T	missense	1.647e-05	2	121412	0	0.14	0.008	PTM (Phosphorylation)
ccr6_human	297	7.34x33	TM7	T => M	missense	4.942e-05	6	121412	0	0.01	0.166	PTM (Phosphorylation)
ccr6_human	305	7.42x41	TM7	A => P	missense	8.237e-06	1	121410	0	0.0	1.0	PTM (Phosphorylation)
ccr6_human	311	7.48x48	TM7	L => P	missense	8.237e-06	1	121410	0	0.0	0.998	PTM (Phosphorylation)
ccr6_human	313	7.50x50	TM7	P => R	missense	8.237e-06	1	121408	0	0.0	1.0	PTM (Phosphorylation)
ccr6_human	314	7.51x51	TM7	V => M	missense	8.237e-06	1	121410	0	0.04	0.72	PTM (Phosphorylation)
ccr6_human	317	7.54x54	TM7	A => T	missense	1.647e-05	2	121410	0	0.0	0.987	PTM (Phosphorylation)
ccr6_human	330	8.57x57	H8	I => L	missense	8.237e-06	1	121404	0	0.07	0.007	PTM (Phosphorylation)
ccr6_human	339	8.66x66	H8	R => G	missense	8.239e-06	1	121370	0	0.07	0.01	PTM (Phosphorylation)
ccr6_human	340	8.67x67	H8	K => T	missense	4.944e-05	6	121366	0	0.04	0.043	SodiumPocket MicroSwitch PTM (Retinal protein)
ccr6_human	345		C-term	G => S	missense	0.0005358	65	121312	0	0.66	0.002	PTM (Phosphorylation)
ccr6_human	348		C-term	C => Y	missense	8.246e-06	1	121274	0	0.13	0.04	PTM (Phosphorylation)
ccr6_human	350		C-term	G => R	missense	2.474e-05	3	121246	1	0.89	0.0	PTM (Phosphorylation)
ccr6_human	358		C-term	R => W	missense	1.652e-05	2	121034	0	0.0	0.841	SodiumPocket MicroSwitch PTM (Phosphorylation)
ccr6_human	358		C-term	R => Q	missense	8.264e-06	1	121012	0	0.01	0.497	SodiumPocket MicroSwitch PTM (Phosphorylation)
ccr6_human	364		C-term	A => T	missense	0.0001496	18	120338	0	0.42	0.11	PTM (Phosphorylation)
ccr6_human	364		C-term	A => S	missense	8.31e-06	1	120338	0	0.6	0.02	PTM (Phosphorylation)
ccr6_human	369		C-term	A => V	missense	0.005533	657	118748	3	0.18	0.006	PTM (Acetylation)
ccr6_human	369		C-term	A => G	missense	4.211e-05	5	118748	0	0.57	0.006	PTM (Acetylation)
ccr6_human	370		C-term	S => L	missense	8.439e-06	1	118504	0	0.0	0.286	PTM (Phosphorylation)
ccr6_human	374		C-term	M => I	missense	8.54e-06	1	117094	0	0.16	0.02	PTM (Phosphorylation)
ccr6_human	157	34.57x57	ICL2	R => Ter	stop gained	1.654e-05	2	120954	0	None	None	PTM (Phosphorylation) GP (contact)
ccr6_human	168	4.46x46	TM4	C => Ter	stop gained	8.27e-06	1	120912	0	None	None	PTM (Phosphorylation)
ccr6_human	174	4.52x52	TM4	L => CysfsTer40	frameshift	1.654e-05	2	120894	0	None	None	PTM (Phosphorylation)
ccr6_human	176	4.54x54	TM4	V => SerfsTer23	frameshift	8.273e-06	1	120878	0	None	None
ccr6_human	286		ECL3	R => Ter	stop gained	1.647e-05	2	121410	0	None	None	PTM (Methylation)
ccr6_human	368		C-term	N => ValfsTer10	frameshift	8.373e-06	1	119434	0	None	None	PTM (Acetylation)
ccr7_human	377		C-term	S => A	missense	8.717e-06	1	114722	0	0.11	0.751	PTM (Phosphorylation)
ccr7_human	363		C-term	R => H	missense	1.662e-05	2	120338	0	0.01	0.032	PTM (Phosphorylation)
ccr7_human	362		C-term	R => Q	missense	8.287e-06	1	120670	0	0.02	0.206	PTM (Phosphorylation)
ccr7_human	362		C-term	R => W	missense	9.107e-05	11	120780	0	0.0	0.88	PTM (Phosphorylation)
ccr7_human	359		C-term	R => Q	missense	8.26e-06	1	121068	0	0.16	0.862	PTM (Phosphorylation)
ccr7_human	359		C-term	R => W	missense	8.256e-06	1	121130	0	0.0	0.995	PTM (Phosphorylation)
ccr7_human	355		C-term	W => R	missense	4.123e-05	5	121276	0	0.08	0.027	PTM (Phosphorylation)
ccr7_human	353		C-term	R => Q	missense	1.649e-05	2	121294	0	0.29	0.002	PTM (Phosphorylation)
ccr7_human	353		C-term	R => G	missense	8.243e-06	1	121310	0	0.33	0.001	PTM (Phosphorylation)
ccr7_human	348	8.65x65	H8	S => N	missense	8.241e-06	1	121338	0	0.16	0.275	PTM (Phosphorylation)
ccr7_human	344	8.61x61	H8	L => V	missense	8.24e-06	1	121352	0	0.12	0.051	SodiumPocket MicroSwitch PTM (Phosphorylation)
ccr7_human	343	8.60x60	H8	D => H	missense	8.241e-06	1	121350	0	0.03	0.841	PTM (Phosphorylation)
ccr7_human	339	8.56x56	H8	K => R	missense	4.12e-05	5	121352	0	0.35	0.077	PTM (Phosphorylation)
ccr7_human	337	8.54x54	H8	L => F	missense	8.24e-06	1	121352	0	0.0	0.974	PTM (Phosphorylation)
ccr7_human	335	8.52x52	H8	N => S	missense	8.241e-06	1	121348	0	0.18	0.003	PTM (Phosphorylation)
ccr7_human	334	8.51x51	H8	R => C	missense	4.12e-05	5	121348	1	0.0	1.0	PTM (Phosphorylation) GP (contact)
ccr7_human	330	8.47x47	H8	G => S	missense	8.24e-06	1	121360	0	0.0	1.0	PTM (Phosphorylation) GP (contact)
ccr7_human	327	7.54x54	TM7	A => T	missense	8.24e-06	1	121360	0	0.01	0.989	PTM (Phosphorylation)
ccr7_human	321	7.48x48	TM7	V => I	missense	8.24e-06	1	121364	0	0.04	0.013	PTM (Phosphorylation)
ccr7_human	318	7.45x45	TM7	R => C	missense	1.648e-05	2	121366	0	0.0	1.0	PTM (Phosphorylation)
ccr7_human	317	7.44x43	TM7	V => I	missense	4.119e-05	5	121374	0	0.19	0.009	PTM (Phosphorylation)
ccr7_human	310	7.37x36	TM7	V => I	missense	3.296e-05	4	121366	0	0.3	0.03	PTM (Phosphorylation)
ccr7_human	309	7.36x35	TM7	D => N	missense	1.648e-05	2	121376	0	0.02	0.997	PTM (Phosphorylation)
ccr7_human	307	7.34x33	TM7	A => T	missense	3.295e-05	4	121380	0	0.05	0.998	PTM (Phosphorylation)
ccr7_human	296		ECL3	S => T	missense	1.648e-05	2	121388	0	1.0	0.002	PTM (Retinal protein)
ccr7_human	293	6.65x65	TM6	I => T	missense	2.471e-05	3	121390	0	0.6	0.001	PTM (Retinal protein)
ccr7_human	290	6.62x62	TM6	N => S	missense	8.238e-06	1	121388	0	0.82	0.023	PTM (Phosphorylation)
ccr7_human	287	6.59x59	TM6	T => M	missense	0.0001483	18	121390	0	0.0	0.998	PTM (Phosphorylation)
ccr7_human	271	6.43x43	TM6	V => A	missense	8.24e-06	1	121356	0	0.09	0.951	PTM (Acetylation)
ccr7_human	270	6.42x42	TM6	V => M	missense	8.241e-06	1	121344	0	0.07	0.149	PTM (Phosphorylation)
ccr7_human	266	6.38x38	TM6	I => V	missense	8.243e-06	1	121322	0	0.22	0.714	PTM (Phosphorylation)
ccr7_human	259	6.31x31	TM6	N => K	missense	8.243e-06	1	121308	0	0.07	0.992	PTM (Phosphorylation)
ccr7_human	259	6.31x31	TM6	N => S	missense	1.649e-05	2	121308	0	0.01	0.988	PTM (Phosphorylation)
ccr7_human	254		ICL3	R => H	missense	8.246e-06	1	121266	0	0.08	0.262	PTM (Acetylation)
ccr7_human	254		ICL3	R => C	missense	8.246e-06	1	121276	0	0.0	0.982	PTM (Acetylation)
ccr7_human	248	5.63x63	TM5	R => L	missense	4.949e-05	6	121230	0	0.03	0.055	PTM (Phosphorylation)
ccr7_human	248	5.63x63	TM5	R => H	missense	8.249e-06	1	121230	0	0.07	0.052	PTM (Phosphorylation)
ccr7_human	248	5.63x63	TM5	R => C	missense	3.3e-05	4	121230	0	0.0	0.849	PTM (Phosphorylation)
ccr7_human	245	5.60x60	TM5	V => A	missense	1.65e-05	2	121238	0	0.08	0.026	PTM (Phosphorylation)
ccr7_human	242	5.57x57	TM5	C => Y	missense	8.25e-06	1	121214	0	0.0	0.988	PTM (Phosphorylation)
ccr7_human	239	5.54x54	TM5	M => I	missense	8.25e-06	1	121208	0	0.0	0.999	PTM (Phosphorylation)
ccr7_human	231	5.46x461	TM5	G => C	missense	8.254e-06	1	121160	0	0.0	1.0	PTM (Acetylation)
ccr7_human	229	5.44x45	TM5	V => M	missense	3.302e-05	4	121150	0	0.03	0.928	PTM (Phosphorylation)
ccr7_human	226	5.41x42	TM5	A => S	missense	8.256e-06	1	121126	0	0.63	0.047	PTM (Phosphorylation)
ccr7_human	224	5.39x40	TM5	Q => H	missense	2.477e-05	3	121108	0	0.29	0.014	PTM (Methylation)
ccr7_human	224	5.39x40	TM5	Q => R	missense	8.256e-06	1	121122	0	0.67	0.008	PTM (Methylation)
ccr7_human	217		ECL2	V => M	missense	1.651e-05	2	121106	0	0.11	0.396	PTM (Phosphorylation)
ccr7_human	211	45.51x51	ECL2	S => Y	missense	8.257e-06	1	121112	0	0.02	0.981	PTM (Phosphorylation)
ccr7_human	209		ECL2	R => Q	missense	1.652e-05	2	121096	0	0.3	0.787	PTM (Phosphorylation)
ccr7_human	207		ECL2	A => V	missense	8.257e-06	1	121108	0	0.37	0.001	SodiumPocket MicroSwitch
ccr7_human	188	4.55x55	TM4	V => M	missense	1.65e-05	2	121224	0	0.07	0.089	PTM (Phosphorylation)
ccr7_human	183	4.50x50	TM4	W => S	missense	8.249e-06	1	121222	0	0.0	1.0	PTM (N-linked Glycosylation)
ccr7_human	171	4.38x38	TM4	V => I	missense	1.65e-05	2	121228	0	0.36	0.021	PTM (Phosphorylation)
ccr7_human	170		ICL2	R => H	missense	5.773e-05	7	121248	0	0.0	0.932	PTM (Phosphorylation)
ccr7_human	170		ICL2	R => C	missense	1.65e-05	2	121224	0	0.0	0.953	PTM (Phosphorylation)
ccr7_human	168	34.57x57	ICL2	R => H	missense	2.475e-05	3	121234	0	0.0	1.0	PTM (Phosphorylation) GP (contact)
ccr7_human	166	34.55x55	ICL2	R => C	missense	8.25e-06	1	121210	0	0.0	0.999	GP (contact)
ccr7_human	160	3.56x56	TM3	Q => R	missense	8.249e-06	1	121232	0	0.18	0.026	PTM (Phosphorylation) GP (contact)
ccr7_human	156	3.52x52	TM3	V => M	missense	1.65e-05	2	121216	0	0.01	0.305	PTM (Phosphorylation)
ccr7_human	152	3.48x48	TM3	I => T	missense	4.95e-05	6	121208	0	0.0	0.392	PTM (Phosphorylation)
ccr7_human	152	3.48x48	TM3	I => L	missense	8.25e-06	1	121214	0	0.03	0.019	PTM (Phosphorylation)
ccr7_human	149	3.45x45	TM3	C => S	missense	1.651e-05	2	121168	0	0.16	0.05	PTM (Phosphorylation)
ccr7_human	135	3.31x31	TM3	I => V	missense	8.25e-06	1	121212	0	0.39	0.015	PTM (Phosphorylation)
ccr7_human	133	3.29x29	TM3	F => V	missense	8.25e-06	1	121218	0	0.13	0.593	SodiumPocket MicroSwitch PTM (Phosphorylation)
ccr7_human	126	3.22x22	TM3	V => I	missense	1.649e-05	2	121272	0	0.19	0.003	PTM (Phosphorylation)
ccr7_human	125	3.21x21	TM3	G => S	missense	8.246e-06	1	121272	0	0.01	0.997	PTM (Phosphorylation)
ccr7_human	120	2.66x66	TM2	K => N	missense	8.243e-06	1	121320	0	0.2	0.219	PTM (Phosphorylation)
ccr7_human	119	2.65x65	TM2	A => D	missense	2.473e-05	3	121328	0	0.07	0.962	PTM (Phosphorylation)
ccr7_human	118	2.64x64	TM2	A => T	missense	1.648e-05	2	121324	0	0.03	0.041	PTM (Phosphorylation)
ccr7_human	117	2.63x63	TM2	S => R	missense	8.242e-06	1	121332	0	0.01	0.964	PTM (Phosphorylation)
ccr7_human	115	2.61x61	TM2	A => S	missense	1.648e-05	2	121342	0	0.01	0.998
ccr7_human	106	2.52x52	TM2	L => V	missense	0.000412	50	121372	0	0.04	0.702
ccr7_human	105	2.51x51	TM2	I => N	missense	8.239e-06	1	121374	0	0.0	0.774	PTM (Phosphorylation)
ccr7_human	101	2.47x47	TM2	A => E	missense	8.239e-06	1	121378	0	0.0	0.99	PTM (Phosphorylation)
ccr7_human	94	2.40x40	TM2	D => N	missense	8.238e-06	1	121386	0	0.0	0.995
ccr7_human	81	1.55x55	TM1	L => S	missense	8.237e-06	1	121398	0	0.06	0.075	PTM (Phosphorylation)
ccr7_human	80	1.54x54	TM1	V => M	missense	8.237e-06	1	121398	0	0.42	0.025	PTM (Phosphorylation)
ccr7_human	71	1.45x45	TM1	V => M	missense	1.647e-05	2	121400	0	0.05	0.011	PTM (Methylation)
ccr7_human	65	1.39x39	TM1	Y => C	missense	2.471e-05	3	121402	0	0.0	0.99	PTM (Phosphorylation)
ccr7_human	63	1.37x37	TM1	I => V	missense	8.237e-06	1	121404	0	1.0	0.0	PTM (Phosphorylation)
ccr7_human	60	1.34x34	TM1	F => S	missense	8.237e-06	1	121404	0	0.0	0.994	PTM (Phosphorylation)
ccr7_human	59	1.33x33	TM1	W => S	missense	8.237e-06	1	121406	0	0.38	0.011	PTM (Proteolytic Cleavage)
ccr7_human	54	1.28x28	TM1	R => Q	missense	8.237e-06	1	121398	0	0.02	0.701	PTM (Phosphorylation)
ccr7_human	49		N-term	S => Y	missense	8.238e-06	1	121382	0	0.08	0.001	PTM (Phosphorylation)
ccr7_human	43		N-term	L => F	missense	1.648e-05	2	121344	0	0.05	0.042	PTM (Phosphorylation)
ccr7_human	40		N-term	D => G	missense	8.245e-06	1	121288	0	0.03	0.728
ccr7_human	29		N-term	T => M	missense	1.665e-05	2	120106	0	0.01	0.657	PTM (Phosphorylation)
ccr7_human	26		N-term	D => E	missense	8.371e-06	1	119458	0	0.33	0.009	PTM (Sulfation)
ccr7_human	21		N-term	V => I	missense	8.488e-06	1	117808	0	0.35	0.003	PTM (Sulfation)
ccr7_human	16		N-term	L => F	missense	8.265e-06	1	120994	0	nan	0.006	PTM (Phosphorylation)
ccr7_human	14		N-term	A => P	missense	8.279e-06	1	120782	0	nan	0.265	PTM (Phosphorylation)
ccr7_human	12		N-term	V => L	missense	8.295e-06	1	120554	0	nan	0.002	PTM (Phosphorylation)
ccr7_human	10		N-term	V => M	missense	5.819e-05	7	120296	0	nan	0.011	PTM (Phosphorylation)
ccr7_human	9		N-term	S => N	missense	4.993e-05	6	120166	0	nan	0.0
ccr7_human	2		N-term	D => N	missense	8.239e-06	1	121378	0	nan	0.655	PTM (N-linked Glycosylation)
ccr7_human	308	7.35x34	TM7	Y => Ter	stop gained	8.239e-06	1	121374	0	None	None	PTM (Palmitoylation)
ccr7_human	118	2.64x64	TM2	A => GlyfsTer21	frameshift	8.243e-06	1	121318	0	None	None	PTM (Phosphorylation)
ccr8_human	6		N-term	D => H	missense	3.323e-05	4	120366	0	0.0	0.195	PTM (Phosphorylation)
ccr8_human	9		N-term	V => M	missense	8.284e-06	1	120718	0	nan	0.003
ccr8_human	13		N-term	T => N	missense	1.652e-05	2	121084	0	nan	0.157	PTM (Phosphorylation)
ccr8_human	14		N-term	D => N	missense	2.476e-05	3	121164	0	nan	0.341	PTM (Phosphorylation)
ccr8_human	15		N-term	Y => H	missense	2.475e-05	3	121226	0	nan	0.553	PTM (Phosphorylation)
ccr8_human	15		N-term	Y => C	missense	8.248e-06	1	121238	0	nan	0.711	PTM (Phosphorylation)
ccr8_human	20		N-term	I => S	missense	8.242e-06	1	121336	0	nan	0.0	PTM (Phosphorylation)
ccr8_human	27	1.24x24	TM1	A => G	missense	0.2154	26149	121372	3418	nan	0.0	PTM (Phosphorylation)
ccr8_human	27	1.24x24	TM1	A => V	missense	4.12e-05	5	121372	0	nan	0.004	PTM (Phosphorylation)
ccr8_human	29	1.26x26	TM1	L => V	missense	4.119e-05	5	121380	0	nan	0.728	PTM (Phosphorylation)
ccr8_human	30	1.27x27	TM1	I => T	missense	2.472e-05	3	121382	0	nan	0.178	PTM (N-linked Glycosylation)
ccr8_human	33	1.30x30	TM1	N => S	missense	8.238e-06	1	121386	0	nan	0.011	PTM (Phosphorylation)
ccr8_human	42	1.39x39	TM1	Y => C	missense	8.238e-06	1	121388	0	0.0	0.992	PTM (Phosphorylation)
ccr8_human	43	1.40x40	TM1	C => S	missense	0.0009556	116	121388	1	1.0	0.074	PTM (Phosphorylation)
ccr8_human	49	1.46x46	TM1	S => N	missense	8.238e-06	1	121388	0	0.0	0.063	PTM (Phosphorylation)
ccr8_human	61	1.58x58	TM1	V => A	missense	8.239e-06	1	121378	0	0.01	0.314	PTM (Acetylation)
ccr8_human	71	2.40x40	TM2	D => G	missense	8.24e-06	1	121366	0	0.0	1.0	PTM (Methylation)
ccr8_human	75	2.44x44	TM2	L => F	missense	1.648e-05	2	121366	0	0.03	0.914	PTM (Proteolytic Cleavage)
ccr8_human	78	2.47x47	TM2	A => T	missense	8.239e-06	1	121374	0	0.04	0.681	PTM (N-linked Glycosylation)
ccr8_human	79	2.48x48	TM2	L => P	missense	8.238e-06	1	121386	0	0.01	0.953
ccr8_human	81	2.50x50	TM2	D => G	missense	8.238e-06	1	121384	0	0.0	1.0	PTM (Phosphorylation)
ccr8_human	82	2.51x51	TM2	L => M	missense	1.648e-05	2	121380	0	0.0	0.986	PTM (Proteolytic Cleavage)
ccr8_human	83	2.52x52	TM2	L => H	missense	8.238e-06	1	121394	0	0.0	0.998	PTM (Phosphorylation)
ccr8_human	85	2.54x54	TM2	V => F	missense	1.648e-05	2	121386	0	0.0	0.998	PTM (Phosphorylation)
ccr8_human	90	2.59x59	TM2	F => L	missense	3.295e-05	4	121402	0	0.04	0.997	PTM (Disulfide bond)
ccr8_human	98	23.49x49	ECL1	Q => P	missense	8.237e-06	1	121402	0	0.0	0.976	PTM (Disulfide bond)
ccr8_human	110	3.29x29	TM3	S => F	missense	0.0009226	112	121396	0	0.0	0.994	PTM (Disulfide bond)
ccr8_human	119	3.38x38	TM3	S => N	missense	2.474e-05	3	121244	0	0.0	0.951	PTM (Phosphorylation)
ccr8_human	146	4.38x38	TM4	T => M	missense	1.648e-05	2	121382	0	0.01	0.999	PTM (Phosphorylation)
ccr8_human	152	4.44x44	TM4	T => M	missense	0.0002307	28	121372	0	0.11	0.013	PTM (Phosphorylation)
ccr8_human	172	4.64x65	TM4	Y => C	missense	8.242e-06	1	121336	0	0.13	0.695
ccr8_human	180		ECL2	V => F	missense	8.243e-06	1	121320	0	0.7	0.008
ccr8_human	182		ECL2	Q => R	missense	8.244e-06	1	121304	0	0.33	0.507	PTM (Phosphorylation)
ccr8_human	183	45.50x50	ECL2	C => R	missense	8.244e-06	1	121300	0	0.0	0.999	PTM (N-linked Glycosylation)
ccr8_human	184	45.51x51	ECL2	Y => C	missense	8.244e-06	1	121302	0	0.19	0.895	PTM (Phosphorylation)
ccr8_human	186		ECL2	F => Y	missense	8.245e-06	1	121284	0	0.86	0.008
ccr8_human	189		ECL2	Q => R	missense	1.649e-05	2	121288	0	0.45	0.222
ccr8_human	190	5.30x31	TM5	Q => K	missense	8.245e-06	1	121282	0	0.43	0.038
ccr8_human	191	5.31x32	TM5	T => P	missense	7.421e-05	9	121282	0	0.41	0.718	PTM (N-linked Glycosylation)
ccr8_human	191	5.31x32	TM5	T => I	missense	0.0002968	36	121286	0	0.23	0.689	PTM (N-linked Glycosylation)
ccr8_human	195	5.35x36	TM5	K => N	missense	8.247e-06	1	121262	0	0.03	0.996	PTM (Phosphorylation)
ccr8_human	196	5.36x37	TM5	I => L	missense	8.246e-06	1	121264	0	0.83	0.006	PTM (Phosphorylation)
ccr8_human	196	5.36x37	TM5	I => S	missense	9.895e-05	12	121270	0	0.41	0.315	PTM (Phosphorylation)
ccr8_human	198	5.38x39	TM5	T => I	missense	8.247e-06	1	121256	0	0.48	0.006	PTM (N-linked Glycosylation)
ccr8_human	199	5.39x40	TM5	N => S	missense	4.123e-05	5	121260	0	0.62	0.676	PTM (Phosphorylation)
ccr8_human	205	5.45x46	TM5	L => S	missense	1.649e-05	2	121250	0	0.0	0.978	PTM (Phosphorylation)
ccr8_human	208	5.48x48	TM5	L => W	missense	8.247e-06	1	121252	0	0.0	0.999	PTM (Phosphorylation)
ccr8_human	218	5.58x58	TM5	Y => C	missense	8.247e-06	1	121250	0	0.0	1.0	PTM (Phosphorylation)
ccr8_human	233	6.30x30	TM6	K => E	missense	8.248e-06	1	121240	0	0.0	0.967	PTM (Phosphorylation)
ccr8_human	233	6.30x30	TM6	K => R	missense	8.248e-06	1	121246	0	0.1	0.4	PTM (Phosphorylation)
ccr8_human	233	6.30x30	TM6	K => N	missense	8.248e-06	1	121242	0	0.0	0.777	PTM (Phosphorylation)
ccr8_human	235	6.32x32	TM6	K => N	missense	4.124e-05	5	121236	0	0.0	0.978	PTM (Ubiquitylation) GP (contact)
ccr8_human	236	6.33x33	TM6	A => D	missense	8.248e-06	1	121242	0	0.0	0.998	PTM (Phosphorylation) GP (contact)
ccr8_human	239	6.36x36	TM6	L => F	missense	8.248e-06	1	121240	0	0.0	0.996	PTM (Phosphorylation) GP (contact)
ccr8_human	240	6.37x37	TM6	V => M	missense	2.474e-05	3	121244	0	0.0	0.997	PTM (Phosphorylation) GP (contact)
ccr8_human	245	6.42x42	TM6	I => L	missense	8.248e-06	1	121246	0	0.04	0.02	PTM (Phosphorylation)
ccr8_human	250	6.47x47	TM6	F => S	missense	8.248e-06	1	121246	0	0.02	0.817	PTM (Phosphorylation)
ccr8_human	254	6.51x51	TM6	F => Y	missense	8.249e-06	1	121228	0	1.0	0.944	PTM (Acetylation)
ccr8_human	263	6.60x60	TM6	L => S	missense	8.249e-06	1	121228	0	0.0	0.998	PTM (Phosphorylation)
ccr8_human	270		ECL3	D => N	missense	1.65e-05	2	121222	0	0.59	0.042	PTM (Phosphorylation)
ccr8_human	270		ECL3	D => E	missense	1.65e-05	2	121216	0	0.05	0.077	PTM (Phosphorylation)
ccr8_human	272	7.25x24	TM7	C => Y	missense	8.25e-06	1	121218	0	0.0	0.999	PTM (Phosphorylation)
ccr8_human	273	7.26x25	TM7	S => T	missense	8.25e-06	1	121212	0	0.54	0.027	PTM (Phosphorylation)
ccr8_human	294	7.47x47	TM7	C => S	missense	8.245e-06	1	121290	0	0.0	0.951	PTM (Phosphorylation)
ccr8_human	303	7.56x56	TM7	V => A	missense	1.649e-05	2	121280	0	0.3	0.009	PTM (Phosphorylation) GP (contact)
ccr8_human	307	8.50x50	H8	F => L	missense	8.247e-06	1	121250	0	0.01	0.963	PTM (Phosphorylation)
ccr8_human	310	8.53x53	H8	H => R	missense	8.251e-06	1	121204	0	0.0	0.04	PTM (Phosphorylation)
ccr8_human	311	8.54x54	H8	L => F	missense	2.475e-05	3	121198	0	0.0	0.303	PTM (Phosphorylation)
ccr8_human	312	8.55x55	H8	S => L	missense	2.476e-05	3	121182	0	0.66	0.001	PTM (Retinal protein)
ccr8_human	314	8.57x57	H8	I => T	missense	8.253e-06	1	121170	0	0.02	0.272	PTM (Phosphorylation)
ccr8_human	315	8.58x58	H8	F => L	missense	8.254e-06	1	121158	0	0.11	0.011	PTM (Phosphorylation)
ccr8_human	318		C-term	S => N	missense	8.257e-06	1	121114	0	0.3	0.459	PTM (Phosphorylation)
ccr8_human	319		C-term	C => F	missense	8.258e-06	1	121096	0	0.1	0.002	PTM (Phosphorylation)
ccr8_human	327		C-term	G => E	missense	8.28e-06	1	120780	0	0.36	0.209	PTM (Phosphorylation)
ccr8_human	330		C-term	M => I	missense	1.657e-05	2	120668	0	0.59	0.0	PTM (Phosphorylation)
ccr8_human	331		C-term	P => S	missense	8.289e-06	1	120644	0	0.23	0.008	PTM (Phosphorylation)
ccr8_human	333		C-term	E => V	missense	8.297e-06	1	120528	0	0.11	0.266	PTM (Phosphorylation)
ccr8_human	341		C-term	C => G	missense	6.668e-05	8	119984	0	0.35	0.003	PTM (Phosphorylation)
ccr8_human	344		C-term	H => Y	missense	8.376e-06	1	119394	0	1.0	0.0	SodiumPocket MicroSwitch PTM (Phosphorylation)
ccr8_human	347		C-term	R => C	missense	5.047e-05	6	118886	0	0.05	0.265	PTM (Phosphorylation)
ccr8_human	347		C-term	R => H	missense	1.684e-05	2	118796	0	0.35	0.001	PTM (Phosphorylation)
ccr8_human	351		C-term	V => I	missense	0.0001191	14	117512	0	0.49	0.0	PTM (Phosphorylation)
ccr8_human	355		C-term	L => F	missense	1.736e-05	2	115206	0	0.0	0.994	PTM (Phosphorylation)
ccr8_human	3		N-term	Y => LeufsTer7	frameshift	8.338e-06	1	119928	0	None	None	PTM (Phosphorylation)
ccr8_human	62	1.59x59	TM1	V => Ter	stop gained	8.247e-06	1	121250	0	None	None	PTM (Phosphorylation)
ccr8_human	132	3.51x51	TM3	Y => Ter	stop gained	8.238e-06	1	121384	0	None	None	PTM (Ubiquitylation)
ccr8_human	90	2.59x59	TM2	F => Ter	stop gained	8.238e-06	1	121382	0	None	None	PTM (Disulfide bond)
ccr8_human	158	4.50x50	TM4	W => Ter	stop gained	8.239e-06	1	121368	0	None	None	PTM (Phosphorylation)
ccr8_human	251	6.48x48	TM6	W => Ter	stop gained	8.249e-06	1	121228	0	None	None	PTM (Phosphorylation)
ccr8_human	276	7.29x28	TM7	Q => HisfsTer3	frameshift	8.249e-06	1	121224	0	None	None
ccr8_human	325		C-term	Y => ThrfsTer2	frameshift	1.654e-05	2	120902	0	None	None	PTM (Phosphorylation)
ccr9_human	6		N-term	F => V	missense	8.237e-06	1	121398	0	0.61	0.001	PTM (Phosphorylation)
ccr9_human	6		N-term	F => L	missense	8.237e-06	1	121398	0	0.77	0.001	PTM (Phosphorylation)
ccr9_human	29		N-term	V => I	missense	3.296e-05	4	121358	0	0.2	0.0	PTM (Phosphorylation)
ccr9_human	30		N-term	N => D	missense	8.239e-06	1	121368	0	0.39	0.001	PTM (N-linked Glycosylation)
ccr9_human	33		N-term	F => L	missense	8.238e-06	1	121384	0	0.65	0.0	PTM (Phosphorylation)
ccr9_human	57	1.41x41	TM1	L => F	missense	8.236e-06	1	121412	0	0.05	0.052	PTM (Phosphorylation)
ccr9_human	60	1.44x44	TM1	I => L	missense	9.068e-05	11	121302	0	0.55	0.003	PTM (Phosphorylation)
ccr9_human	61	1.45x45	TM1	V => M	missense	1.648e-05	2	121386	0	0.02	0.028	PTM (Acetylation)
ccr9_human	69	1.53x53	TM1	V => I	missense	5.766e-05	7	121410	0	0.0	0.909	PTM (Proteolytic Cleavage)
ccr9_human	76	1.60x60	TM1	C => G	missense	8.236e-06	1	121412	0	0.26	0.811	PTM (Proteolytic Cleavage)
ccr9_human	77	12.48x48	ICL1	T => P	missense	8.236e-06	1	121412	0	0.06	0.734	PTM (N-linked Glycosylation)
ccr9_human	81	2.37x37	TM2	T => I	missense	8.236e-06	1	121412	0	0.0	0.979	PTM (Phosphorylation)
ccr9_human	82	2.38x38	TM2	M => V	missense	1.647e-05	2	121412	0	0.05	0.326	PTM (Proteolytic Cleavage)
ccr9_human	83	2.39x39	TM2	T => N	missense	8.236e-06	1	121412	0	0.0	0.998	PTM (Phosphorylation)
ccr9_human	84	2.40x40	TM2	D => N	missense	2.471e-05	3	121412	0	0.0	0.991	PTM (Phosphorylation)
ccr9_human	85	2.41x41	TM2	M => T	missense	6.589e-05	8	121412	0	0.4	0.002	PTM (Phosphorylation)
ccr9_human	86	2.42x42	TM2	F => L	missense	6.589e-05	8	121412	0	0.0	0.838	PTM (Proteolytic Cleavage)
ccr9_human	87	2.43x43	TM2	L => P	missense	8.236e-06	1	121412	0	0.0	0.999
ccr9_human	91	2.47x47	TM2	A => T	missense	9.06e-05	11	121410	0	0.01	0.945
ccr9_human	92	2.48x48	TM2	I => V	missense	0.005518	670	121410	3	0.48	0.06	PTM (Proteolytic Cleavage)
ccr9_human	96	2.52x52	TM2	L => I	missense	8.237e-06	1	121410	0	0.02	0.893	PTM (Phosphorylation)
ccr9_human	102	2.58x58	TM2	P => S	missense	0.0005354	65	121402	0	0.0	1.0
ccr9_human	105	2.61x61	TM2	A => P	missense	8.237e-06	1	121404	0	0.0	0.999	PTM (Phosphorylation)
ccr9_human	109	2.65x65	TM2	A => T	missense	8.237e-06	1	121400	0	0.39	0.013
ccr9_human	110	2.66x66	TM2	D => N	missense	0.0008896	108	121402	0	0.13	0.02	PTM (Disulfide bond)
ccr9_human	117	3.23x23	TM3	F => I	missense	8.237e-06	1	121402	0	0.23	0.026	PTM (Phosphorylation)
ccr9_human	142	3.48x48	TM3	V => M	missense	0.0002965	36	121402	0	0.04	0.529	PTM (Phosphorylation)
ccr9_human	142	3.48x48	TM3	V => L	missense	8.237e-06	1	121402	0	0.09	0.662	PTM (Phosphorylation)
ccr9_human	144	3.50x50	TM3	R => G	missense	8.237e-06	1	121400	0	0.0	1.0	PTM (Acetylation) GP (contact)
ccr9_human	152	34.51x51	ICL2	M => T	missense	2.471e-05	3	121384	0	1.0	0.001	PTM (Phosphorylation) GP (contact)
ccr9_human	152	34.51x51	ICL2	M => I	missense	8.239e-06	1	121380	0	0.13	0.009	PTM (Phosphorylation) GP (contact)
ccr9_human	156	34.55x55	ICL2	T => N	missense	1.648e-05	2	121362	0	1.0	0.002	PTM (Phosphorylation) GP (contact)
ccr9_human	157	34.56x56	ICL2	W => L	missense	8.241e-06	1	121350	0	0.65	0.03	PTM (Phosphorylation) GP (contact)
ccr9_human	161	4.38x38	TM4	R => M	missense	8.242e-06	1	121328	0	0.0	0.992	PTM (Phosphorylation)
ccr9_human	162	4.39x39	TM4	L => F	missense	1.649e-05	2	121316	0	0.03	0.962	PTM (Phosphorylation)
ccr9_human	167	4.44x44	TM4	M => I	missense	1.649e-05	2	121282	0	0.1	0.001	PTM (Ubiquitylation)
ccr9_human	172	4.49x49	TM4	I => M	missense	8.247e-06	1	121258	0	0.0	0.259
ccr9_human	174	4.51x51	TM4	V => I	missense	8.247e-06	1	121250	0	0.12	0.078	PTM (Phosphorylation)
ccr9_human	175	4.52x52	TM4	L => S	missense	4.125e-05	5	121218	0	0.01	0.099	PTM (Phosphorylation)
ccr9_human	189		ECL2	I => T	missense	1.648e-05	2	121360	0	0.42	0.001
ccr9_human	194		ECL2	G => S	missense	4.119e-05	5	121386	0	0.28	0.017	PTM (Phosphorylation)
ccr9_human	200	45.52x52	ECL2	M => V	missense	8.237e-06	1	121400	0	0.08	0.031	PTM (Phosphorylation)
ccr9_human	200	45.52x52	ECL2	M => I	missense	2.471e-05	3	121400	0	0.28	0.093	PTM (Phosphorylation)
ccr9_human	204		ECL2	S => G	missense	8.237e-06	1	121402	0	0.19	0.002	SodiumPocket MicroSwitch PTM (Ubiquitylation)
ccr9_human	205		ECL2	D => N	missense	4.942e-05	6	121402	0	1.0	0.002	PTM (Phosphorylation)
ccr9_human	210	5.34x35	TM5	L => M	missense	1.647e-05	2	121404	0	0.16	0.739
ccr9_human	218	5.42x43	TM5	K => N	missense	8.237e-06	1	121404	0	0.07	0.078	PTM (Phosphorylation)
ccr9_human	225	5.49x49	TM5	L => F	missense	8.237e-06	1	121402	0	0.05	0.919	PTM (Phosphorylation)
ccr9_human	228	5.52x52	TM5	V => L	missense	8.237e-06	1	121402	0	1.0	0.007	PTM (Phosphorylation)
ccr9_human	228	5.52x52	TM5	V => M	missense	4.119e-05	5	121402	0	0.19	0.045	PTM (Phosphorylation)
ccr9_human	231	5.55x55	TM5	A => T	missense	0.002735	332	121404	1	0.02	0.315	PTM (Acetylation)
ccr9_human	234	5.58x58	TM5	Y => C	missense	8.237e-06	1	121406	0	0.0	1.0	PTM (Phosphorylation)
ccr9_human	235	5.59x59	TM5	T => A	missense	8.237e-06	1	121406	0	0.8	0.006	PTM (Ubiquitylation)
ccr9_human	235	5.59x59	TM5	T => N	missense	8.237e-06	1	121402	0	0.01	0.371	PTM (Ubiquitylation)
ccr9_human	240	5.64x64	TM5	T => A	missense	1.647e-05	2	121400	0	0.06	0.362	PTM (Phosphorylation) GP (contact)
ccr9_human	243	5.67x67	TM5	Q => R	missense	1.647e-05	2	121404	0	0.09	0.012	PTM (Phosphorylation) GP (contact)
ccr9_human	245		ICL3	K => E	missense	8.236e-06	1	121412	0	0.0	0.61	PTM (Phosphorylation)
ccr9_human	250	6.31x31	TM6	H => D	missense	8.237e-06	1	121410	0	0.0	0.968	PTM (Phosphorylation)
ccr9_human	256	6.37x37	TM6	T => I	missense	0.0001894	23	121412	0	1.0	0.006	PTM (Phosphorylation) GP (contact)
ccr9_human	256	6.37x37	TM6	T => N	missense	8.236e-06	1	121412	0	0.0	0.808	PTM (Phosphorylation) GP (contact)
ccr9_human	262	6.43x43	TM6	V => L	missense	8.236e-06	1	121412	0	0.08	0.275	PTM (Phosphorylation)
ccr9_human	262	6.43x43	TM6	V => I	missense	1.647e-05	2	121412	0	0.06	0.532	PTM (Phosphorylation)
ccr9_human	265	6.46x46	TM6	L => V	missense	4.118e-05	5	121412	0	0.1	0.077
ccr9_human	271	6.52x52	TM6	N => D	missense	1.647e-05	2	121412	0	0.0	0.96	PTM (Acetylation)
ccr9_human	278	6.59x59	TM6	T => I	missense	8.236e-06	1	121412	0	0.07	0.035
ccr9_human	279	6.60x60	TM6	I => V	missense	1.647e-05	2	121410	0	0.23	0.008	PTM (Methylation)
ccr9_human	281	6.62x62	TM6	A => V	missense	1.647e-05	2	121410	0	0.01	0.643	PTM (Phosphorylation)
ccr9_human	284	6.65x65	TM6	M => V	missense	0.003525	428	121412	2	0.64	0.005
ccr9_human	284	6.65x65	TM6	M => T	missense	8.236e-06	1	121412	0	0.82	0.002
ccr9_human	286		ECL3	I => L	missense	8.237e-06	1	121410	0	0.19	0.02	PTM (Methylation)
ccr9_human	288	7.24x23	TM7	N => S	missense	8.237e-06	1	121406	0	0.89	0.007	PTM (Phosphorylation)
ccr9_human	291	7.27x26	TM7	V => I	missense	2.471e-05	3	121406	0	0.58	0.002	PTM (Phosphorylation)
ccr9_human	298	7.34x33	TM7	C => F	missense	8.237e-06	1	121402	0	0.05	0.148	PTM (Phosphorylation)
ccr9_human	302	7.38x37	TM7	T => A	missense	1.647e-05	2	121400	0	0.2	0.836	PTM (Phosphorylation)
ccr9_human	304	7.40x39	TM7	T => I	missense	8.237e-06	1	121402	0	0.07	0.043	PTM (Phosphorylation)
ccr9_human	311	7.47x47	TM7	C => F	missense	8.237e-06	1	121404	0	0.0	1.0	PTM (Phosphorylation)
ccr9_human	317	7.53x53	TM7	Y => C	missense	8.237e-06	1	121398	0	0.0	1.0	PTM (Phosphorylation)
ccr9_human	321	8.47x47	H8	G => V	missense	3.295e-05	4	121388	0	0.0	0.998	PTM (Phosphorylation) GP (contact)
ccr9_human	325	8.51x51	H8	R => C	missense	2.471e-05	3	121388	0	0.0	1.0	PTM (Phosphorylation) GP (contact)
ccr9_human	326	8.52x52	H8	R => W	missense	8.238e-06	1	121388	0	0.0	0.952	PTM (Phosphorylation)
ccr9_human	326	8.52x52	H8	R => Q	missense	1.648e-05	2	121386	0	0.69	0.044	PTM (Phosphorylation)
ccr9_human	336	8.62x62	H8	G => D	missense	0.0001401	17	121352	0	0.01	0.938	PTM (Phosphorylation)
ccr9_human	337	8.63x63	H8	C => Y	missense	8.242e-06	1	121328	0	0.0	0.989	PTM (Phosphorylation)
ccr9_human	342		C-term	Q => R	missense	8.249e-06	1	121230	0	0.2	0.002	PTM (Phosphorylation)
ccr9_human	343		C-term	W => R	missense	8.249e-06	1	121222	0	0.22	0.258	PTM (Phosphorylation)
ccr9_human	345		C-term	S => L	missense	1.651e-05	2	121120	0	0.32	0.006	PTM (Phosphorylation)
ccr9_human	346		C-term	F => L	missense	2.479e-05	3	121010	0	0.38	0.004	PTM (Phosphorylation)
ccr9_human	350		C-term	E => K	missense	8.295e-06	1	120556	0	0.39	0.04	PTM (Phosphorylation)
ccr9_human	357		C-term	S => P	missense	1.686e-05	2	118610	0	0.02	0.996	PTM (Phosphorylation)
ccr9_human	358		C-term	M => I	missense	8.464e-06	1	118146	0	0.17	0.004	SodiumPocket MicroSwitch PTM (Phosphorylation)
ccr9_human	361		C-term	E => K	missense	1.704e-05	2	117404	0	0.07	0.213	PTM (Palmitoylation)
ccr9_human	363		C-term	T => N	missense	8.594e-06	1	116366	0	0.01	0.579	PTM (Phosphorylation)
ccr9_human	367		C-term	L => V	missense	8.71e-06	1	114810	0	0.0	0.931	PTM (Phosphorylation)
ccr9_human	26		N-term	E => Ter	stop gained	8.252e-06	1	121186	0	None	None	PTM (Sulfation)
ccr9_human	153	34.52x52	ICL2	R => Ter	stop gained	8.238e-06	1	121382	0	None	None	PTM (Phosphorylation) GP (contact)
ccr9_human	163	4.40x40	TM4	L => CysfsTer48	frameshift	8.243e-06	1	121316	0	None	None	PTM (Phosphorylation)
ccr9_human	191		ECL2	E => GlyfsTer20	frameshift	3.296e-05	4	121372	0	None	None	PTM (N-linked Glycosylation)
ccr9_human	282	6.63x63	TM6	Y => Ter	stop gained	8.237e-06	1	121406	0	None	None	PTM (Ubiquitylation)
ccr9_human	293	7.29x28	TM7	T => ProfsTer20	frameshift	8.237e-06	1	121410	0	None	None	PTM (Retinal protein)
ccrl2_human	4		N-term	Y => C	missense	0.02773	998	35992	16	0.04	0.969	PTM (Phosphorylation)
ccrl2_human	8		N-term	P => R	missense	2.224e-05	1	44970	0	0.0	1.0	PTM (Phosphorylation)
ccrl2_human	10		N-term	D => G	missense	4.133e-05	2	48386	0	0.02	0.455	PTM (Phosphorylation)
ccrl2_human	12		N-term	Y => H	missense	1.958e-05	1	51076	0	0.0	1.0	PTM (Phosphorylation)
ccrl2_human	12		N-term	Y => C	missense	5.82e-05	3	51546	0	0.0	1.0	PTM (Phosphorylation)
ccrl2_human	16		N-term	I => T	missense	0.0001025	6	58556	0	0.0	0.999	PTM (Phosphorylation)
ccrl2_human	18		N-term	G => D	missense	1.621e-05	1	61678	0	1.0	0.016	PTM (Phosphorylation)
ccrl2_human	22		N-term	S => G	missense	1.476e-05	1	67758	0	0.54	0.015	PTM (Sulfation)
ccrl2_human	23		N-term	D => N	missense	0.000685	48	70068	0	0.42	0.009
ccrl2_human	24		N-term	E => K	missense	1.378e-05	1	72586	0	0.34	0.064
ccrl2_human	26		N-term	E => D	missense	1.263e-05	1	79206	0	0.26	0.047	PTM (Sulfation)
ccrl2_human	28		N-term	C => R	missense	1.209e-05	1	82682	0	0.05	0.61	PTM (Sulfation)
ccrl2_human	29		N-term	D => V	missense	1.181e-05	1	84676	0	0.14	0.025	PTM (Phosphorylation)
ccrl2_human	30	1.24x24	TM1	K => R	missense	1.155e-05	1	86606	0	0.47	0.002	PTM (N-linked Glycosylation)
ccrl2_human	33	1.27x27	TM1	A => T	missense	2.161e-05	2	92534	0	0.66	0.004	PTM (Phosphorylation)
ccrl2_human	33	1.27x27	TM1	A => G	missense	0.0008855	83	93734	0	0.36	0.004	PTM (Phosphorylation)
ccrl2_human	33	1.27x27	TM1	A => D	missense	2.134e-05	2	93734	0	0.34	0.009	PTM (Phosphorylation)
ccrl2_human	42	1.36x36	TM1	P => Q	missense	8.926e-06	1	112036	0	0.23	0.447	PTM (Phosphorylation)
ccrl2_human	48	1.42x42	TM1	V => A	missense	4.266e-05	5	117204	0	0.0	0.949	PTM (Phosphorylation)
ccrl2_human	50	1.44x44	TM1	V => L	missense	8.492e-06	1	117762	0	0.71	0.007	PTM (Phosphorylation)
ccrl2_human	52	1.46x46	TM1	G => S	missense	8.431e-06	1	118610	0	0.03	0.995	PTM (Phosphorylation)
ccrl2_human	53	1.47x47	TM1	V => I	missense	8.41e-06	1	118902	0	0.01	0.048	PTM (Phosphorylation)
ccrl2_human	53	1.47x47	TM1	V => A	missense	5.043e-05	6	118978	0	0.0	0.048	PTM (Phosphorylation)
ccrl2_human	57	1.51x51	TM1	L => R	missense	8.359e-06	1	119626	0	0.04	0.763	PTM (Phosphorylation)
ccrl2_human	61	1.55x55	TM1	L => F	missense	0.0008417	101	119990	2	0.57	0.137	PTM (Acetylation)
ccrl2_human	62	1.56x56	TM1	I => T	missense	4.163e-05	5	120096	0	0.0	0.129	PTM (Phosphorylation)
ccrl2_human	64	1.58x58	TM1	V => I	missense	2.496e-05	3	120196	0	0.25	0.249	PTM (Proteolytic Cleavage)
ccrl2_human	68	12.49x49	ICL1	G => R	missense	8.302e-06	1	120448	0	0.17	0.811	PTM (Phosphorylation)
ccrl2_human	71	2.37x37	TM2	R => C	missense	8.294e-06	1	120576	0	0.09	0.809	PTM (Methylation)
ccrl2_human	71	2.37x37	TM2	R => S	missense	8.294e-06	1	120576	0	0.12	0.139	PTM (Methylation)
ccrl2_human	71	2.37x37	TM2	R => H	missense	8.292e-06	1	120598	0	1.0	0.003	PTM (Methylation)
ccrl2_human	72	2.38x38	TM2	V => M	missense	6.633e-05	8	120614	0	0.12	0.336	PTM (Proteolytic Cleavage)
ccrl2_human	72	2.38x38	TM2	V => L	missense	1.658e-05	2	120614	0	0.2	0.042	PTM (Proteolytic Cleavage)
ccrl2_human	72	2.38x38	TM2	V => L	missense	8.291e-06	1	120614	0	0.2	0.042	PTM (Proteolytic Cleavage)
ccrl2_human	75	2.41x41	TM2	I => T	missense	8.286e-06	1	120686	0	0.08	0.677	PTM (Proteolytic Cleavage)
ccrl2_human	76	2.42x42	TM2	Y => C	missense	1.657e-05	2	120700	0	0.06	0.395	PTM (Proteolytic Cleavage)
ccrl2_human	81	2.47x47	TM2	A => T	missense	3.313e-05	4	120734	0	0.08	0.888	PTM (Phosphorylation)
ccrl2_human	90	2.56x56	TM2	T => N	missense	8.281e-06	1	120758	0	0.09	0.632	PTM (Disulfide bond)
ccrl2_human	98		ECL1	G => E	missense	0.01256	1517	120766	17	0.06	0.403	PTM (Disulfide bond)
ccrl2_human	99		ECL1	G => D	missense	5.796e-05	7	120766	0	0.14	0.372	PTM (N-linked Glycosylation)
ccrl2_human	100		ECL1	D => N	missense	3.312e-05	4	120766	0	0.76	0.011
ccrl2_human	100		ECL1	D => G	missense	8.28e-06	1	120768	0	0.36	0.01
ccrl2_human	101		ECL1	P => H	missense	8.28e-06	1	120766	0	0.0	0.962	PTM (Phosphorylation)
ccrl2_human	102		ECL1	M => V	missense	8.28e-06	1	120766	0	0.69	0.016
ccrl2_human	106	3.28x28	TM3	L => F	missense	8.28e-06	1	120768	0	0.12	0.394
ccrl2_human	107	3.29x29	TM3	I => T	missense	9.108e-05	11	120770	0	0.12	0.08	PTM (Phosphorylation)
ccrl2_human	109	3.31x31	TM3	L => Q	missense	5.796e-05	7	120768	0	0.0	0.994
ccrl2_human	112	3.34x34	TM3	V => M	missense	5.796e-05	7	120768	0	0.06	0.356	PTM (Phosphorylation)
ccrl2_human	113	3.35x35	TM3	G => D	missense	8.28e-06	1	120770	0	0.0	0.997	PTM (Phosphorylation)
ccrl2_human	116	3.38x38	TM3	S => R	missense	8.28e-06	1	120770	0	0.02	0.992
ccrl2_human	117	3.39x39	TM3	E => D	missense	8.28e-06	1	120770	0	0.03	0.982	PTM (Phosphorylation)
ccrl2_human	118	3.40x40	TM3	T => I	missense	1.656e-05	2	120770	0	0.07	0.077	PTM (Phosphorylation)
ccrl2_human	121	3.43x43	TM3	N => S	missense	8.28e-05	10	120770	0	0.39	0.314	PTM (Phosphorylation)
ccrl2_human	122	3.44x44	TM3	C => R	missense	8.28e-06	1	120770	0	0.01	0.362	PTM (Phosphorylation)
ccrl2_human	124	3.46x46	TM3	L => R	missense	8.28e-06	1	120770	0	0.0	1.0	SodiumPocket MicroSwitch PTM (Phosphorylation)
ccrl2_human	125	3.47x47	TM3	T => A	missense	8.28e-06	1	120768	0	0.25	0.04	PTM (Phosphorylation)
ccrl2_human	126	3.48x48	TM3	V => A	missense	1.656e-05	2	120770	0	0.07	0.227	PTM (Phosphorylation)
ccrl2_human	128	3.50x50	TM3	R => K	missense	8.28e-06	1	120768	0	0.46	0.245	PTM (Phosphorylation) GP (contact)
ccrl2_human	128	3.50x50	TM3	R => S	missense	1.656e-05	2	120770	0	0.45	0.114	PTM (Phosphorylation) GP (contact)
ccrl2_human	129	3.51x51	TM3	Y => H	missense	1.656e-05	2	120764	0	0.08	0.983	PTM (Phosphorylation)
ccrl2_human	129	3.51x51	TM3	Y => S	missense	8.28e-06	1	120768	0	0.21	0.332	PTM (Phosphorylation)
ccrl2_human	132	3.54x54	TM3	F => L	missense	8.28e-06	1	120768	0	0.45	0.366	PTM (Ubiquitylation) GP (contact)
ccrl2_human	140	34.55x55	ICL2	S => L	missense	2.484e-05	3	120766	0	0.62	0.015	PTM (Phosphorylation) GP (contact)
ccrl2_human	143	34.58x58	ICL2	R => M	missense	8.28e-06	1	120766	0	0.02	0.625	PTM (Phosphorylation)
ccrl2_human	144	4.38x38	TM4	R => W	missense	1.656e-05	2	120766	0	0.01	0.799	PTM (Acetylation)
ccrl2_human	144	4.38x38	TM4	R => K	missense	0.000149	18	120768	0	0.79	0.002	PTM (Acetylation)
ccrl2_human	145	4.39x39	TM4	V => L	missense	8.28e-06	1	120768	0	0.04	0.63	PTM (Phosphorylation)
ccrl2_human	156	4.50x50	TM4	W => C	missense	8.281e-06	1	120762	0	0.02	0.907	PTM (Phosphorylation)
ccrl2_human	157	4.51x51	TM4	V => I	missense	8.28e-06	1	120766	0	0.81	0.026	PTM (Phosphorylation)
ccrl2_human	159	4.53x53	TM4	A => D	missense	8.28e-06	1	120766	0	0.0	0.991	PTM (Phosphorylation)
ccrl2_human	162	4.56x56	TM4	A => D	missense	2.484e-05	3	120762	0	0.0	0.609	PTM (Phosphorylation)
ccrl2_human	167	4.61x62	TM4	F => Y	missense	0.38	45870	120718	9371	1.0	0.466	PTM (Ubiquitylation)
ccrl2_human	168	4.62x63	TM4	V => M	missense	0.1083	13073	120760	862	0.19	0.069	PTM (Phosphorylation)
ccrl2_human	169	4.63x64	TM4	V => A	missense	6.624e-05	8	120768	0	0.06	0.011
ccrl2_human	172		ECL2	P => T	missense	2.484e-05	3	120766	0	0.15	0.922
ccrl2_human	174		ECL2	M => K	missense	8.28e-06	1	120768	0	1.0	0.043	PTM (Phosphorylation)
ccrl2_human	180		ECL2	K => T	missense	3.312e-05	4	120764	0	0.4	0.019
ccrl2_human	187		ECL2	P => S	missense	8.281e-06	1	120762	0	0.23	0.03	PTM (Phosphorylation)
ccrl2_human	188		ECL2	F => I	missense	2.484e-05	3	120762	0	0.0	0.953	PTM (Phosphorylation)
ccrl2_human	191		ECL2	A => S	missense	8.281e-06	1	120762	0	0.13	0.248	PTM (N-linked Glycosylation)
ccrl2_human	194	5.32x33	TM5	T => A	missense	8.28e-06	1	120766	0	0.22	0.161	PTM (Phosphorylation)
ccrl2_human	194	5.32x33	TM5	T => I	missense	1.656e-05	2	120760	0	0.04	0.951	PTM (Phosphorylation)
ccrl2_human	198	5.36x37	TM5	H => N	missense	1.656e-05	2	120760	0	0.21	0.425	PTM (N-linked Glycosylation)
ccrl2_human	199	5.37x38	TM5	F => L	missense	0.0002153	26	120758	0	0.1	0.134	PTM (Phosphorylation)
ccrl2_human	204	5.42x43	TM5	M => T	missense	8.281e-06	1	120756	0	0.13	0.39	SodiumPocket MicroSwitch PTM (Ubiquitylation)
ccrl2_human	206	5.44x45	TM5	I => V	missense	8.282e-06	1	120746	0	0.33	0.022	PTM (Phosphorylation)
ccrl2_human	207	5.45x46	TM5	S => L	missense	0.0004307	52	120744	0	1.0	0.0	SodiumPocket MicroSwitch
ccrl2_human	212	5.50x50	TM5	P => S	missense	3.313e-05	4	120732	0	0.0	1.0	PTM (Phosphorylation)
ccrl2_human	218	5.56x56	TM5	F => L	missense	8.283e-06	1	120724	0	0.11	0.176	PTM (Phosphorylation)
ccrl2_human	220	5.58x58	TM5	Y => C	missense	1.657e-05	2	120712	0	0.26	0.058	PTM (Phosphorylation)
ccrl2_human	222	5.60x60	TM5	Q => H	missense	4.971e-05	6	120710	0	0.32	0.143	PTM (Phosphorylation)
ccrl2_human	235	6.32x32	TM6	S => T	missense	8.283e-06	1	120722	0	0.17	0.215	PTM (Ubiquitylation) GP (contact)
ccrl2_human	235	6.32x32	TM6	S => R	missense	8.283e-06	1	120728	0	0.13	0.011	PTM (Ubiquitylation) GP (contact)
ccrl2_human	238	6.35x35	TM6	K => R	missense	6.626e-05	8	120734	0	0.35	0.217	PTM (Phosphorylation)
ccrl2_human	239	6.36x36	TM6	L => V	missense	1.657e-05	2	120734	0	0.01	0.992	PTM (Phosphorylation) GP (contact)
ccrl2_human	242	6.39x39	TM6	A => S	missense	8.283e-06	1	120732	0	0.06	0.745	PTM (Phosphorylation)
ccrl2_human	243	6.40x40	TM6	I => V	missense	0.09433	11389	120738	798	0.27	0.097	PTM (Phosphorylation) GP (contact)
ccrl2_human	244	6.41x41	TM6	M => I	missense	1.656e-05	2	120742	0	0.03	0.259	PTM (Phosphorylation)
ccrl2_human	245	6.42x42	TM6	V => A	missense	8.282e-06	1	120744	0	1.0	0.03	PTM (Phosphorylation)
ccrl2_human	251	6.48x48	TM6	W => R	missense	8.281e-06	1	120760	0	0.0	1.0	PTM (Phosphorylation)
ccrl2_human	252	6.49x49	TM6	A => V	missense	7.453e-05	9	120758	0	0.01	0.885	PTM (Phosphorylation)
ccrl2_human	253	6.50x50	TM6	P => L	missense	8.281e-06	1	120764	0	0.0	1.0	PTM (Phosphorylation)
ccrl2_human	254	6.51x51	TM6	Y => F	missense	8.281e-06	1	120764	0	0.07	0.889	PTM (Acetylation)
ccrl2_human	255	6.52x52	TM6	N => D	missense	1.656e-05	2	120766	0	0.02	0.987	PTM (Phosphorylation)
ccrl2_human	255	6.52x52	TM6	N => S	missense	8.28e-06	1	120766	0	0.02	0.965	PTM (Phosphorylation)
ccrl2_human	256	6.53x53	TM6	I => V	missense	1.656e-05	2	120768	0	0.75	0.027	PTM (Phosphorylation)
ccrl2_human	261	6.58x58	TM6	S => Y	missense	6.624e-05	8	120768	0	0.08	0.839	PTM (Phosphorylation)
ccrl2_human	262	6.59x59	TM6	T => I	missense	8.28e-06	1	120768	0	0.01	0.845	PTM (Phosphorylation)
ccrl2_human	266	6.63x63	TM6	H => R	missense	8.28e-06	1	120766	0	0.29	0.026	PTM (Phosphorylation)
ccrl2_human	282	7.35x34	TM7	V => I	missense	8.28e-06	1	120778	0	0.28	0.138	PTM (Ubiquitylation)
ccrl2_human	284	7.37x36	TM7	I => V	missense	3.312e-05	4	120780	0	1.0	0.01
ccrl2_human	287	7.40x39	TM7	L => I	missense	0.0006623	80	120784	0	1.0	0.018	PTM (Phosphorylation)
ccrl2_human	287	7.40x39	TM7	L => P	missense	8.279e-06	1	120784	0	0.0	0.88	PTM (Phosphorylation)
ccrl2_human	289	7.42x41	TM7	A => T	missense	2.484e-05	3	120788	0	0.0	0.999	PTM (Phosphorylation)
ccrl2_human	291	7.44x43	TM7	T => I	missense	3.312e-05	4	120786	0	0.09	0.772	PTM (Phosphorylation)
ccrl2_human	296	7.49x49	TM7	N => S	missense	1.656e-05	2	120778	0	0.06	0.896	PTM (Retinal protein)
ccrl2_human	296	7.49x49	TM7	N => T	missense	8.28e-06	1	120778	0	0.09	0.896	PTM (Retinal protein)
ccrl2_human	298	7.51x51	TM7	L => F	missense	8.28e-06	1	120780	0	0.05	0.617	PTM (Phosphorylation)
ccrl2_human	301	7.54x54	TM7	A => V	missense	0.0001242	15	120778	0	1.0	0.0	PTM (Phosphorylation)
ccrl2_human	305	8.48x48	H8	G => W	missense	2.484e-05	3	120782	0	0.0	0.929	PTM (Phosphorylation) GP (contact)
ccrl2_human	306	8.49x49	H8	T => P	missense	8.279e-06	1	120782	0	0.24	0.023	PTM (Phosphorylation) GP (contact)
ccrl2_human	313	8.56x56	H8	R => S	missense	2.484e-05	3	120776	0	0.88	0.054	PTM (Phosphorylation)
ccrl2_human	313	8.56x56	H8	R => H	missense	4.14e-05	5	120772	0	0.97	0.005	PTM (Phosphorylation)
ccrl2_human	316	8.59x59	H8	H => L	missense	8.28e-06	1	120770	0	0.65	0.007	PTM (Phosphorylation)
ccrl2_human	318		C-term	R => C	missense	8.281e-06	1	120760	0	0.35	0.002	PTM (Phosphorylation)
ccrl2_human	318		C-term	R => H	missense	8.281e-06	1	120760	0	0.21	0.011	PTM (Phosphorylation)
ccrl2_human	319		C-term	S => G	missense	8.281e-06	1	120760	0	0.58	0.002	PTM (Phosphorylation)
ccrl2_human	323		C-term	L => H	missense	8.283e-06	1	120736	0	0.54	0.015	PTM (Phosphorylation)
ccrl2_human	324		C-term	Q => R	missense	8.283e-06	1	120722	0	0.28	0.079	PTM (Phosphorylation)
ccrl2_human	325		C-term	P => T	missense	8.284e-06	1	120720	0	0.05	0.284	PTM (Phosphorylation)
ccrl2_human	327		C-term	G => R	missense	8.286e-06	1	120680	0	0.48	0.003	PTM (Phosphorylation)
ccrl2_human	329		C-term	S => P	missense	8.29e-06	1	120630	0	0.39	0.003	PTM (Phosphorylation)
ccrl2_human	333		C-term	T => I	missense	8.315e-06	1	120264	0	0.01	0.299	PTM (Phosphorylation)
ccrl2_human	338		C-term	P => T	missense	8.372e-06	1	119444	0	0.44	0.025	PTM (Dephosphorylation)
ccrl2_human	338		C-term	P => R	missense	4.186e-05	5	119454	0	0.41	0.003	PTM (Dephosphorylation)
ccrl2_human	339		C-term	D => G	missense	0.0001679	20	119126	0	0.14	0.027	PTM (Phosphorylation)
ccrl2_human	343		C-term	E => K	missense	1.692e-05	2	118226	0	0.46	0.018	PTM (Phosphorylation)
ccrl2_human	343		C-term	E => D	missense	8.484e-06	1	117874	0	0.24	0.01	PTM (Phosphorylation)
ccrl2_human	46	1.40x40	TM1	S => ArgfsTer17	frameshift	2.092e-05	2	95592	0	None	None	PTM (O-GalNAc)
ccrl2_human	97	2.63x63	TM2	A => ValfsTer19	frameshift	8.281e-06	1	120754	0	None	None
ccrl2_human	141	34.56x56	ICL2	A => PhefsTer3	frameshift	8.28e-06	1	120770	0	None	None	PTM (Phosphorylation) GP (contact)
ccrl2_human	157	4.51x51	TM4	V => GlyfsTer13	frameshift	8.28e-06	1	120768	0	None	None	PTM (Phosphorylation)
ccrl2_human	190		ECL2	P => Ter	stop gained	1.656e-05	2	120768	0	None	None
ccrl2_human	208	5.46x461	TM5	V => Ter	stop gained	4.14e-05	5	120764	0	None	None	PTM (Phosphorylation)
ccrl2_human	208	5.46x461	TM5	V => Ter	stop gained	4.14e-05	5	120768	0	None	None	PTM (Phosphorylation)
cml1_human	371		C-term	G => D	missense	3.468e-05	4	115326	0	nan	0.024	PTM (Phosphorylation)
cml1_human	371		C-term	G => S	missense	0.0003546	41	115628	0	1.0	0.001	PTM (Phosphorylation)
cml1_human	365		C-term	M => V	missense	3.365e-05	4	118874	0	1.0	0.0	PTM (Phosphorylation)
cml1_human	363		C-term	T => I	missense	3.35e-05	4	119418	0	0.2	0.001	PTM (Phosphorylation)
cml1_human	361		C-term	E => V	missense	3.335e-05	4	119946	0	0.0	0.372	PTM (Palmitoylation)
cml1_human	359		C-term	M => T	missense	8.312e-06	1	120302	0	0.14	0.028	PTM (Phosphorylation)
cml1_human	358		C-term	S => P	missense	1.66e-05	2	120474	0	0.0	0.392	SodiumPocket MicroSwitch PTM (Phosphorylation)
cml1_human	355		C-term	K => N	missense	8.292e-06	1	120600	0	0.06	0.011	PTM (Phosphorylation)
cml1_human	354		C-term	T => A	missense	8.286e-06	1	120680	0	0.01	0.411	SodiumPocket MicroSwitch PTM (Phosphorylation)
cml1_human	352		C-term	S => G	missense	8.284e-06	1	120708	0	0.03	0.026	PTM (Phosphorylation)
cml1_human	350		C-term	H => R	missense	2.485e-05	3	120720	0	0.26	0.015	PTM (Phosphorylation)
cml1_human	345		C-term	S => F	missense	3.313e-05	4	120736	0	0.0	0.347	PTM (Phosphorylation)
cml1_human	343		C-term	G => V	missense	8.283e-06	1	120736	0	0.26	0.003	PTM (Phosphorylation)
cml1_human	333	8.60x60	H8	R => H	missense	6.625e-05	8	120758	0	0.08	0.943	PTM (Phosphorylation)
cml1_human	333	8.60x60	H8	R => C	missense	1.656e-05	2	120758	0	0.07	0.943	PTM (Phosphorylation)
cml1_human	319	7.56x56	TM7	M => T	missense	8.281e-06	1	120752	0	0.0	0.196	PTM (Phosphorylation) GP (contact)
cml1_human	311	7.48x48	TM7	M => V	missense	8.282e-06	1	120744	0	0.01	0.023	PTM (Phosphorylation)
cml1_human	306	7.43x42	TM7	I => V	missense	9.111e-05	11	120736	0	0.31	0.036	PTM (Phosphorylation)
cml1_human	302	7.39x38	TM7	T => S	missense	8.283e-06	1	120732	0	0.37	0.062	PTM (Phosphorylation)
cml1_human	300	7.37x36	TM7	L => V	missense	3.313e-05	4	120728	0	0.01	0.206
cml1_human	291	7.28x27	TM7	G => D	missense	8.286e-06	1	120688	0	0.7	0.014	PTM (Phosphorylation)
cml1_human	290		ECL3	P => T	missense	8.283e-06	1	120724	0	0.16	0.103	PTM (Phosphorylation)
cml1_human	289		ECL3	M => I	missense	0.002427	293	120718	5	0.57	0.002	PTM (Phosphorylation)
cml1_human	289		ECL3	M => V	missense	8.284e-06	1	120714	0	1.0	0.002	PTM (Phosphorylation)
cml1_human	283	6.58x58	TM6	E => G	missense	8.285e-06	1	120696	0	0.01	0.81	PTM (Phosphorylation)
cml1_human	271	6.46x46	TM6	L => V	missense	8.286e-06	1	120690	0	0.05	0.17	PTM (Acetylation)
cml1_human	270	6.45x45	TM6	F => L	missense	8.285e-06	1	120696	0	0.0	1.0	PTM (Phosphorylation)
cml1_human	256	6.31x31	TM6	K => N	missense	8.283e-06	1	120734	0	0.19	0.068	PTM (Phosphorylation)
cml1_human	255	6.30x30	TM6	T => A	missense	8.282e-06	1	120738	0	0.02	0.141	PTM (Phosphorylation)
cml1_human	251		ICL3	R => H	missense	0.0001077	13	120736	0	0.2	0.179	PTM (Phosphorylation)
cml1_human	251		ICL3	R => L	missense	1.657e-05	2	120736	0	0.02	0.947	PTM (Phosphorylation)
cml1_human	251		ICL3	R => C	missense	6.626e-05	8	120740	0	0.0	0.993	PTM (Phosphorylation)
cml1_human	249	5.67x67	TM5	R => H	missense	2.485e-05	3	120746	0	0.0	0.455	PTM (Phosphorylation) GP (contact)
cml1_human	249	5.67x67	TM5	R => C	missense	0.0001077	13	120746	0	0.0	0.973	PTM (Phosphorylation) GP (contact)
cml1_human	244	5.62x62	TM5	V => M	missense	4.969e-05	6	120752	0	0.03	0.657	PTM (Phosphorylation)
cml1_human	238	5.56x56	TM5	A => T	missense	8.282e-06	1	120746	0	0.32	0.042	PTM (Phosphorylation)
cml1_human	232	5.50x50	TM5	P => L	missense	8.282e-06	1	120738	0	0.0	1.0	PTM (Phosphorylation)
cml1_human	230	5.48x48	TM5	L => Q	missense	8.282e-06	1	120744	0	0.0	0.987	PTM (Ubiquitylation)
cml1_human	230	5.48x48	TM5	L => P	missense	8.282e-06	1	120744	0	0.0	0.987	PTM (Ubiquitylation)
cml1_human	225	5.43x44	TM5	F => L	missense	8.282e-06	1	120742	0	0.02	0.539	PTM (Phosphorylation)
cml1_human	224	5.42x43	TM5	R => H	missense	3.313e-05	4	120734	0	0.02	0.893	PTM (Methylation)
cml1_human	224	5.42x43	TM5	R => C	missense	3.313e-05	4	120742	0	0.0	0.951	PTM (Methylation)
cml1_human	223	5.41x42	TM5	T => A	missense	8.282e-06	1	120744	0	0.07	0.517	PTM (Phosphorylation)
cml1_human	217	5.35x36	TM5	H => Q	missense	9.939e-05	12	120740	0	0.09	0.158	PTM (Phosphorylation)
cml1_human	216	5.34x35	TM5	R => W	missense	3.313e-05	4	120742	0	0.07	0.052	PTM (Phosphorylation)
cml1_human	215		ECL2	S => R	missense	0.0001491	18	120730	0	0.39	0.005	SodiumPocket MicroSwitch PTM (Phosphorylation)
cml1_human	214		ECL2	Y => C	missense	4.141e-05	5	120744	0	0.15	0.276	PTM (Phosphorylation)
cml1_human	213		ECL2	G => E	missense	8.283e-06	1	120728	0	0.16	0.315	PTM (Phosphorylation)
cml1_human	210		ECL2	D => E	missense	8.282e-06	1	120740	0	1.0	0.005
cml1_human	207		ECL2	S => F	missense	8.282e-06	1	120748	0	0.06	0.004	SodiumPocket MicroSwitch
cml1_human	207		ECL2	S => Y	missense	1.656e-05	2	120748	0	0.04	0.106	SodiumPocket MicroSwitch
cml1_human	206		ECL2	H => R	missense	8.282e-06	1	120740	0	0.4	0.013	PTM (Phosphorylation)
cml1_human	203		ECL2	W => R	missense	3.313e-05	4	120730	0	0.39	0.001	PTM (Acetylation)
cml1_human	202		ECL2	S => L	missense	2.485e-05	3	120724	0	0.33	0.005	PTM (Phosphorylation)
cml1_human	200		ECL2	S => P	missense	8.282e-06	1	120742	0	0.21	0.013	PTM (Phosphorylation)
cml1_human	198		ECL2	P => S	missense	8.283e-06	1	120732	0	0.64	0.009	PTM (N-linked Glycosylation)
cml1_human	194		ECL2	S => R	missense	3.313e-05	4	120752	0	0.01	0.152	PTM (Phosphorylation)
cml1_human	194		ECL2	S => I	missense	8.282e-06	1	120742	0	0.01	0.232	PTM (Phosphorylation)
cml1_human	193		ECL2	F => V	missense	9.938e-05	12	120750	0	0.0	0.549	PTM (Phosphorylation)
cml1_human	191	45.52x52	ECL2	N => I	missense	1.656e-05	2	120746	0	0.0	0.781	PTM (N-linked Glycosylation)
cml1_human	188		ECL2	S => P	missense	8.281e-06	1	120758	0	0.24	0.56	PTM (Phosphorylation)
cml1_human	187		ECL2	I => M	missense	0.000265	32	120760	0	0.05	0.217	PTM (Phosphorylation)
cml1_human	179		ECL2	D => Y	missense	8.281e-06	1	120756	0	0.01	0.928	PTM (Disulfide bond)
cml1_human	178	4.64x65	TM4	R => Q	missense	8.281e-06	1	120752	0	0.0	0.936	PTM (Phosphorylation)
cml1_human	178	4.64x65	TM4	R => W	missense	4.969e-05	6	120758	0	0.0	0.48	PTM (Phosphorylation)
cml1_human	175	4.61x62	TM4	L => V	missense	1.656e-05	2	120762	0	0.03	0.378	PTM (Phosphorylation)
cml1_human	173	4.59x60	TM4	P => S	missense	8.281e-06	1	120758	0	0.0	0.976	PTM (Disulfide bond)
cml1_human	170	4.56x56	TM4	L => F	missense	4.141e-05	5	120754	0	0.02	0.633	PTM (Phosphorylation)
cml1_human	168	4.54x54	TM4	F => I	missense	0.0005051	61	120758	0	0.18	0.023	PTM (Phosphorylation)
cml1_human	163	4.49x49	TM4	I => L	missense	8.28e-06	1	120766	0	0.02	0.201	PTM (Phosphorylation)
cml1_human	163	4.49x49	TM4	I => V	missense	8.28e-06	1	120766	0	0.87	0.014	PTM (Phosphorylation)
cml1_human	160	4.46x46	TM4	C => F	missense	8.281e-06	1	120760	0	0.0	0.474	PTM (Phosphorylation)
cml1_human	158	4.44x44	TM4	M => I	missense	8.281e-06	1	120762	0	0.38	0.002	PTM (Phosphorylation)
cml1_human	158	4.44x44	TM4	M => V	missense	4.968e-05	6	120766	0	0.46	0.001	PTM (Phosphorylation)
cml1_human	154	4.40x40	TM4	R => H	missense	8.281e-06	1	120764	0	0.01	0.496	PTM (Phosphorylation)
cml1_human	154	4.40x40	TM4	R => C	missense	0.0004554	55	120764	0	0.02	0.552	PTM (Phosphorylation)
cml1_human	153	4.39x39	TM4	V => I	missense	3.312e-05	4	120762	0	0.42	0.013	PTM (Phosphorylation)
cml1_human	151	34.57x57	ICL2	R => H	missense	4.14e-05	5	120760	0	0.0	1.0	PTM (Phosphorylation) GP (contact)
cml1_human	151	34.57x57	ICL2	R => C	missense	3.312e-05	4	120762	0	0.0	1.0	PTM (Phosphorylation) GP (contact)
cml1_human	150	34.56x56	ICL2	H => Q	missense	8.281e-06	1	120764	0	0.01	0.967	PTM (Phosphorylation) GP (contact)
cml1_human	144	34.50x50	ICL2	P => L	missense	8.281e-06	1	120760	0	0.0	0.996	PTM (Acetylation) GP (contact)
cml1_human	144	34.50x50	ICL2	P => S	missense	1.656e-05	2	120762	0	0.0	1.0	PTM (Acetylation) GP (contact)
cml1_human	142	3.55x55	TM3	L => P	missense	8.281e-06	1	120764	0	0.0	0.905	PTM (Phosphorylation) GP (contact)
cml1_human	142	3.55x55	TM3	L => F	missense	0.01054	1273	120762	15	0.0	0.213	PTM (Phosphorylation) GP (contact)
cml1_human	137	3.50x50	TM3	R => H	missense	2.484e-05	3	120756	0	0.0	1.0	PTM (Phosphorylation) GP (contact)
cml1_human	137	3.50x50	TM3	R => C	missense	3.312e-05	4	120760	0	0.0	1.0	PTM (Phosphorylation) GP (contact)
cml1_human	136	3.49x49	TM3	D => G	missense	8.281e-06	1	120754	0	0.0	0.998	PTM (Phosphorylation)
cml1_human	133	3.46x46	TM3	I => V	missense	8.281e-06	1	120762	0	0.0	0.99	SodiumPocket MicroSwitch PTM (Phosphorylation)
cml1_human	132	3.45x45	TM3	I => V	missense	1.656e-05	2	120756	0	1.0	0.004	PTM (Ubiquitylation)
cml1_human	127	3.40x40	TM3	V => I	missense	2.484e-05	3	120754	0	0.03	0.895	PTM (Phosphorylation)
cml1_human	126	3.39x39	TM3	S => R	missense	8.281e-06	1	120762	0	0.0	0.892	PTM (Phosphorylation)
cml1_human	124	3.37x37	TM3	F => L	missense	1.656e-05	2	120764	0	0.01	0.072	SodiumPocket MicroSwitch PTM (Phosphorylation)
cml1_human	123	3.36x36	TM3	M => I	missense	8.281e-06	1	120762	0	0.01	0.25
cml1_human	123	3.36x36	TM3	M => V	missense	8.281e-06	1	120760	0	0.0	0.25
cml1_human	122	3.35x35	TM3	N => D	missense	8.28e-06	1	120766	0	0.0	0.986	PTM (Phosphorylation)
cml1_human	109	3.22x22	TM3	T => S	missense	0.0001076	13	120780	0	0.06	0.071
cml1_human	100	2.65x65	TM2	A => S	missense	8.281e-06	1	120764	0	0.0	0.976
cml1_human	100	2.65x65	TM2	A => T	missense	1.656e-05	2	120764	0	0.01	0.899
cml1_human	95	2.60x60	TM2	H => R	missense	8.283e-06	1	120736	0	0.05	0.026
cml1_human	94	2.59x59	TM2	I => T	missense	8.283e-06	1	120728	0	0.0	0.219
cml1_human	92	2.57x57	TM2	L => V	missense	4.142e-05	5	120716	0	0.0	0.962	PTM (Proteolytic Cleavage)
cml1_human	85	2.50x50	TM2	D => V	missense	8.285e-06	1	120700	0	0.0	0.992	PTM (Phosphorylation)
cml1_human	82	2.47x47	TM2	A => E	missense	3.314e-05	4	120690	0	0.0	0.998	PTM (Proteolytic Cleavage)
cml1_human	78	2.43x43	TM2	F => L	missense	8.287e-06	1	120670	0	0.04	0.247	PTM (N-linked Glycosylation)
cml1_human	75	2.40x40	TM2	M => V	missense	0.0001243	15	120662	0	0.07	0.0	PTM (Proteolytic Cleavage)
cml1_human	73	2.38x38	TM2	V => A	missense	8.288e-06	1	120654	0	0.0	0.591	PTM (Phosphorylation)
cml1_human	69		ICL1	M => V	missense	8.289e-05	10	120642	0	0.02	0.434	PTM (Proteolytic Cleavage)
cml1_human	64	1.56x56	TM1	I => T	missense	0.005173	624	120622	4	0.0	0.939	PTM (Proteolytic Cleavage)
cml1_human	62	1.54x54	TM1	I => S	missense	0.003614	436	120632	1	0.0	0.983	PTM (Phosphorylation)
cml1_human	62	1.54x54	TM1	I => V	missense	8.29e-06	1	120634	0	0.03	0.434	PTM (Phosphorylation)
cml1_human	60	1.52x52	TM1	L => V	missense	8.29e-06	1	120628	0	0.22	0.155	PTM (Phosphorylation)
cml1_human	59	1.51x51	TM1	G => V	missense	8.29e-06	1	120624	0	0.0	0.999	PTM (Proteolytic Cleavage)
cml1_human	57	1.49x49	TM1	G => D	missense	1.658e-05	2	120612	0	0.0	1.0	PTM (Phosphorylation)
cml1_human	56	1.48x48	TM1	L => P	missense	8.291e-06	1	120614	0	0.03	0.029	PTM (Phosphorylation)
cml1_human	54	1.46x46	TM1	G => R	missense	8.293e-06	1	120588	0	0.0	1.0	PTM (Phosphorylation)
cml1_human	54	1.46x46	TM1	G => R	missense	1.659e-05	2	120588	0	0.0	1.0	PTM (Phosphorylation)
cml1_human	53	1.45x45	TM1	L => F	missense	1.658e-05	2	120606	0	0.02	0.994	PTM (Phosphorylation)
cml1_human	50	1.42x42	TM1	V => I	missense	4.975e-05	6	120608	0	0.17	0.001	PTM (Phosphorylation)
cml1_human	46	1.38x38	TM1	V => I	missense	8.291e-06	1	120618	0	1.0	0.005	PTM (O-GalNAc)
cml1_human	45	1.37x37	TM1	V => M	missense	8.29e-06	1	120620	0	0.02	0.841	PTM (Proteolytic Cleavage)
cml1_human	44	1.36x36	TM1	V => M	missense	2.487e-05	3	120614	0	0.33	0.474
cml1_human	41	1.33x33	TM1	I => F	missense	1.658e-05	2	120610	0	0.02	0.031	PTM (Phosphorylation)
cml1_human	37		N-term	R => S	missense	8.292e-06	1	120602	0	0.69	0.007
cml1_human	37		N-term	R => G	missense	3.317e-05	4	120608	0	0.45	0.001
cml1_human	33		N-term	P => L	missense	1.659e-05	2	120582	0	0.05	0.045	PTM (Phosphorylation)
cml1_human	33		N-term	P => T	missense	2.488e-05	3	120586	0	0.12	0.045	PTM (Phosphorylation)
cml1_human	32		N-term	S => F	missense	8.294e-06	1	120572	0	0.01	0.027	PTM (Phosphorylation)
cml1_human	25		N-term	I => T	missense	0.001643	198	120476	1	0.33	0.001	PTM (Phosphorylation)
cml1_human	19		N-term	P => T	missense	2.5e-05	3	120000	0	0.51	0.0	PTM (Phosphorylation)
cml1_human	18		N-term	Y => C	missense	1.668e-05	2	119892	0	0.01	0.864	PTM (Phosphorylation)
cml1_human	9		N-term	N => H	missense	8.54e-06	1	117092	0	0.03	0.472
cml1_human	8		N-term	Y => S	missense	1.712e-05	2	116800	0	0.04	0.031	PTM (Phosphorylation)
cml1_human	7		N-term	D => G	missense	1.718e-05	2	116428	0	0.07	0.007	PTM (Phosphorylation)
cml1_human	329	8.56x56	H8	A => ProfsTer10	frameshift	4.14e-05	5	120760	0	None	None	PTM (Phosphorylation)
cml1_human	300	7.37x36	TM7	L => ProfsTer41	frameshift	8.283e-06	1	120736	0	None	None
cml1_human	146	34.52x52	ICL2	W => Ter	stop gained	8.281e-06	1	120762	0	None	None	PTM (Phosphorylation) GP (contact)
cml1_human	116	3.29x29	TM3	N => ThrfsTer15	frameshift	8.28e-06	1	120778	0	None	None
cml1_human	62	1.54x54	TM1	I => SerfsTer75	frameshift	8.29e-06	1	120632	0	None	None	PTM (Phosphorylation)
cx3c1_human	352		C-term	L => M	missense	1.718e-05	2	116420	0	0.09	0.024	PTM (Phosphorylation)
cx3c1_human	351		C-term	A => E	missense	5.141e-05	6	116702	0	0.01	0.026	PTM (Phosphorylation)
cx3c1_human	350		C-term	D => E	missense	8.532e-06	1	117208	0	0.21	0.034	PTM (Phosphorylation)
cx3c1_human	350		C-term	D => N	missense	8.521e-06	1	117352	0	0.04	0.128	PTM (Phosphorylation)
cx3c1_human	348		C-term	D => G	missense	0.0001015	12	118182	0	0.0	0.888	PTM (Phosphorylation)
cx3c1_human	346		C-term	T => M	missense	5.875e-05	7	119148	0	0.02	0.644	PTM (Phosphorylation)
cx3c1_human	345		C-term	H => R	missense	8.365e-06	1	119544	0	0.31	0.137	PTM (Phosphorylation)
cx3c1_human	344		C-term	Y => C	missense	8.35e-06	1	119754	0	0.12	0.632	SodiumPocket MicroSwitch PTM (Phosphorylation)
cx3c1_human	340		C-term	S => R	missense	8.314e-06	1	120274	0	0.0	0.979	SodiumPocket MicroSwitch PTM (Retinal protein)
cx3c1_human	336		C-term	S => R	missense	8.293e-06	1	120580	0	0.0	0.979	PTM (Phosphorylation)
cx3c1_human	327		C-term	S => F	missense	5.798e-05	7	120732	0	0.01	0.652	PTM (Phosphorylation)
cx3c1_human	325		C-term	S => F	missense	8.282e-06	1	120744	0	0.14	0.289	PTM (Phosphorylation)
cx3c1_human	322		C-term	V => I	missense	0.0001408	17	120754	0	0.53	0.006	PTM (Phosphorylation)
cx3c1_human	318		C-term	R => C	missense	9.109e-05	11	120758	0	0.21	0.634	PTM (Phosphorylation)
cx3c1_human	313		C-term	A => V	missense	0.000149	18	120766	0	0.02	0.038	PTM (Phosphorylation)
cx3c1_human	311		C-term	C => Y	missense	5.796e-05	7	120766	0	0.41	0.02	PTM (Phosphorylation)
cx3c1_human	294	7.54x54	TM7	A => E	missense	1.656e-05	2	120768	0	0.0	0.984	PTM (Phosphorylation)
cx3c1_human	294	7.54x54	TM7	A => T	missense	8.28e-06	1	120766	0	0.01	0.956	PTM (Phosphorylation)
cx3c1_human	292	7.52x52	TM7	I => M	missense	0.0002236	27	120770	0	0.0	1.0	PTM (Phosphorylation)
cx3c1_human	287	7.47x47	TM7	C => Y	missense	8.28e-06	1	120768	0	0.0	1.0	PTM (Phosphorylation)
cx3c1_human	284	7.44x43	TM7	S => G	missense	8.28e-06	1	120768	0	0.02	0.033
cx3c1_human	281	7.41x40	TM7	V => A	missense	8.28e-06	1	120768	0	0.0	0.174	PTM (Phosphorylation)
cx3c1_human	280	7.40x39	TM7	T => M	missense	0.1362	16453	120766	1342	0.01	0.344	PTM (Sumoylation)
cx3c1_human	278	7.38x37	TM7	T => A	missense	0.0001573	19	120770	0	0.0	0.623
cx3c1_human	268	7.28x27	TM7	R => S	missense	8.28e-06	1	120768	0	0.81	0.122	PTM (Phosphorylation)
cx3c1_human	264	7.24x23	TM7	S => T	missense	8.28e-06	1	120768	0	0.16	0.026	PTM (Phosphorylation)
cx3c1_human	258	6.62x62	TM6	L => P	missense	5.796e-05	7	120770	0	0.28	0.83	PTM (Phosphorylation)
cx3c1_human	258	6.62x62	TM6	L => F	missense	7.452e-05	9	120768	0	0.26	0.015	PTM (Phosphorylation)
cx3c1_human	255	6.59x59	TM6	T => M	missense	5.796e-05	7	120766	0	0.02	1.0	PTM (Phosphorylation)
cx3c1_human	254	6.58x58	TM6	E => D	missense	8.28e-06	1	120770	0	0.16	0.094	PTM (Acetylation)
cx3c1_human	251	6.55x55	TM6	I => F	missense	1.656e-05	2	120770	0	0.01	0.89	PTM (Phosphorylation)
cx3c1_human	250	6.54x54	TM6	M => V	missense	8.28e-06	1	120770	0	1.0	0.003	PTM (Phosphorylation)
cx3c1_human	249	6.53x53	TM6	V => I	missense	0.2209	26680	120764	3273	0.97	0.037	PTM (Phosphorylation)
cx3c1_human	245	6.49x49	TM6	T => I	missense	2.484e-05	3	120770	0	0.01	1.0	PTM (Phosphorylation)
cx3c1_human	242	6.46x46	TM6	L => V	missense	1.656e-05	2	120766	0	0.1	0.872	PTM (Phosphorylation)
cx3c1_human	241	6.45x45	TM6	F => S	missense	1.656e-05	2	120768	0	0.0	0.958	PTM (Phosphorylation)
cx3c1_human	239	6.43x43	TM6	V => M	missense	1.656e-05	2	120770	0	0.06	0.424	PTM (Phosphorylation)
cx3c1_human	236	6.40x40	TM6	V => A	missense	8.28e-06	1	120770	0	0.0	0.999	PTM (Phosphorylation) GP (contact)
cx3c1_human	227	6.31x31	TM6	A => V	missense	8.28e-06	1	120770	0	0.5	0.046	PTM (Phosphorylation)
cx3c1_human	224		ICL3	H => Y	missense	1.656e-05	2	120770	1	0.0	0.653	PTM (Methylation)
cx3c1_human	217	5.64x64	TM5	T => M	missense	5.796e-05	7	120770	0	0.0	1.0	PTM (Phosphorylation) GP (contact)
cx3c1_human	216	5.63x63	TM5	Q => L	missense	0.0007783	94	120770	0	0.01	0.004	PTM (Phosphorylation)
cx3c1_human	214	5.61x61	TM5	I => V	missense	8.28e-06	1	120770	0	0.0	0.997	PTM (Phosphorylation) GP (contact)
cx3c1_human	207	5.54x54	TM5	M => I	missense	8.28e-06	1	120768	0	0.07	0.422	SodiumPocket MicroSwitch
cx3c1_human	198	5.45x46	TM5	L => I	missense	8.28e-06	1	120770	0	0.13	0.212	PTM (N-linked Glycosylation)
cx3c1_human	193	5.40x41	TM5	V => M	missense	8.28e-06	1	120770	0	0.07	0.077	PTM (Phosphorylation)
cx3c1_human	191	5.38x39	TM5	R => L	missense	8.28e-06	1	120768	0	0.66	0.04	PTM (N-linked Glycosylation)
cx3c1_human	191	5.38x39	TM5	R => H	missense	8.28e-06	1	120768	0	0.54	0.857	PTM (N-linked Glycosylation)
cx3c1_human	191	5.38x39	TM5	R => C	missense	0.0004968	60	120768	0	0.2	0.04	PTM (N-linked Glycosylation)
cx3c1_human	191	5.38x39	TM5	R => S	missense	8.28e-06	1	120768	0	0.45	0.495	PTM (N-linked Glycosylation)
cx3c1_human	189	5.36x37	TM5	V => M	missense	6.624e-05	8	120768	0	0.01	0.972
cx3c1_human	181		ECL2	E => K	missense	3.312e-05	4	120770	0	0.38	0.69
cx3c1_human	173		ECL2	N => S	missense	8.28e-06	1	120770	0	0.22	0.037	PTM (Disulfide bond)
cx3c1_human	170		ECL2	Q => E	missense	8.28e-06	1	120770	0	0.28	0.006	PTM (Phosphorylation)
cx3c1_human	169		ECL2	K => N	missense	2.484e-05	3	120770	0	0.03	0.861
cx3c1_human	166	4.62x63	TM4	M => K	missense	8.28e-06	1	120768	0	0.0	0.998
cx3c1_human	166	4.62x63	TM4	M => T	missense	8.28e-06	1	120768	0	0.0	0.997
cx3c1_human	164	4.60x61	TM4	Q => R	missense	1.656e-05	2	120768	0	0.11	0.933
cx3c1_human	162	4.58x59	TM4	A => V	missense	4.968e-05	6	120764	0	0.62	0.088	PTM (Phosphorylation)
cx3c1_human	158	4.54x54	TM4	I => V	missense	1.656e-05	2	120760	0	0.57	0.578	PTM (Phosphorylation)
cx3c1_human	156	4.52x52	TM4	A => E	missense	8.281e-06	1	120754	0	0.0	0.969	PTM (Phosphorylation)
cx3c1_human	156	4.52x52	TM4	A => T	missense	8.283e-06	1	120728	0	0.04	0.886	PTM (Phosphorylation)
cx3c1_human	153	4.49x49	TM4	V => I	missense	0.000265	32	120742	0	0.13	0.196	PTM (Phosphorylation)
cx3c1_human	147	4.43x43	TM4	V => I	missense	0.00251	303	120730	6	0.42	0.196	PTM (Phosphorylation)
cx3c1_human	146	4.42x42	TM4	G => S	missense	8.283e-06	1	120734	0	0.04	0.624	PTM (Phosphorylation)
cx3c1_human	143	4.39x39	TM4	V => M	missense	5.798e-05	7	120730	0	0.02	0.463	PTM (Phosphorylation)
cx3c1_human	141	34.57x57	ICL2	R => Q	missense	8.283e-06	1	120724	0	0.0	1.0	PTM (Phosphorylation) GP (contact)
cx3c1_human	141	34.57x57	ICL2	R => W	missense	8.284e-06	1	120710	0	0.0	1.0	PTM (Phosphorylation) GP (contact)
cx3c1_human	139	34.55x55	ICL2	N => K	missense	8.284e-06	1	120714	0	1.0	0.17	PTM (Phosphorylation) GP (contact)
cx3c1_human	138	34.54x54	ICL2	M => I	missense	4.97e-05	6	120720	0	0.05	0.013	PTM (Phosphorylation) GP (contact)
cx3c1_human	135	34.51x51	ICL2	A => T	missense	4.143e-05	5	120700	0	0.16	0.316	PTM (Phosphorylation) GP (contact)
cx3c1_human	132	3.55x55	TM3	V => I	missense	1.657e-05	2	120690	0	0.0	0.91	PTM (Ubiquitylation) GP (contact)
cx3c1_human	128	3.51x51	TM3	Y => F	missense	1.657e-05	2	120688	0	0.03	0.163	PTM (Phosphorylation)
cx3c1_human	127	3.50x50	TM3	R => T	missense	8.286e-06	1	120688	0	0.0	0.999	PTM (Phosphorylation) GP (contact)
cx3c1_human	122	3.45x45	TM3	V => I	missense	0.0006463	78	120682	1	0.15	0.029	PTM (Phosphorylation)
cx3c1_human	119	3.42x42	TM3	F => L	missense	1.657e-05	2	120674	0	0.0	0.999	PTM (Phosphorylation)
cx3c1_human	113	3.36x36	TM3	F => C	missense	1.657e-05	2	120704	0	0.0	0.959	PTM (Phosphorylation)
cx3c1_human	112	3.35x35	TM3	G => A	missense	0.0002983	36	120696	0	0.03	1.0	PTM (Phosphorylation)
cx3c1_human	112	3.35x35	TM3	G => S	missense	8.284e-06	1	120712	0	0.0	1.0	PTM (Phosphorylation)
cx3c1_human	108	3.31x31	TM3	F => S	missense	8.284e-06	1	120714	0	0.01	0.807	PTM (Acetylation)
cx3c1_human	108	3.31x31	TM3	F => V	missense	8.284e-06	1	120716	0	0.18	0.307	PTM (Acetylation)
cx3c1_human	107	3.30x30	TM3	A => T	missense	2.485e-05	3	120718	0	0.02	0.387	PTM (Phosphorylation)
cx3c1_human	101	3.24x24	TM3	M => L	missense	8.283e-06	1	120736	0	0.37	0.001	PTM (Phosphorylation)
cx3c1_human	99		ECL1	N => S	missense	2.485e-05	3	120740	0	0.11	0.297	PTM (N-linked Glycosylation)
cx3c1_human	87	2.60x60	TM2	W => C	missense	1.656e-05	2	120766	1	0.0	1.0
cx3c1_human	86	2.59x59	TM2	F => I	missense	8.28e-06	1	120770	0	0.0	0.967	PTM (Proteolytic Cleavage)
cx3c1_human	82	2.55x55	TM2	A => T	missense	8.28e-06	1	120770	0	0.08	0.054	PTM (Proteolytic Cleavage)
cx3c1_human	80	2.53x53	TM2	F => L	missense	8.28e-06	1	120772	0	0.03	0.39	PTM (Phosphorylation)
cx3c1_human	74	2.47x47	TM2	A => G	missense	8.28e-06	1	120772	0	0.0	0.999	PTM (Phosphorylation)
cx3c1_human	72	2.45x45	TM2	N => S	missense	8.28e-06	1	120770	0	0.01	0.999	PTM (Proteolytic Cleavage)
cx3c1_human	71	2.44x44	TM2	L => Q	missense	0.0001159	14	120772	0	0.0	0.995	PTM (Methylation)
cx3c1_human	68	2.41x41	TM2	I => T	missense	8.28e-06	1	120770	0	0.0	0.804	PTM (Phosphorylation)
cx3c1_human	67	2.40x40	TM2	D => N	missense	3.312e-05	4	120770	0	0.0	1.0	PTM (Phosphorylation)
cx3c1_human	63	12.51x51	ICL1	K => E	missense	8.28e-06	1	120770	0	0.0	0.931	PTM (Phosphorylation)
cx3c1_human	59	1.60x60	TM1	S => N	missense	8.28e-06	1	120766	0	0.2	0.975	PTM (Proteolytic Cleavage)
cx3c1_human	57	1.58x58	TM1	T => A	missense	0.002857	345	120768	3	0.09	0.023	PTM (Phosphorylation)
cx3c1_human	55	1.56x56	TM1	A => T	missense	8.28e-06	1	120768	0	0.19	0.825	PTM (Proteolytic Cleavage)
cx3c1_human	49	1.50x50	TM1	N => K	missense	8.28e-06	1	120766	0	0.0	1.0	PTM (Phosphorylation)
cx3c1_human	47	1.48x48	TM1	V => L	missense	1.656e-05	2	120764	0	0.45	0.025	PTM (Phosphorylation)
cx3c1_human	45	1.46x46	TM1	G => C	missense	8.28e-06	1	120766	0	0.0	1.0	PTM (Proteolytic Cleavage)
cx3c1_human	40	1.41x41	TM1	V => I	missense	1.656e-05	2	120758	0	0.02	0.004
cx3c1_human	33	1.34x34	TM1	F => I	missense	8.281e-06	1	120756	0	0.0	0.964	PTM (Phosphorylation)
cx3c1_human	27	1.28x28	TM1	V => M	missense	8.283e-06	1	120736	0	0.01	0.127	PTM (Phosphorylation)
cx3c1_human	26	1.27x27	TM1	I => T	missense	1.657e-05	2	120732	0	0.0	0.818	PTM (Sulfation)
cx3c1_human	26	1.27x27	TM1	I => N	missense	2.485e-05	3	120732	0	0.0	0.973	PTM (Sulfation)
cx3c1_human	25		N-term	D => G	missense	0.001822	220	120720	3	0.2	0.788	PTM (Phosphorylation)
cx3c1_human	23		N-term	I => T	missense	8.283e-05	10	120726	0	0.03	0.076
cx3c1_human	23		N-term	I => N	missense	8.283e-06	1	120726	0	0.07	0.137
cx3c1_human	20		N-term	A => S	missense	4.143e-05	5	120694	0	0.07	0.261	PTM (Phosphorylation)
cx3c1_human	15		N-term	D => H	missense	8.289e-06	1	120644	0	0.01	0.956	PTM (Phosphorylation)
cx3c1_human	13		N-term	E => D	missense	0.009857	1189	120626	14	0.66	0.005	PTM (Phosphorylation)
cx3c1_human	4		N-term	F => L	missense	3.321e-05	4	120462	0	0.52	0.015	PTM (Phosphorylation)
cx3c1_human	335		C-term	G => Ter	stop gained	8.28e-06	1	120770	0	None	None	PTM (Phosphorylation)
cx3c1_human	46	1.47x47	TM1	L => Ter	stop gained	8.289e-06	1	120638	0	None	None	PTM (O-GalNAc)
cx3c1_human	13		N-term	E => TrpfsTer28	frameshift	2.61e-05	3	114960	0	None	None	PTM (Phosphorylation)
cx3c1_human	5		N-term	P => TrpfsTer36	frameshift	9.476e-06	1	105530	0	None	None	PTM (N-linked Glycosylation)
cxcr1_human	348		C-term	S => P	missense	8.246e-06	1	121274	0	0.01	0.0	PTM (Phosphorylation)
cxcr1_human	342		C-term	S => L	missense	0.003206	389	121338	4	0.05	0.0	PTM (Phosphorylation)
cxcr1_human	341		C-term	S => F	missense	8.241e-06	1	121348	0	0.0	0.0	PTM (Phosphorylation)
cxcr1_human	338		C-term	S => F	missense	8.239e-06	1	121368	0	0.06	0.004	PTM (Dephosphorylation)
cxcr1_human	335		C-term	R => H	missense	3.295e-05	4	121388	0	0.16	0.066	PTM (Phosphorylation)
cxcr1_human	335		C-term	R => C	missense	0.02659	3227	121384	50	0.01	0.877	PTM (Phosphorylation)
cxcr1_human	334		C-term	H => R	missense	9.062e-05	11	121392	0	0.31	0.013	PTM (Phosphorylation)
cxcr1_human	333		C-term	R => H	missense	0.0001895	23	121392	0	0.27	0.02	PTM (Phosphorylation)
cxcr1_human	333		C-term	R => C	missense	0.0001812	22	121392	0	0.0	0.836	PTM (Phosphorylation)
cxcr1_human	323		C-term	H => Q	missense	1.648e-05	2	121374	0	0.12	0.071	PTM (Phosphorylation)
cxcr1_human	323		C-term	H => R	missense	8.239e-06	1	121374	0	0.53	0.003	PTM (Phosphorylation)
cxcr1_human	322		C-term	M => T	missense	1.648e-05	2	121366	0	0.81	0.0	PTM (Phosphorylation)
cxcr1_human	322		C-term	M => V	missense	8.239e-06	1	121368	0	0.41	0.0	PTM (Phosphorylation)
cxcr1_human	320	8.58x58	H8	L => P	missense	8.24e-06	1	121364	0	0.0	0.968	PTM (Phosphorylation)
cxcr1_human	319	8.57x57	H8	I => N	missense	1.648e-05	2	121358	0	0.0	0.77	PTM (Phosphorylation)
cxcr1_human	314	8.52x52	H8	H => L	missense	4.121e-05	5	121342	0	0.01	0.007	PTM (Phosphorylation)
cxcr1_human	314	8.52x52	H8	H => R	missense	8.241e-06	1	121342	0	0.26	0.002	PTM (Phosphorylation)
cxcr1_human	313	8.51x51	H8	R => H	missense	0.0007336	89	121326	0	0.01	0.637	PTM (Phosphorylation) GP (contact)
cxcr1_human	313	8.51x51	H8	R => C	missense	5.77e-05	7	121324	0	0.01	0.726	PTM (Phosphorylation) GP (contact)
cxcr1_human	312	8.50x50	H8	F => S	missense	8.242e-06	1	121334	0	0.0	0.999	PTM (Retinal protein)
cxcr1_human	312	8.50x50	H8	F => I	missense	8.242e-06	1	121324	0	0.0	0.999	PTM (Retinal protein)
cxcr1_human	306	7.54x54	TM7	A => T	missense	1.649e-05	2	121264	0	0.0	0.805	PTM (Phosphorylation)
cxcr1_human	292	7.40x39	TM7	I => T	missense	0.0001485	18	121176	0	0.0	0.141	PTM (Phosphorylation)
cxcr1_human	291	7.39x38	TM7	E => K	missense	8.254e-06	1	121152	0	0.14	0.633	PTM (Phosphorylation)
cxcr1_human	288	7.36x35	TM7	D => V	missense	8.253e-06	1	121172	0	0.42	0.082	PTM (Phosphorylation)
cxcr1_human	285	7.33x32	TM7	R => Q	missense	3.301e-05	4	121176	0	0.78	0.009	PTM (Phosphorylation)
cxcr1_human	285	7.33x32	TM7	R => W	missense	0.0002145	26	121186	0	0.06	0.022	PTM (Phosphorylation)
cxcr1_human	284	7.32x31	TM7	G => S	missense	4.125e-05	5	121200	1	0.1	0.016
cxcr1_human	283	7.31x30	TM7	I => F	missense	0.003605	437	121216	9	0.0	0.9	PTM (Phosphorylation)
cxcr1_human	280	7.28x27	TM7	R => H	missense	0.0001733	21	121210	0	0.03	0.117	PTM (Sumoylation)
cxcr1_human	280	7.28x27	TM7	R => L	missense	1.65e-05	2	121210	0	0.0	0.815	PTM (Sumoylation)
cxcr1_human	280	7.28x27	TM7	R => C	missense	0.0001979	24	121246	0	0.0	0.953	PTM (Sumoylation)
cxcr1_human	279	7.27x26	TM7	R => H	missense	0.0001897	23	121236	0	0.29	0.035	PTM (Methylation)
cxcr1_human	279	7.27x26	TM7	R => C	missense	0.0002474	30	121244	1	0.11	0.035	PTM (Methylation)
cxcr1_human	278	7.26x25	TM7	E => K	missense	8.247e-06	1	121256	0	0.23	0.012
cxcr1_human	277	7.25x24	TM7	C => S	missense	8.245e-06	1	121284	0	0.0	1.0	PTM (Phosphorylation)
cxcr1_human	276	7.24x23	TM7	S => T	missense	0.09146	11089	121248	734	1.0	0.006
cxcr1_human	275		ECL3	E => D	missense	8.243e-06	1	121310	0	0.21	0.029	PTM (Phosphorylation)
cxcr1_human	273		ECL3	I => V	missense	8.241e-06	1	121338	0	0.16	0.53	PTM (Phosphorylation)
cxcr1_human	269	6.62x62	TM6	R => K	missense	1.648e-05	2	121368	0	0.0	0.411	PTM (Phosphorylation)
cxcr1_human	268	6.61x61	TM6	M => K	missense	1.648e-05	2	121378	0	0.0	0.309	PTM (Phosphorylation)
cxcr1_human	268	6.61x61	TM6	M => L	missense	0.00276	335	121378	5	0.17	0.009	PTM (Phosphorylation)
cxcr1_human	268	6.61x61	TM6	M => V	missense	8.239e-06	1	121378	0	0.03	0.155	PTM (Phosphorylation)
cxcr1_human	266	6.59x59	TM6	T => S	missense	2.471e-05	3	121388	0	0.05	0.3	PTM (Phosphorylation)
cxcr1_human	264	6.57x57	TM6	A => E	missense	8.237e-06	1	121400	0	0.05	0.493	PTM (Phosphorylation)
cxcr1_human	264	6.57x57	TM6	A => T	missense	8.237e-06	1	121400	0	0.91	0.012	PTM (Phosphorylation)
cxcr1_human	248	6.41x41	TM6	V => I	missense	1.647e-05	2	121412	0	0.02	0.927	PTM (Phosphorylation)
cxcr1_human	246	6.39x39	TM6	A => V	missense	8.236e-06	1	121412	0	0.1	0.327	PTM (Phosphorylation)
cxcr1_human	239	6.32x32	TM6	R => Q	missense	1.647e-05	2	121412	0	0.03	0.719	PTM (Phosphorylation) GP (contact)
cxcr1_human	239	6.32x32	TM6	R => G	missense	1.647e-05	2	121398	0	0.0	0.971	PTM (Phosphorylation) GP (contact)
cxcr1_human	238	6.31x31	TM6	H => Y	missense	8.236e-06	1	121412	0	0.03	0.03	PTM (Phosphorylation)
cxcr1_human	233		ICL3	H => Y	missense	3.295e-05	4	121412	0	0.01	0.808	PTM (Phosphorylation)
cxcr1_human	228	5.64x64	TM5	T => P	missense	2.471e-05	3	121412	0	0.01	0.988	PTM (Phosphorylation) GP (contact)
cxcr1_human	227	5.63x63	TM5	R => H	missense	3.295e-05	4	121410	0	0.63	0.022	PTM (Phosphorylation)
cxcr1_human	227	5.63x63	TM5	R => C	missense	9.884e-05	12	121410	0	0.27	0.013	PTM (Phosphorylation)
cxcr1_human	223	5.59x59	TM5	G => E	missense	2.471e-05	3	121408	0	0.02	0.481	PTM (Phosphorylation)
cxcr1_human	223	5.59x59	TM5	G => R	missense	7.413e-05	9	121406	0	0.0	0.481	PTM (Phosphorylation)
cxcr1_human	222	5.58x58	TM5	Y => C	missense	1.647e-05	2	121408	0	0.0	0.993	PTM (Phosphorylation)
cxcr1_human	218	5.54x54	TM5	M => L	missense	8.237e-06	1	121408	0	0.01	0.773	PTM (Phosphorylation)
cxcr1_human	214	5.50x50	TM5	P => L	missense	0.0005272	64	121404	1	0.0	1.0	PTM (Phosphorylation)
cxcr1_human	213	5.49x49	TM5	V => M	missense	1.647e-05	2	121404	0	0.01	0.149	PTM (Phosphorylation)
cxcr1_human	211	5.47x47	TM5	F => L	missense	0.00864	1049	121406	37	0.02	0.914	PTM (Phosphorylation)
cxcr1_human	211	5.47x47	TM5	F => L	missense	2.471e-05	3	121404	0	0.02	0.914	PTM (Phosphorylation)
cxcr1_human	209	5.45x46	TM5	F => V	missense	8.237e-06	1	121400	0	0.2	0.05	PTM (Phosphorylation)
cxcr1_human	207	5.43x44	TM5	H => D	missense	1.647e-05	2	121398	0	0.0	0.219	SodiumPocket MicroSwitch
cxcr1_human	204	5.40x41	TM5	I => T	missense	8.238e-06	1	121396	0	0.03	0.049	SodiumPocket MicroSwitch PTM (Ubiquitylation)
cxcr1_human	203	5.39x40	TM5	R => Q	missense	8.238e-05	10	121394	0	0.0	0.076	PTM (Acetylation)
[truncated: 526 more rows]
